# Supplementary material for: Exploring the Mechanism of Hawthorn Leaves Against Coronary Heart Disease Using Network Pharmacology and Molecular Docking
Source: Front Cardiovasc Med. 2022 Jun 16;9:804801. doi: 10.3389/fcvm.2022.804801 (PMC9243333; doi:10.3389/fcvm.2022.804801)
Supplement: Supplementary file 1 [file Data_Sheet_1.xlsx]

## Sheet: Table S1
Table S1 835 unique target genes were identified in nine compounds of the hawthorn leaves in Fuxinpian
Number	Mol ID	Molecule Name	Gene name	Uniprot ID	Protein name	Database
1	MOL000073	ent-Epicatechin	BACE1	P56817	Beta-secretase 1	Pubchem/Swiss Target
2	MOL000073	ent-Epicatechin	OPRD1	P41143	Delta-type opioid receptor1	Pubchem
3	MOL000073	ent-Epicatechin	OPRK1	P41145	Kappa-type opioid receptor	Pubchem
4	MOL000073	ent-Epicatechin	OPRM1	P35372	Mu-type opioid receptor	Pubchem
5	MOL000073	ent-Epicatechin	PTGS1	P23219	Prostaglandin G/H synthase 1	TCMSP
6	MOL000073	ent-Epicatechin	ESR1	P03372	Estrogen receptor	Pubchem/TCMSP/Swiss Target
7	MOL000073	ent-Epicatechin	PTGS2	P35354	Prostaglandin G/H synthase 2	Pubchem/TCMSP/Swiss Target
8	MOL000098	quercetin	AIFM1	O95831	Apoptosis-inducing Factor 1, Mitochondrial	SymMap
9	MOL000098	quercetin	AK1	P00568	Adenylate Kinase Isoenzyme 1	SymMap
10	MOL000098	quercetin	ABCB1	P08183	ATP binding cassette subfamily B member 1	Pubchem/Swiss Target
11	MOL000098	quercetin	ABCC1	P33527	ATP binding cassette subfamily C member 1	Pubchem/Swiss Target
12	MOL000098	quercetin	ABCC4	O15439	ATP binding cassette subfamily C member 4	Pubchem
13	MOL000098	quercetin	ABCG2	Q9UNQ0	ATP binding cassette subfamily G member 2	Pubchem/TCMSP/Swiss Target
14	MOL000098	quercetin	ACHE	P22303	acetylcholinesterase	Pubchem/TCMSP/Swiss Target
15	MOL000098	quercetin	ADORA3	P0DMS8	adenosine A3 receptor	Pubchem
16	MOL000098	quercetin	AHR	P35869	aryl hydrocarbon receptor	Pubchem/TCMSP/Swiss Target
17	MOL000098	quercetin	AKR1B1	P15121	aldo-keto reductase family 1 member B	Pubchem/TCMSP/Swiss Target
18	MOL000098	quercetin	AKR1B10	O60218	aldo-keto reductase family 1 member B10	Pubchem/Swiss Target
19	MOL000098	quercetin	AKT1	P31749	AKT serine/threonine kinase 1	Pubchem/TCMSP/Swiss Target
20	MOL000098	quercetin	ALDH1A1	P00352	aldehyde dehydrogenase 1 family member A1	Pubchem
21	MOL000098	quercetin	ALK	Q9UM73	ALK receptor tyrosine kinase	Pubchem/Swiss Target
22	MOL000098	quercetin	ALOX12	P18054	arachidonate 12-lipoxygenase, 12S type	Pubchem/Swiss Target
23	MOL000098	quercetin	ALOX15	P12530	arachidonate 15-lipoxygenase	Pubchem/Swiss Target
24	MOL000098	quercetin	ALOX15B	O15296	arachidonate 15-lipoxygenase type B	Pubchem
25	MOL000098	quercetin	ALOX5	P12527	arachidonate 5-lipoxygenase	Pubchem/TCMSP/Swiss Target
26	MOL000098	quercetin	AMY1A	P04745	amylase alpha 1A	Pubchem/Swiss Target
27	MOL000098	quercetin	AMY1B	P04745	amylase alpha 1B	Pubchem
28	MOL000098	quercetin	AMY1C	P04745	amylase alpha 1C	Pubchem
29	MOL000098	quercetin	APP	P05067	amyloid beta precursor protein	Pubchem/Swiss Target
30	MOL000098	quercetin	AR	P10275	androgen receptor	Pubchem/TCMSP/Swiss Target
31	MOL000098	quercetin	ATAD5	Q96QE3	ATPase family AAA domain containing 5	Pubchem
32	MOL000098	quercetin	AURKB	Q96GD4	aurora kinase B	Pubchem/Swiss Target
33	MOL000098	quercetin	AVPR2	P30518	arginine vasopressin receptor 2	Pubchem
34	MOL000098	quercetin	AXL	P30530	AXL receptor tyrosine kinase	Pubchem
35	MOL000098	quercetin	BACE1	P56817	beta-secretase 1	Pubchem/Swiss Target
36	MOL000098	quercetin	BLM	P54132	BLM RecQ like helicase	Pubchem
37	MOL000098	quercetin	BRAF	P15056	B-Raf proto-oncogene, serine/threonine kinase	Pubchem
38	MOL000098	quercetin	CA1	P00915	carbonic anhydrase 1	Pubchem/Swiss Target
39	MOL000098	quercetin	CA12	O43570	carbonic anhydrase 12	Pubchem/Swiss Target
40	MOL000098	quercetin	CA14	Q9ULX7	carbonic anhydrase 14	Pubchem/Swiss Target
41	MOL000098	quercetin	CA2	P00918	carbonic anhydrase 2	pubchem
42	MOL000098	quercetin	CA3	P07451	carbonic anhydrase 3	Pubchem/Swiss Target
43	MOL000098	quercetin	CA4	P22748	carbonic anhydrase 4	Pubchem/Swiss Target
44	MOL000098	quercetin	CA5A	P35218	carbonic anhydrase 5A	Pubchem/Swiss Target
45	MOL000098	quercetin	CA5B	Q9Y2D0	carbonic anhydrase 5B	pubchem
46	MOL000098	quercetin	CA6	P23280	carbonic anhydrase 6	Pubchem/Swiss Target
47	MOL000098	quercetin	CA7	P43166	carbonic anhydrase 7	Pubchem/Swiss Target
48	MOL000098	quercetin	CA9	Q16790	carbonic anhydrase 9	Pubchem/Swiss Target
49	MOL000098	quercetin	CALM1	P0DP23	calmodulin 1	pubchem
50	MOL000098	quercetin	CAMK2B	Q13554	Calcium/calmodulin-dependent protein kinase type II subunit beta	Pubchem/Swiss Target
51	MOL000098	quercetin	CCNB1	P14635	cyclin B1	Pubchem/TCMSP/Swiss Target
52	MOL000098	quercetin	CCR4	P51679	C-C motif chemokine receptor 4	pubchem
53	MOL000098	quercetin	CD38	P28907	CD38 molecule	Pubchem/Swiss Target
54	MOL000098	quercetin	CDK1	P06493	Cyclin-dependent kinase 1	Pubchem/Swiss Target
55	MOL000098	quercetin	CDK2	P24941	cyclin dependent kinase 2	Pubchem/Swiss Target
56	MOL000098	quercetin	CDK5	Q00535	cyclin dependent kinase 5	Pubchem/Swiss Target
57	MOL000098	quercetin	CDK5R1	Q15078	cyclin dependent kinase 5 regulatory subunit 1	Pubchem/Swiss Target
58	MOL000098	quercetin	CDK6	Q00534	cyclin dependent kinase 6	Pubchem/Swiss Target
59	MOL000098	quercetin	CLK1	P49759	CDC like kinase 1	Pubchem
60	MOL000098	quercetin	CLK3	P49761	CDC like kinase 3	Pubchem
61	MOL000098	quercetin	CSNK1G1	Q9HCP0	casein kinase 1 gamma 1	Pubchem
62	MOL000098	quercetin	CSNK1G2	P78368	casein kinase 1 gamma 2	Pubchem
63	MOL000098	quercetin	CSNK2A1	P68400	casein kinase 2 alpha 1	Pubchem/Swiss Target
64	MOL000098	quercetin	CSNK2A2	P19784	casein kinase 2 alpha 2	Pubchem
65	MOL000098	quercetin	CSNK2B	P67870	casein kinase 2 beta	Pubchem
66	MOL000098	quercetin	CXCR1	P25024	C-X-C motif chemokine receptor 1	Pubchem/Swiss Target
67	MOL000098	quercetin	CYP19A1	P11511	cytochrome P450 family 19 subfamily A member 1	Pubchem/Swiss Target
68	MOL000098	quercetin	CYP1A1	P04798	cytochrome P450 family 1 subfamily A member 1	Pubchem/TCMSP
69	MOL000098	quercetin	CYP1A2	P05177	cytochrome P450 family 1 subfamily A member 2	Pubchem/TCMSP
70	MOL000098	quercetin	CYP1B1	Q16678	cytochrome P450 family 1 subfamily B member 1	Pubchem/TCMSP/Swiss Target
71	MOL000098	quercetin	CYP2C19	P33261	cytochrome P450 family 2 subfamily C member 19	Pubchem/Swiss Target
72	MOL000098	quercetin	CYP2C8	P10632	cytochrome P450 family 2 subfamily C member 8	Pubchem
73	MOL000098	quercetin	CYP2C9	P11712	cytochrome P450 family 2 subfamily C member 9	Pubchem
74	MOL000098	quercetin	CYP2D6	P10635	cytochrome P450 family 2 subfamily D member 6	Pubchem
75	MOL000098	quercetin	CYP3A4	P08684	cytochrome P450 family 3 subfamily A member 4	Pubchem/TCMSP
76	MOL000098	quercetin	DAPK1	P53355	death associated protein kinase 1	Pubchem/Swiss Target
77	MOL000098	quercetin	DIRAS1	O95057	DIRAS family GTPase 1	Pubchem
78	MOL000098	quercetin	DPP4	P27487	dipeptidyl peptidase 4	Pubchem
79	MOL000098	quercetin	DRD1	P21728	dopamine receptor D1	Pubchem
80	MOL000098	quercetin	DRD4	P21917	D(4) dopamine receptor	Pubchem/Swiss Target
81	MOL000098	quercetin	EGFR	P35968	epidermal growth factor receptor	Pubchem/TCMSP/Swiss Target
82	MOL000098	quercetin	ELANE	P08246	elastase, neutrophil expressed	Pubchem
83	MOL000098	quercetin	ELAVL1	Q15717	ELAV like RNA binding protein 1	Pubchem
84	MOL000098	quercetin	ELAVL3	Q14576	ELAV like RNA binding protein 3	Pubchem
85	MOL000098	quercetin	EPHX2	P34913	epoxide hydrolase 2	Pubchem
86	MOL000098	quercetin	ESR1	P03372	Estrogen receptor	Pubchem/TCMSP/Swiss Target
87	MOL000098	quercetin	ESRRA	P11474	estrogen related receptor alpha	Pubchem/Swiss Target
88	MOL000098	quercetin	EZH2	Q15910	enhancer of zeste 2 polycomb repressive complex 2 subunit	Pubchem
89	MOL000098	quercetin	F2	P00734	coagulation factor II, thrombin	Pubchem/Swiss Target
90	MOL000098	quercetin	FEN1	P39748	flap structure-specific endonuclease 1	Pubchem
91	MOL000098	quercetin	FLT3	P36888	fms related tyrosine kinase 3	Pubchem
92	MOL000098	quercetin	GAA	P10253	glucosidase alpha, acid	Pubchem
93	MOL000098	quercetin	GALK1	P51570	galactokinase 1	pubchem
94	MOL000098	quercetin	GCK	P35557	glucokinase	pubchem
95	MOL000098	quercetin	GLO1	Q04760	glyoxalase I	Pubchem/Swiss Target
96	MOL000098	quercetin	GPR35	Q9HC97	G protein-coupled receptor 35	Pubchem/Swiss Target
97	MOL000098	quercetin	GSK3A	P49840	glycogen synthase kinase 3 alpha	pubchem
98	MOL000098	quercetin	GSK3B	P49841	glycogen synthase kinase 3 beta	Pubchem/TCMSP/Swiss Target
99	MOL000098	quercetin	HDAC9	Q9UKV0	histone deacetylase 9	pubchem
100	MOL000098	quercetin	HIF1A	Q16665	hypoxia inducible factor 1 subunit alpha	pubchem
101	MOL000098	quercetin	HIF1AN	Q9NWT6	hypoxia inducible factor 1 subunit alpha inhibitor	pubchem
102	MOL000098	quercetin	HPGD	P15428	15-hydroxyprostaglandin dehydrogenase	pubchem
103	MOL000098	quercetin	HSD17B2	P37059	hydroxysteroid 17-beta dehydrogenase 2	Pubchem/Swiss Target
104	MOL000098	quercetin	HSF1	Q00613	heat shock transcription factor 1	Pubchem/TCMSP
105	MOL000098	quercetin	HSP90AA1	P07900	heat shock protein 90 alpha family class A member 1	pubchem
106	MOL000098	quercetin	HSP90AB1	P08238	heat shock protein 90 alpha family class B member 1	pubchem
107	MOL000098	quercetin	HSPB1	P04792	heat shock protein family B (small) member 1	Pubchem/TCMSP
108	MOL000098	quercetin	IFNG	P01579	interferon gamma	pubchem
109	MOL000098	quercetin	IGF1R	P08069	insulin like growth factor 1 receptor	Pubchem/Swiss Target
110	MOL000098	quercetin	KDR	P35968	kinase insert domain receptor	pubchem
111	MOL000098	quercetin	LCK	P06239	LCK proto-oncogene, Src family tyrosine kinase	pubchem
112	MOL000098	quercetin	MAOA	P21398	monoamine oxidase A	pubchem
113	MOL000098	quercetin	MAOB	P56560	monoamine oxidase B	Pubchem/Swiss Target
114	MOL000098	quercetin	MAP3K5	Q99683	mitogen-activated protein kinase kinase kinase 5	pubchem
115	MOL000098	quercetin	MAPT	P10636	microtubule associated protein tau	pubchem
116	MOL000098	quercetin	MET	P08581	MET proto-oncogene, receptor tyrosine kinase	pubchem
117	MOL000098	quercetin	MGAM	O43451	maltase-glucoamylase	Pubchem/TCMSP
118	MOL000098	quercetin	MMP12	P39900	matrix metallopeptidase 12	Pubchem/Swiss Target
119	MOL000098	quercetin	MMP13	P45452	matrix metallopeptidase 13	Pubchem/Swiss Target
120	MOL000098	quercetin	MMP2	P08253	matrix metallopeptidase 2	Pubchem/TCMSP/Swiss Target
121	MOL000098	quercetin	MMP3	P08254	matrix metallopeptidase 3	Pubchem/TCMSP/Swiss Target
122	MOL000098	quercetin	MMP9	P14780	matrix metallopeptidase 9	Pubchem/TCMSP/Swiss Target
123	MOL000098	quercetin	MPHOSPH8	Q99549	M-phase phosphoprotein 8	Pubchem/Swiss Target
124	MOL000098	quercetin	MPO	P05164	myeloperoxidase	Pubchem/TCMSP/Swiss Target
125	MOL000098	quercetin	NEK2	P51955	NIMA related kinase 2	Pubchem/Swiss Target
126	MOL000098	quercetin	NEK6	Q9HC98	NIMA related kinase 6	Pubchem/Swiss Target
127	MOL000098	quercetin	NFKB1	P19838	nuclear factor kappa B subunit 1	pubchem
128	MOL000098	quercetin	NFKB2	Q00653	nuclear factor kappa B subunit 2	pubchem
129	MOL000098	quercetin	NOX4	Q9NPH5	NADPH oxidase 4	Pubchem/Swiss Target
130	MOL000098	quercetin	NR1I2	O75469	nuclear receptor subfamily 1 group I member 2	pubchem
131	MOL000098	quercetin	NR3C1	P04150	nuclear receptor subfamily 3 group C member 1	Pubchem/Swiss Target
132	MOL000098	quercetin	NUAK1	O60285	NUAK family kinase 1	Pubchem/Swiss Target
133	MOL000098	quercetin	PGD	P52209	phosphogluconate dehydrogenase	pubchem
134	MOL000098	quercetin	PGR	P06401	progesterone receptor	Pubchem/TCMSP
135	MOL000098	quercetin	PIK3CA	P42336	phosphatidylinositol-4,5-bisphosphate 3-kinase catalytic subunit alpha	pubchem
136	MOL000098	quercetin	PIK3CG	P48736	phosphatidylinositol-4,5-bisphosphate 3-kinase catalytic subunit gamma	Pubchem/Swiss Target
137	MOL000098	quercetin	PIK3R1	P27986	phosphoinositide-3-kinase regulatory subunit 1	Pubchem/Swiss Target
138	MOL000098	quercetin	PIM1	P11309	Pim-1 proto-oncogene, serine/threonine kinase	Pubchem/Swiss Target
139	MOL000098	quercetin	PIM2	Q9P1W9	Pim-2 proto-oncogene, serine/threonine kinase	pubchem
140	MOL000098	quercetin	PKN1	Q16512	protein kinase N1	Pubchem/Swiss Target
141	MOL000098	quercetin	PLA2G1B	P04054	phospholipase A2 group IB	Pubchem/Swiss Target
142	MOL000098	quercetin	PLAU	P00749	plasminogen activator, urokinase	Pubchem/TCMSP
143	MOL000098	quercetin	PLK1	P53350	polo like kinase 1	Pubchem/Swiss Target
144	MOL000098	quercetin	POLB	P06746	DNA polymerase beta	Pubchem/Swiss Target
145	MOL000098	quercetin	POLH	Q9Y253	DNA polymerase eta	pubchem
146	MOL000098	quercetin	POLI	Q9UNA4	DNA polymerase iota	pubchem
147	MOL000098	quercetin	POLK	Q9UBT6	DNA polymerase kappa	pubchem
148	MOL000098	quercetin	PON1	P27169	paraoxonase 1	Pubchem/TCMSP
149	MOL000098	quercetin	PREP	P48147	prolyl endopeptidase	pubchem
150	MOL000098	quercetin	PRSS1	P07477	serine protease 1	Pubchem/TCMSP
151	MOL000098	quercetin	PRSS2	P07478	serine protease 2	pubchem
152	MOL000098	quercetin	PRSS3	P35030	serine protease 3	pubchem
153	MOL000098	quercetin	PTGS2	P35354	Prostaglandin G/H synthase 2	Pubchem/TCMSP/Swiss Target
154	MOL000098	quercetin	PTK2	Q05397	protein tyrosine kinase 2	Pubchem/Swiss Target
155	MOL000098	quercetin	PTPN1	P18031	protein tyrosine phosphatase non-receptor type 1	Pubchem/Swiss Target
156	MOL000098	quercetin	PYGL	P06737	glycogen phosphorylase L	Pubchem/Swiss Target
157	MOL000098	quercetin	RELA	Q04206	RELA proto-oncogene, NF-kB subunit	Pubchem/TCMSP
158	MOL000098	quercetin	RNASEH1	O60930	ribonuclease H1	pubchem
159	MOL000098	quercetin	RXRA	P19793	retinoid X receptor alpha	Pubchem/TCMSP
160	MOL000098	quercetin	SI	P14410	sucrase-isomaltase	pubchem
161	MOL000098	quercetin	SLC2A2	P11168	solute carrier family 2 member 2	pubchem
162	MOL000098	quercetin	SLK	Q9H2G2	STE20 like kinase	pubchem
163	MOL000098	quercetin	SMAD2	Q15796	SMAD family member 2	pubchem
164	MOL000098	quercetin	SMAD3	P84022	SMAD family member 3	pubchem
165	MOL000098	quercetin	SORD	Q00796	sorbitol dehydrogenase	pubchem
166	MOL000098	quercetin	SRC	P12931	SRC proto-oncogene, non-receptor tyrosine kinase	Swiss Target
167	MOL000098	quercetin	STK16	O75716	serine/threonine kinase 16	pubchem
168	MOL000098	quercetin	SYK	P43405	spleen associated tyrosine kinase	Pubchem/TCMSP
169	MOL000098	quercetin	TDP1	Q9NUW8	tyrosyl-DNA phosphodiesterase 1	pubchem
170	MOL000098	quercetin	TOP1	P11387	DNA topoisomerase I	Pubchem/TCMSP/Swiss Target
171	MOL000098	quercetin	TOP2A	P11388	DNA topoisomerase 2-alpha	Pubchem/TCMSP/Swiss Target
172	MOL000098	quercetin	TP53	P04637	tumor protein p53	pubchem
173	MOL000098	quercetin	XDH	P47989	xanthine dehydrogenase	Pubchem/Swiss Target
174	MOL000098	quercetin	YES1	P07947	YES proto-oncogene 1, Src family tyrosine kinase	pubchem
175	MOL000098	quercetin	YWHAB	P31946	tyrosine 3-monooxygenase/tryptophan 5-monooxygenase activation protein beta	pubchem
176	MOL000098	quercetin	PTGS1	P23219	Prostaglandin G/H synthase 1	TCMSP
177	MOL000098	quercetin	PPARG	P37231	Peroxisome proliferator activated receptor gamma	Pubchem/TCMSP/Swiss Target
178	MOL000098	quercetin	NCOA2	Q15596	Nuclear receptor coactivator 2	TCMSP
179	MOL000098	quercetin	KCNH2	Q12809	Potassium voltage-gated channel subfamily H member 2	TCMSP
180	MOL000098	quercetin	SCN5A	Q14524	Sodium channel protein type 5 subunit alpha	TCMSP
181	MOL000098	quercetin	ADRB2	P07550	Beta-2 adrenergic receptor	TCMSP
182	MOL000098	quercetin	F7	P08709	Coagulation factor VII	TCMSP
183	MOL000098	quercetin	GABRA1	P14867	Gamma-aminobutyric acid receptor subunit alpha-1	TCMSP
184	MOL000098	quercetin	VEGFA	P15692	Vascular endothelial growth factor A	TCMSP
185	MOL000098	quercetin	CCND1	P24385	G1/S-specific cyclin-D1	TCMSP
186	MOL000098	quercetin	BCL2	Q92934	Apoptosis regulator Bcl-2	TCMSP
187	MOL000098	quercetin	BCL2L1	Q07817	Bcl-2-like protein 1	TCMSP
188	MOL000098	quercetin	FOS	P01100	Proto-oncogene c-Fos	TCMSP
189	MOL000098	quercetin	CDKN1A	P38936	Cyclin-dependent kinase inhibitor 1	TCMSP
190	MOL000098	quercetin	EIF6	P56537	Eukaryotic translation initiation factor 6	TCMSP
191	MOL000098	quercetin	BAX	Q07812	Apoptosis regulator BAX	TCMSP
192	MOL000098	quercetin	CASP9	P55211	Caspase-9	TCMSP
193	MOL000098	quercetin	MAPK1	P28482	Mitogen-activated protein kinase 1	TCMSP
194	MOL000098	quercetin	IL10	P22301	Interleukin-10	TCMSP
195	MOL000098	quercetin	EGF	P01133	Pro-epidermal growth factor	Pubchem/TCMSP/Swiss Target
196	MOL000098	quercetin	RB1	P06400	Retinoblastoma-associated protein	TCMSP
197	MOL000098	quercetin	TNFSF15	O95150	Tumor necrosis factor	TCMSP
198	MOL000098	quercetin	JUN	P05412	Transcription factor AP-1	TCMSP
199	MOL000098	quercetin	IL6	P05231	Interleukin-6	TCMSP
200	MOL000098	quercetin	AHSA1	O95433	Activator of 90 kDa heat shock protein ATPase homolog 1	TCMSP
201	MOL000098	quercetin	CASP3	P42574	Caspase-3	TCMSP
202	MOL000098	quercetin	TP63	Q9H3D4	Cellular tumor antigen p53	TCMSP
203	MOL000098	quercetin	ELK1	P19419	ETS domain-containing protein Elk-1	TCMSP
204	MOL000098	quercetin	NFKBIA	P25963	NF-kappa-B inhibitor alpha	TCMSP
205	MOL000098	quercetin	POR	P16435	NADPH--cytochrome P450 reductase	TCMSP
206	MOL000098	quercetin	ODC1	P11926	Ornithine decarboxylase	TCMSP
207	MOL000098	quercetin	CASP8	Q14790	Caspase-8	TCMSP
208	MOL000098	quercetin	RAF1	P04049	RAF proto-oncogene serine/threonine-protein kinase	TCMSP
209	MOL000098	quercetin	SOD1	P00441	Superoxide dismutase [Cu-Zn]	TCMSP
210	MOL000098	quercetin	PRKCA	P17252	Protein kinase C alpha type	TCMSP
211	MOL000098	quercetin	MMP1	P03956	Interstitial collagenase	TCMSP
212	MOL000098	quercetin	STAT1	P42224	Signal transducer and activator of transcription 1-alpha/beta	TCMSP
213	MOL000098	quercetin	RUNX1T1	Q06455	Protein CBFA2T1	TCMSP
214	MOL000098	quercetin	ERBB2	P04626	Receptor tyrosine-protein kinase erbB-2	TCMSP
215	MOL000098	quercetin	ACACA	Q13085	Acetyl-CoA carboxylase 1	TCMSP
216	MOL000098	quercetin	HMOX1	P09601	Heme oxygenase 1	TCMSP
217	MOL000098	quercetin	CAV1	Q03135	Caveolin-1	TCMSP
218	MOL000098	quercetin	MYC	P01106	Myc proto-oncogene protein	TCMSP
219	MOL000098	quercetin	F3	P13726	Tissue factor	TCMSP
220	MOL000098	quercetin	GJA1	P17302	Gap junction alpha-1 protein	TCMSP
221	MOL000098	quercetin	ICAM1	P05362	Intercellular adhesion molecule 1	TCMSP
222	MOL000098	quercetin	IL1B	P01584	Interleukin-1 beta	TCMSP
223	MOL000098	quercetin	CCL2	P13500	C-C motif chemokine 2	TCMSP
224	MOL000098	quercetin	SELE	P16581	E-selectin	TCMSP
225	MOL000098	quercetin	VCAM1	P19320	Vascular cell adhesion protein 1	TCMSP
226	MOL000098	quercetin	PTGER3	P43115	Prostaglandin E2 receptor EP3 subtype	TCMSP
227	MOL000098	quercetin	CXCL8	P10145	Interleukin-8	TCMSP
228	MOL000098	quercetin	PRKCB	P05771	Protein kinase C beta type	TCMSP
229	MOL000098	quercetin	BIRC5	O15392	Baculoviral IAP repeat-containing protein 5	TCMSP
230	MOL000098	quercetin	DUOX2	Q9NRD8	Dual oxidase 2	TCMSP
231	MOL000098	quercetin	NOS3	P29474	Nitric oxide synthase, endothelial	TCMSP
232	MOL000098	quercetin	SULT1E1	P49888	Estrogen sulfotransferase	TCMSP
233	MOL000098	quercetin	IL2	P60568	Interleukin-2	TCMSP
234	MOL000098	quercetin	PLAT	P00750	Tissue-type plasminogen activator	TCMSP
235	MOL000098	quercetin	THBD	P07204	Thrombomodulin	TCMSP
236	MOL000098	quercetin	SERPINE1	P05121	Plasminogen activator inhibitor 1	TCMSP
237	MOL000098	quercetin	COL1A1	P02452	Collagen alpha-1(I) chain	TCMSP
238	MOL000098	quercetin	IFNG	P01579	interferon gamma	pubchem
239	MOL000098	quercetin	IL1A	P01583	Interleukin-1 alpha	TCMSP
240	MOL000098	quercetin	TOP2A	P11388	DNA topoisomerase 2-alpha	Pubchem/TCMSP/Swiss Target
241	MOL000098	quercetin	NCF1	P14598	Neutrophil cytosol factor 1	TCMSP
242	MOL000098	quercetin	HAS2	Q92819	Hyaluronan synthase 2	TCMSP
243	MOL000098	quercetin	GSTP1	P09211	Glutathione S-transferase P	TCMSP
244	MOL000098	quercetin	NFE2L2	Q16236	Nuclear factor erythroid 2-related factor 2	Pubchem/TCMSP
245	MOL000098	quercetin	NQO1	P15559	NAD(P)H dehydrogenase [quinone] 1	TCMSP
246	MOL000098	quercetin	PARP1	P09874	Poly [ADP-ribose] polymerase 1	TCMSP
247	MOL000098	quercetin	PSMD3	O43242	26S proteasome non-ATPase regulatory subunit 3	TCMSP
248	MOL000098	quercetin	SLC2A4	Q9NR83	Solute carrier family 2, facilitated glucose transporter member 4	TCMSP
249	MOL000098	quercetin	COL3A1	P02461	Collagen alpha-1(III) chain	TCMSP
250	MOL000098	quercetin	CXCL11	O14625	C-X-C motif chemokine 11	TCMSP
251	MOL000098	quercetin	CXCL2	P19875	C-X-C motif chemokine 2	TCMSP
252	MOL000098	quercetin	DCAF5	Q96JK2	DDB1- and CUL4-associated factor 5	TCMSP
253	MOL000098	quercetin	NR1I3	Q14994	Nuclear receptor subfamily 1 group I member 3	Pubchem/TCMSP/Swiss Target
254	MOL000098	quercetin	CHEK2	O96017	Serine/threonine-protein kinase Chk2	TCMSP
255	MOL000098	quercetin	INSR	P06213	Insulin receptor	Pubchem/TCMSP/Swiss Target
256	MOL000098	quercetin	CLDN4	O14493	Claudin-4	TCMSP
257	MOL000098	quercetin	PPARA	Q07869	Peroxisome proliferator-activated receptor alpha	TCMSP/Swiss Target
258	MOL000098	quercetin	PPARD	Q03181	Peroxisome proliferator-activated receptor delta	TCMSP/Swiss Target
259	MOL000098	quercetin	CRP	P02741	C-reactive protein	TCMSP
260	MOL000098	quercetin	CXCL10	P02778	C-X-C motif chemokine 10	TCMSP
261	MOL000098	quercetin	CHUK	O15111	Inhibitor of nuclear factor kappa-B kinase subunit alpha	TCMSP
262	MOL000098	quercetin	SPP1	P10451	Osteopontin	TCMSP
263	MOL000098	quercetin	RUNX2	Q13950	Runt-related transcription factor 2	TCMSP
264	MOL000098	quercetin	RASSF1	Q9NS23	Ras association domain-containing protein 1	TCMSP
265	MOL000098	quercetin	E2F1	Q01094	Transcription factor E2F1	TCMSP
266	MOL000098	quercetin	E2F2	Q14209	Transcription factor E2F2	TCMSP
267	MOL000098	quercetin	ACPP	P15309	Prostatic acid phosphatase	TCMSP
268	MOL000098	quercetin	CTSD	P07339	Cathepsin D	TCMSP
269	MOL000098	quercetin	IGFBP3	P17936	Insulin-like growth factor-binding protein 3	TCMSP
270	MOL000098	quercetin	IGF2	P01344	Insulin-like growth factor II	TCMSP
271	MOL000098	quercetin	CD40LG	P29965	CD40 ligand	TCMSP
272	MOL000098	quercetin	IRF1	P10914	Interferon regulatory factor 1	TCMSP
273	MOL000098	quercetin	ERBB3	P21860	Receptor tyrosine-protein kinase erbB-3	TCMSP
274	MOL000098	quercetin	DIO1	P49895	Type I iodothyronine deiodinase	TCMSP
275	MOL000098	quercetin	PCOLCE	Q15113	Procollagen C-endopeptidase enhancer 1	TCMSP
276	MOL000098	quercetin	NPEPPS	P55786	Puromycin-sensitive aminopeptidase	TCMSP
277	MOL000098	quercetin	HK2	P52789	Hexokinase-2	TCMSP
278	MOL000098	quercetin	RASA1	P20936	Ras GTPase-activating protein 1	TCMSP
279	MOL000098	quercetin	GSTM1	P09488	Glutathione S-transferase Mu 1	TCMSP
280	MOL000098	quercetin	GSTM2	P28161	Glutathione S-transferase Mu 2	TCMSP
281	MOL000098	quercetin	AVPR2	P30518	arginine vasopressin receptor 2	Pubchem
282	MOL000098	quercetin	MAOA	P21398	monoamine oxidase A	pubchem
283	MOL000098	quercetin	FLT3	P36888	fms related tyrosine kinase 3	Pubchem
284	MOL000098	quercetin	CA2	P00918	carbonic anhydrase 2	pubchem
285	MOL000098	quercetin	ADORA1	P30542	Adenosine A1 receptor	Swiss Target
286	MOL000098	quercetin	ADORA2A	P29274	Adenosine A2a receptor	Swiss Target
287	MOL000098	quercetin	KDR	P35968	kinase insert domain receptor	pubchem
288	MOL000098	quercetin	CDK1	P06493	Cyclin-dependent kinase 1	Pubchem/Swiss Target
289	MOL000098	quercetin	MET	P08581	MET proto-oncogene, receptor tyrosine kinase	pubchem
290	MOL000098	quercetin	ALK	Q9UM73	ALK receptor tyrosine kinase	Pubchem/Swiss Target
291	MOL000098	quercetin	AXL	P30530	AXL receptor tyrosine kinase	Pubchem
292	MOL000098	quercetin	AKR1C2	P52895	Aldo-keto reductase family 1 member C2	Swiss Target
293	MOL000098	quercetin	AKR1C1	Q04828	Aldo-keto reductase family 1 member C1	Swiss Target
294	MOL000098	quercetin	AKR1C3	P42330	Aldo-keto-reductase family 1 member C3	TCMSP/Swiss Target
295	MOL000098	quercetin	AKR1C4	P17516	Aldo-keto reductase family 1 member C4	Swiss Target
296	MOL000098	quercetin	CA13	Q8N1Q1	Carbonic anhydrase XIII	Swiss Target
297	MOL000098	quercetin	AKR1A1	P14550	Aldehyde reductase	Swiss Target
298	MOL000098	quercetin	MAPT	P10636	microtubule associated protein tau	pubchem
299	MOL000098	quercetin	KDM4E	B2RXH2	Lysine-specific demethylase 4D-like	Swiss Target
300	MOL000098	quercetin	MYLK	Q15746	Myosin light chain kinase, smooth muscle	Swiss Target
301	MOL000098	quercetin	APEX1	P27695	DNA-(apurinic or apyrimidinic site) lyase	Swiss Target
302	MOL000098	quercetin	CDK5R1	Q15078	Cyclin-dependent kinase 5 activator 1	Pubchem/Swiss Target
303	MOL000098	quercetin	CDK1	P06493	Cyclin-dependent kinase 1	Pubchem/Swiss Target
304	MOL000098	quercetin	CCNB1	P14635	G2/mitotic-specific cyclin-B1	Pubchem/Swiss Target
305	MOL000098	quercetin	CCNB2	O95067	G2/mitotic-specific cyclin-B2	pubchem
306	MOL000098	quercetin	CCNB3	Q8WWL7	G2/mitotic-specific cyclin-B3	Pubchem/Swiss Target
307	MOL000098	quercetin	ARG1	P05089	Arginase-1	Swiss Target
308	MOL000098	quercetin	PTPRS	Q13332	Receptor-type tyrosine-protein phosphatase S	Swiss Target
309	MOL000098	quercetin	ESR2	Q92731	Estrogen receptor beta	Pubchem/TCMSP/Swiss Target
310	MOL000098	quercetin	MPG	P29372	DNA-3-methyladenine glycosylase	Swiss Target
311	MOL000098	quercetin	SLC22A12	Q96S37	Solute carrier family 22 member 12	Swiss Target
312	MOL000098	quercetin	TYR	P14679	Tyrosinase	Pubchem/Swiss Target
313	MOL000098	quercetin	HSD17B1	P14061	Estradiol 17-beta-dehydrogenase 1	Pubchem/Swiss Target
314	MOL000098	quercetin	TTR	P02766	Transthyretin	Swiss Target
315	MOL000098	quercetin	TNKS2	Q9H2K2	Tankyrase-2	Swiss Target
316	MOL000098	quercetin	TNKS	O95271	Tankyrase-1	Swiss Target
317	MOL000098	quercetin	TERT	O14746	Telomerase reverse transcriptase	Swiss Target
318	MOL000354	isorhamnetin	CA12	O43570	carbonic anhydrase 12	Pubchem/Swiss Target
319	MOL000354	isorhamnetin	CA2	P00918	carbonic anhydrase 2	pubchem
320	MOL000354	isorhamnetin	CA4	P22748	carbonic anhydrase 4	Pubchem/Swiss Target
321	MOL000354	isorhamnetin	CA7	P43166	carbonic anhydrase 7	Pubchem/Swiss Target
322	MOL000354	isorhamnetin	CYP1A1	P04798	cytochrome P450 family 1 subfamily A member 1	Pubchem/TCMSP
323	MOL000354	isorhamnetin	CYP1A2	P05177	cytochrome P450 family 1 subfamily A member 2	Pubchem/TCMSP
324	MOL000354	isorhamnetin	CYP1B1	Q16678	cytochrome P450 family 1 subfamily B member 1	Pubchem/TCMSP/Swiss Target
325	MOL000354	isorhamnetin	NFKB1	P19838	nuclear factor kappa B subunit 1	pubchem
326	MOL000354	isorhamnetin	NFKB2	Q00653	nuclear factor kappa B subunit 2	pubchem
327	MOL000354	isorhamnetin	RELA	Q04206	RELA proto-oncogene, NF-kB subunit	Pubchem/TCMSP
328	MOL000354	isorhamnetin	XDH	P47989	xanthine dehydrogenase	Pubchem/Swiss Target
329	MOL000354	isorhamnetin	NOS2	P35228	Nitric oxide synthase, inducible	TCMSP
330	MOL000354	isorhamnetin	PTGS1	P23219	Prostaglandin G/H synthase 1	TCMSP
331	MOL000354	isorhamnetin	ESR1	P03372	Estrogen receptor	Pubchem/TCMSP/Swiss Target
332	MOL000354	isorhamnetin	AR	P10275	androgen receptor	Pubchem/TCMSP/Swiss Target
333	MOL000354	isorhamnetin	PPARG	P37231	Peroxisome proliferator activated receptor gamma	Pubchem/TCMSP/Swiss Target
334	MOL000354	isorhamnetin	PTGS2	P35354	Prostaglandin G/H synthase 2	Pubchem/TCMSP/Swiss Target
335	MOL000354	isorhamnetin	ESR2	Q92731	Estrogen receptor beta	Pubchem/TCMSP/Swiss Target
336	MOL000354	isorhamnetin	MAPK14	Q16539	Mitogen-activated protein kinase 14	TCMSP
337	MOL000354	isorhamnetin	GSK3B	P49841	glycogen synthase kinase 3 beta	Pubchem/TCMSP/Swiss Target
338	MOL000354	isorhamnetin	PRSS1	P07477	serine protease 1	Pubchem/TCMSP
339	MOL000354	isorhamnetin	CCNA2	P20248	Cyclin-A2	TCMSP
340	MOL000354	isorhamnetin	NCOA2	Q15596	Nuclear receptor coactivator 2	TCMSP
341	MOL000354	isorhamnetin	PYGM	P11217	Glycogen phosphorylase, muscle form	TCMSP
342	MOL000354	isorhamnetin	CHEK1	O14757	Serine/threonine-protein kinase Chk1	TCMSP
343	MOL000354	isorhamnetin	AKR1B1	P15121	aldo-keto reductase family 1 member B	Pubchem/TCMSP/Swiss Target
344	MOL000354	isorhamnetin	NCOA1	Q15788	Nuclear receptor coactivator 1	TCMSP
345	MOL000354	isorhamnetin	F7	P08709	Coagulation factor VII	TCMSP
346	MOL000354	isorhamnetin	ACHE	P22303	acetylcholinesterase	Pubchem/TCMSP/Swiss Target
347	MOL000354	isorhamnetin	GABRA1	P14867	Gamma-aminobutyric acid receptor subunit alpha-1	TCMSP
348	MOL000354	isorhamnetin	MAOB	P56560	monoamine oxidase B	Pubchem/Swiss Target
349	MOL000354	isorhamnetin	GRIA2	P42262	Glutamate receptor 2	TCMSP
350	MOL000354	isorhamnetin	NCF1	P14598	Neutrophil cytosol factor 1	TCMSP
351	MOL000354	isorhamnetin	OLR1	P78380	Oxidized low-density lipoprotein receptor 1	TCMSP
352	MOL000354	isorhamnetin	ABCC1	P33527	ATP binding cassette subfamily C member 1	Pubchem/Swiss Target
353	MOL000354	isorhamnetin	NOX4	Q9NPH5	NADPH oxidase 4	Pubchem/Swiss Target
354	MOL000354	isorhamnetin	ABCG2	Q9UNQ0	ATP binding cassette subfamily G member 2	Pubchem/TCMSP/Swiss Target
355	MOL000354	isorhamnetin	IGF1R	P08069	insulin like growth factor 1 receptor	Pubchem/Swiss Target
356	MOL000354	isorhamnetin	EGFR	P35968	epidermal growth factor receptor	Pubchem/TCMSP/Swiss Target
357	MOL000354	isorhamnetin	ALOX15	P12530	arachidonate 15-lipoxygenase	Pubchem/Swiss Target
358	MOL000354	isorhamnetin	ALOX12	P18054	arachidonate 12-lipoxygenase, 12S type	Pubchem/Swiss Target
359	MOL000354	isorhamnetin	AVPR2	P30518	arginine vasopressin receptor 2	Pubchem
360	MOL000354	isorhamnetin	MAOA	P21398	monoamine oxidase A	pubchem
361	MOL000354	isorhamnetin	FLT3	P36888	fms related tyrosine kinase 3	Pubchem
362	MOL000354	isorhamnetin	CYP19A1	P11511	cytochrome P450 family 19 subfamily A member 1	Pubchem/Swiss Target
363	MOL000354	isorhamnetin	F2	P00734	coagulation factor II, thrombin	Pubchem/Swiss Target
364	MOL000354	isorhamnetin	PIM1	P11309	Pim-1 proto-oncogene, serine/threonine kinase	Pubchem/Swiss Target
365	MOL000354	isorhamnetin	ALOX5	P12527	arachidonate 5-lipoxygenase	Pubchem/TCMSP/Swiss Target
366	MOL000354	isorhamnetin	AURKB	Q96GD4	aurora kinase B	Pubchem/Swiss Target
367	MOL000354	isorhamnetin	DRD4	P21917	D(4) dopamine receptor	Pubchem/Swiss Target
368	MOL000354	isorhamnetin	ADORA1	P30542	Adenosine A1 receptor	Swiss Target
369	MOL000354	isorhamnetin	GLO1	Q04760	glyoxalase I	Pubchem/Swiss Target
370	MOL000354	isorhamnetin	MPO	P05164	myeloperoxidase	Pubchem/TCMSP/Swiss Target
371	MOL000354	isorhamnetin	PIK3R1	P27986	phosphoinositide-3-kinase regulatory subunit 1	Pubchem/Swiss Target
372	MOL000354	isorhamnetin	ADORA2A	P29274	Adenosine A2a receptor	Swiss Target
373	MOL000354	isorhamnetin	DAPK1	P53355	death associated protein kinase 1	Pubchem/Swiss Target
374	MOL000354	isorhamnetin	PYGL	P06737	glycogen phosphorylase L	Pubchem/Swiss Target
375	MOL000354	isorhamnetin	CA1	P00915	carbonic anhydrase 1	Pubchem/Swiss Target
376	MOL000354	isorhamnetin	SRC	P12931	SRC proto-oncogene, non-receptor tyrosine kinase	Swiss Target
377	MOL000354	isorhamnetin	PTK2	Q05397	protein tyrosine kinase 2	Pubchem/Swiss Target
378	MOL000354	isorhamnetin	HSD17B2	P37059	hydroxysteroid 17-beta dehydrogenase 2	Pubchem/Swiss Target
379	MOL000354	isorhamnetin	KDR	P35968	kinase insert domain receptor	pubchem
380	MOL000354	isorhamnetin	MMP13	P45452	matrix metallopeptidase 13	Pubchem/Swiss Target
381	MOL000354	isorhamnetin	MMP3	P08254	matrix metallopeptidase 3	Pubchem/TCMSP/Swiss Target
382	MOL000354	isorhamnetin	CA3	P07451	carbonic anhydrase 3	Pubchem/Swiss Target
383	MOL000354	isorhamnetin	PLK1	P53350	polo like kinase 1	Pubchem/Swiss Target
384	MOL000354	isorhamnetin	CA6	P23280	carbonic anhydrase 6	Pubchem/Swiss Target
385	MOL000354	isorhamnetin	CDK1	P06493	Cyclin-dependent kinase 1	Pubchem/Swiss Target
386	MOL000354	isorhamnetin	MMP9	P14780	matrix metallopeptidase 9	Pubchem/TCMSP/Swiss Target
387	MOL000354	isorhamnetin	MMP2	P08253	matrix metallopeptidase 2	Pubchem/TCMSP/Swiss Target
388	MOL000354	isorhamnetin	PKN1	Q16512	protein kinase N1	Pubchem/Swiss Target
389	MOL000354	isorhamnetin	CA14	Q9ULX7	carbonic anhydrase 14	Pubchem/Swiss Target
390	MOL000354	isorhamnetin	CA9	Q16790	carbonic anhydrase 9	Pubchem/Swiss Target
391	MOL000354	isorhamnetin	CSNK2A1	P68400	casein kinase 2 alpha 1	Pubchem/Swiss Target
392	MOL000354	isorhamnetin	MET	P08581	MET proto-oncogene, receptor tyrosine kinase	pubchem
393	MOL000354	isorhamnetin	NEK2	P51955	NIMA related kinase 2	Pubchem/Swiss Target
394	MOL000354	isorhamnetin	CXCR1	P25024	C-X-C motif chemokine receptor 1	Pubchem/Swiss Target
395	MOL000354	isorhamnetin	CAMK2B	Q13554	calcium/calmodulin dependent protein kinase II beta	pubchem
396	MOL000354	isorhamnetin	ALK	Q9UM73	ALK receptor tyrosine kinase	Pubchem/Swiss Target
397	MOL000354	isorhamnetin	AKT1	P31749	AKT serine/threonine kinase 1	Pubchem/TCMSP/Swiss Target
398	MOL000354	isorhamnetin	ABCB1	P08183	ATP binding cassette subfamily B member 1	Pubchem/Swiss Target
399	MOL000354	isorhamnetin	NEK6	Q9HC98	NIMA related kinase 6	Pubchem/Swiss Target
400	MOL000354	isorhamnetin	PLA2G1B	P04054	phospholipase A2 group IB	Pubchem/Swiss Target
401	MOL000354	isorhamnetin	CA5A	P35218	carbonic anhydrase 5A	Pubchem/Swiss Target
402	MOL000354	isorhamnetin	BACE1	P56817	beta-secretase 1	Pubchem/Swiss Target
403	MOL000354	isorhamnetin	AXL	P30530	AXL receptor tyrosine kinase	Pubchem
404	MOL000354	isorhamnetin	NUAK1	O60285	NUAK family kinase 1	Pubchem/Swiss Target
405	MOL000354	isorhamnetin	AKR1C2	P52895	Aldo-keto reductase family 1 member C2	Swiss Target
406	MOL000354	isorhamnetin	AKR1C1	Q04828	Aldo-keto reductase family 1 member C1	Swiss Target
407	MOL000354	isorhamnetin	AKR1C3	P42330	Aldo-keto-reductase family 1 member C3	TCMSP/Swiss Target
408	MOL000354	isorhamnetin	AKR1C4	P17516	Aldo-keto reductase family 1 member C4	Swiss Target
409	MOL000354	isorhamnetin	CA13	Q8N1Q1	Carbonic anhydrase XIII	Swiss Target
410	MOL000354	isorhamnetin	AKR1A1	P14550	Aldehyde reductase	Swiss Target
411	MOL000354	isorhamnetin	GPR35	Q9HC97	G protein-coupled receptor 35	Pubchem/Swiss Target
412	MOL000354	isorhamnetin	MAPT	P10636	microtubule associated protein tau	pubchem
413	MOL000354	isorhamnetin	KDM4E	B2RXH2	Lysine-specific demethylase 4D-like	Swiss Target
414	MOL000354	isorhamnetin	TOP2A	P11388	DNA topoisomerase 2-alpha	Pubchem/TCMSP/Swiss Target
415	MOL000354	isorhamnetin	INSR	P06213	Insulin receptor	Pubchem/TCMSP/Swiss Target
416	MOL000354	isorhamnetin	MYLK	Q15746	Myosin light chain kinase, smooth muscle	Swiss Target
417	MOL000354	isorhamnetin	SYK	P43405	spleen associated tyrosine kinase	Pubchem/TCMSP
418	MOL000354	isorhamnetin	PIK3CG	P48736	phosphatidylinositol-4,5-bisphosphate 3-kinase catalytic subunit gamma	Pubchem/Swiss Target
419	MOL000354	isorhamnetin	APEX1	P27695	DNA-(apurinic or apyrimidinic site) lyase	Swiss Target
420	MOL000354	isorhamnetin	CDK5	Q00535	cyclin dependent kinase 5	Pubchem/Swiss Target
421	MOL000354	isorhamnetin	CDK5R1	Q15078	Cyclin-dependent kinase 5 activator 1	Pubchem/Swiss Target
422	MOL000354	isorhamnetin	CCNB1	P14635	cyclin B1	Pubchem/TCMSP/Swiss Target
423	MOL000354	isorhamnetin	CCNB2	O95067	cyclin B2	Pubchem/Swiss Target
424	MOL000354	isorhamnetin	CCNB3	Q8WWL7	cyclin B3	Pubchem/Swiss Target
425	MOL000354	isorhamnetin	CDK6	Q00534	cyclin dependent kinase 6	Pubchem/Swiss Target
426	MOL000354	isorhamnetin	CDK2	P24941	cyclin dependent kinase 2	Pubchem/Swiss Target
427	MOL000354	isorhamnetin	ARG1	P05089	Arginase-1	Swiss Target
428	MOL000354	isorhamnetin	APP	P05067	amyloid beta precursor protein	Pubchem/Swiss Target
429	MOL000354	isorhamnetin	MCL1	Q07820	Induced myeloid leukemia cell differentiation protein Mcl-1	Swiss Target
430	MOL000354	isorhamnetin	TERT	O14746	Telomerase reverse transcriptase	Swiss Target
431	MOL000354	isorhamnetin	TYR	P14679	Tyrosinase	Pubchem/Swiss Target
432	MOL000354	isorhamnetin	HSD17B1	P14061	Estradiol 17-beta-dehydrogenase 1	Pubchem/Swiss Target
433	MOL000354	isorhamnetin	AHR	P35869	aryl hydrocarbon receptor	Pubchem/TCMSP/Swiss Target
434	MOL000354	isorhamnetin	ESRRA	P11474	estrogen related receptor alpha	Pubchem/Swiss Target
435	MOL000354	isorhamnetin	PTPRS	Q13332	Receptor-type tyrosine-protein phosphatase S	Swiss Target
436	MOL000354	isorhamnetin	PLG	P00747	Plasminogen	Swiss Target
437	MOL000354	isorhamnetin	MPG	P29372	DNA-3-methyladenine glycosylase	Swiss Target
438	MOL000354	isorhamnetin	SLC22A12	Q96S37	Solute carrier family 22 member 12	Swiss Target
439	MOL000354	isorhamnetin	PARP1	P09874	Poly [ADP-ribose] polymerase 1	TCMSP
440	MOL000354	isorhamnetin	TTR	P02766	Transthyretin	Swiss Target
441	MOL000354	isorhamnetin	MMP12	P39900	matrix metallopeptidase 12	Pubchem/Swiss Target
442	MOL000354	isorhamnetin	CD38	P28907	CD38 molecule	Pubchem/Swiss Target
443	MOL000354	isorhamnetin	AKR1B10	O60218	aldo-keto reductase family 1 member B10	Pubchem/Swiss Target
444	MOL000354	isorhamnetin	TNKS2	Q9H2K2	Tankyrase-2	Swiss Target
445	MOL000359	sitosterol	DPP4	P27487	dipeptidyl peptidase 4	Pubchem
446	MOL000359	sitosterol	F2	P00734	coagulation factor II, thrombin	Pubchem/Swiss Target
447	MOL000359	sitosterol	GSK3B	P49841	glycogen synthase kinase 3 beta	Pubchem/TCMSP/Swiss Target
448	MOL000359	sitosterol	POLB	P06746	DNA polymerase beta	Pubchem/Swiss Target
449	MOL000359	sitosterol	PRKAA1	Q13131	5'-AMP-activated protein kinase catalytic subunit alpha-1, AMPK subunit alpha-1	Pubchem
450	MOL000359	sitosterol	PRKAA2	P54646	5'-AMP-activated protein kinase catalytic subunit alpha-2	Pubchem
451	MOL000359	sitosterol	PRKAB1	Q9Y478	5'-AMP-activated protein kinase subunit beta-1	Pubchem
452	MOL000359	sitosterol	PRKAB2	O43741	5'-AMP-activated protein kinase subunit beta-2	Pubchem
453	MOL000359	sitosterol	PRKAG1	P54619	5'-AMP-activated protein kinase subunit gamma-1	Pubchem
454	MOL000359	sitosterol	PRKAG2	Q9UGJ0	5'-AMP-activated protein kinase subunit gamma-2	Pubchem
455	MOL000359	sitosterol	PRKAG3	Q9UGI9	5'-AMP-activated protein kinase subunit gamma-3	Pubchem
456	MOL000359	sitosterol	PGR	P06401	progesterone receptor	Pubchem/TCMSP
457	MOL000359	sitosterol	NCOA2	Q15596	Nuclear receptor coactivator 2	TCMSP
458	MOL000359	sitosterol	NR3C2	P08235	Mineralocorticoid receptor	TCMSP
459	MOL000359	sitosterol	AR	P10275	androgen receptor	Pubchem/TCMSP/Swiss Target
460	MOL000359	sitosterol	HMGCR	P00347	3-hydroxy-3-methylglutaryl-coenzyme A reductase	Swiss Target
461	MOL000359	sitosterol	CYP51A1	Q16850	Lanosterol 14-alpha demethylase	Swiss Target
462	MOL000359	sitosterol	NPC1L1	Q9UHC9	NPC1-like intracellular cholesterol transporter 1	Swiss Target
463	MOL000359	sitosterol	NR1H3	Q13133	Oxysterols receptor LXR-alpha	Swiss Target
464	MOL000359	sitosterol	CYP19A1	P11511	cytochrome P450 family 19 subfamily A member 1	Pubchem/Swiss Target
465	MOL000359	sitosterol	CYP17A1	P05093	Steroid 17-alpha-hydroxylase/17	Swiss Target
466	MOL000359	sitosterol	RORC	P51449	Nuclear receptor ROR-gamma	Swiss Target
467	MOL000359	sitosterol	ESR1	P03372	Estrogen receptor	Pubchem/TCMSP/Swiss Target
468	MOL000359	sitosterol	ESR2	Q92731	Estrogen receptor beta	Pubchem/TCMSP/Swiss Target
469	MOL000359	sitosterol	SREBF2	Q12772	Sterol regulatory element-binding protein 2	Swiss Target
470	MOL000359	sitosterol	SHBG	P04278	Sex hormone-binding globulin	Swiss Target
471	MOL000359	sitosterol	SLC6A2	P23975	Norepinephrine transporter	TCMSP/Swiss Target
472	MOL000359	sitosterol	CYP2C19	P33261	cytochrome P450 family 2 subfamily C member 19	Pubchem/Swiss Target
473	MOL000359	sitosterol	RORA	P35398	Nuclear receptor ROR-alpha	Swiss Target
474	MOL000359	sitosterol	PTPN1	P18031	protein tyrosine phosphatase non-receptor type 1	Pubchem/Swiss Target
475	MOL000359	sitosterol	BCHE	P06276	Butyrylcholinesterase	Pubchem/Swiss Target
476	MOL000359	sitosterol	SERPINA6	P08185	Corticosteroid-binding globulin	Swiss Target
477	MOL000359	sitosterol	SLC6A4	P31645	Sodium-dependent serotonin transporter	Swiss Target
478	MOL000359	sitosterol	CHRM2	P08172	Muscarinic acetylcholine receptor M2	Pubchem/TCMSP/Swiss Target
479	MOL000359	sitosterol	VDR	P11473	Vitamin D3 receptor	Swiss Target
480	MOL000359	sitosterol	ACHE	P22303	acetylcholinesterase	Pubchem/TCMSP/Swiss Target
481	MOL000359	sitosterol	G6PD	P11413	Glucose-6-phosphate 1-dehydrogenase	Swiss Target
482	MOL000359	sitosterol	NR1H2	P55055	Oxysterols receptor LXR-beta	Swiss Target
483	MOL000359	sitosterol	GLRA1	P23415	Glycine receptor subunit alpha-1	Swiss Target
484	MOL000359	sitosterol	CES2	O00748	Cocaine esterase	Swiss Target
485	MOL000359	sitosterol	PTGER1	P34995	Prostaglandin E2 receptor EP1 subtype	Swiss Target
486	MOL000359	sitosterol	PTGER2	P43116	Prostaglandin E2 receptor EP2 subtype	Swiss Target
487	MOL000359	sitosterol	HSD11B1	P28845	Corticosteroid 11-beta-dehydrogenase isozyme 1	Swiss Target
488	MOL000359	sitosterol	PTGES	O14684	Prostaglandin E synthase	Swiss Target
489	MOL000359	sitosterol	CDC25A	P30304	M-phase inducer phosphatase 1	Swiss Target
490	MOL000359	sitosterol	PPARA	Q07869	Peroxisome proliferator-activated receptor alpha	TCMSP/Swiss Target
491	MOL000359	sitosterol	PPARD	Q03181	Peroxisome proliferator-activated receptor delta	TCMSP/Swiss Target
492	MOL000359	sitosterol	DHCR7	Q9UBM7	7-dehydrocholesterol reductase	Swiss Target
493	MOL000359	sitosterol	SQLE	Q14534	Squalene monooxygenase	Swiss Target
494	MOL000359	sitosterol	PTPN6	P29350	Tyrosine-protein phosphatase non-receptor type 6	Swiss Target
495	MOL000359	sitosterol	NR1I3	Q14994	Nuclear receptor subfamily 1 group I member 3	Pubchem/TCMSP/Swiss Target
496	MOL000359	sitosterol	FDFT1	P37268	Squalene synthase	Swiss Target
497	MOL000359	sitosterol	SIGMAR1	Q99720	Sigma non-opioid intracellular receptor 1	Swiss Target
498	MOL000359	sitosterol	NOS2	P35228	Nitric oxide synthase, inducible	TCMSP
499	MOL000359	sitosterol	NR3C1	P04150	nuclear receptor subfamily 3 group C member 1	Pubchem/Swiss Target
500	MOL000359	sitosterol	PPARG	P37231	Peroxisome proliferator activated receptor gamma	Pubchem/TCMSP/Swiss Target
501	MOL000359	sitosterol	CDC25B	P30305	M-phase inducer phosphatase 2	Swiss Target
502	MOL000359	sitosterol	UGT2B7	Q62789	UDP-glucuronosyltransferase 2B7	Swiss Target
503	MOL000359	sitosterol	HSD11B2	P80365	Corticosteroid 11-beta-dehydrogenase isozyme 2	Swiss Target
504	MOL000422	kaempferol	ABCB1	P08183	ATP binding cassette subfamily B member 1	Pubchem/Swiss Target
505	MOL000422	kaempferol	ABCC1	P33527	ATP binding cassette subfamily C member 1	Pubchem/Swiss Target
506	MOL000422	kaempferol	ABCG2	Q9UNQ0	ATP binding cassette subfamily G member 2	Pubchem/TCMSP/Swiss Target
507	MOL000422	kaempferol	ADAM10	O14672	ADAM metallopeptidase domain 10	Pubchem
508	MOL000422	kaempferol	ADAM17	P78536	ADAM metallopeptidase domain 17	Pubchem
509	MOL000422	kaempferol	AHR	P35869	aryl hydrocarbon receptor	Pubchem/TCMSP/Swiss Target
510	MOL000422	kaempferol	AKR1B1	P15121	aldo-keto reductase family 1 member B	Pubchem/TCMSP/Swiss Target
511	MOL000422	kaempferol	ALOX5	P12527	arachidonate 5-lipoxygenase	Pubchem/TCMSP/Swiss Target
512	MOL000422	kaempferol	APP	P05067	amyloid beta precursor protein	Pubchem/Swiss Target
513	MOL000422	kaempferol	AR	P10275	androgen receptor	Pubchem/TCMSP/Swiss Target
514	MOL000422	kaempferol	BACE1	P56817	beta-secretase 1	Pubchem/Swiss Target
515	MOL000422	kaempferol	BCHE	P06276	Butyrylcholinesterase	Pubchem/Swiss Target
516	MOL000422	kaempferol	CA12	O43570	carbonic anhydrase 12	Pubchem/Swiss Target
517	MOL000422	kaempferol	CA2	P00918	carbonic anhydrase 2	pubchem
518	MOL000422	kaempferol	CA7	P43166	carbonic anhydrase 7	Pubchem/Swiss Target
519	MOL000422	kaempferol	CCNB1	P14635	cyclin B1	Pubchem/TCMSP/Swiss Target
520	MOL000422	kaempferol	CCNB2	O95067	cyclin B2	Pubchem/Swiss Target
521	MOL000422	kaempferol	CCNB3	Q8WWL7	cyclin B3	Pubchem/Swiss Target
522	MOL000422	kaempferol	CDK1	P06493	Cyclin-dependent kinase 1	Pubchem/Swiss Target
523	MOL000422	kaempferol	CDK6	Q00534	cyclin dependent kinase 6	Pubchem/Swiss Target
524	MOL000422	kaempferol	CHRM1	P11229	cholinergic receptor muscarinic 1	Pubchem/TCMSP
525	MOL000422	kaempferol	CISD1	Q9NZ45	CDGSH iron sulfur domain 1	Pubchem
526	MOL000422	kaempferol	CLK1	P49759	CDC like kinase 1	Pubchem
527	MOL000422	kaempferol	CSNK2A1	P68400	casein kinase 2 alpha 1	Pubchem/Swiss Target
528	MOL000422	kaempferol	CSNK2A2	P19784	casein kinase 2 alpha 2	Pubchem
529	MOL000422	kaempferol	CSNK2B	P67870	casein kinase 2 beta	Pubchem
530	MOL000422	kaempferol	CTDSP1	Q9GZU7	CTD small phosphatase 1	Pubchem
531	MOL000422	kaempferol	CYP19A1	P11511	cytochrome P450 family 19 subfamily A member 1	Pubchem/Swiss Target
532	MOL000422	kaempferol	CYP1A1	P04798	cytochrome P450 family 1 subfamily A member 1	Pubchem/TCMSP
533	MOL000422	kaempferol	CYP1A2	P05177	cytochrome P450 family 1 subfamily A member 2	Pubchem/TCMSP
534	MOL000422	kaempferol	CYP1B1	Q16678	cytochrome P450 family 1 subfamily B member 1	Pubchem/TCMSP/Swiss Target
535	MOL000422	kaempferol	CYP2C9	P11712	cytochrome P450 family 2 subfamily C member 9	Pubchem
536	MOL000422	kaempferol	CYP2D6	P10635	cytochrome P450 family 2 subfamily D member 6	Pubchem
537	MOL000422	kaempferol	CYP3A4	P08684	cytochrome P450 family 3 subfamily A member 4	Pubchem/TCMSP
538	MOL000422	kaempferol	DAPK1	P53355	death associated protein kinase 1	Pubchem/Swiss Target
539	MOL000422	kaempferol	DPP4	P27487	dipeptidyl peptidase 4	Pubchem
540	MOL000422	kaempferol	ESR1	P03372	Estrogen receptor	Pubchem/TCMSP/Swiss Target
541	MOL000422	kaempferol	ESR2	Q92731	Estrogen receptor beta	Pubchem/TCMSP/Swiss Target
542	MOL000422	kaempferol	ESRRA	P11474	estrogen related receptor alpha	Pubchem/Swiss Target
543	MOL000422	kaempferol	FLT3	P36888	fms related tyrosine kinase 3	Pubchem
544	MOL000422	kaempferol	GLI3	AAI13617	GLI family zinc finger 3	Pubchem
545	MOL000422	kaempferol	GLO1	Q04760	glyoxalase I	Pubchem/Swiss Target
546	MOL000422	kaempferol	GSK3A	P49840	glycogen synthase kinase 3 alpha	pubchem
547	MOL000422	kaempferol	GSK3B	P49841	glycogen synthase kinase 3 beta	Pubchem/TCMSP/Swiss Target
548	MOL000422	kaempferol	HDAC9	Q9UKV0	histone deacetylase 9	pubchem
549	MOL000422	kaempferol	HIF1A	Q16665	hypoxia inducible factor 1 subunit alpha	pubchem
550	MOL000422	kaempferol	HPGD	P15428	15-hydroxyprostaglandin dehydrogenase	pubchem
551	MOL000422	kaempferol	HSD17B1	P14061	Estradiol 17-beta-dehydrogenase 1	Pubchem/Swiss Target
552	MOL000422	kaempferol	HSD17B2	P37059	hydroxysteroid 17-beta dehydrogenase 2	Pubchem/Swiss Target
553	MOL000422	kaempferol	MAPT	P10636	microtubule associated protein tau	pubchem
554	MOL000422	kaempferol	MPO	P05164	myeloperoxidase	Pubchem/TCMSP/Swiss Target
555	MOL000422	kaempferol	NFE2L2	Q16236	Nuclear factor erythroid 2-related factor 2	Pubchem/TCMSP
556	MOL000422	kaempferol	NFKB1	P19838	nuclear factor kappa B subunit 1	pubchem
557	MOL000422	kaempferol	NFKB2	Q00653	nuclear factor kappa B subunit 2	pubchem
558	MOL000422	kaempferol	NOX4	Q9NPH5	NADPH oxidase 4	Pubchem/Swiss Target
559	MOL000422	kaempferol	NR1I2	O75469	nuclear receptor subfamily 1 group I member 2	pubchem
560	MOL000422	kaempferol	NR1I3	Q14994	Nuclear receptor subfamily 1 group I member 3	Pubchem/TCMSP/Swiss Target
561	MOL000422	kaempferol	NR3C1	P04150	Glucocorticoid receptor	pubchem
562	MOL000422	kaempferol	PAFAH1B3	Q15102	platelet activating factor acetylhydrolase 1b catalytic subunit 3	pubchem
563	MOL000422	kaempferol	PGR	P06401	progesterone receptor	Pubchem/TCMSP
564	MOL000422	kaempferol	PIM2	Q9P1W9	Pim-2 proto-oncogene, serine/threonine kinase	pubchem
565	MOL000422	kaempferol	PIP4K2A	P48426	phosphatidylinositol-5-phosphate 4-kinase type 2 alpha	pubchem
566	MOL000422	kaempferol	POLH	Q9Y253	DNA polymerase eta	pubchem
567	MOL000422	kaempferol	POLI	Q9UNA4	DNA polymerase iota	pubchem
568	MOL000422	kaempferol	PPARG	P37231	Peroxisome proliferator-activated receptor gamma	TCMSP
569	MOL000422	kaempferol	RACGAP1	Q9H0H5	Rac GTPase activating protein 1	pubchem
570	MOL000422	kaempferol	RARA	P10276	retinoic acid receptor alpha	pubchem
571	MOL000422	kaempferol	RELA	Q04206	RELA proto-oncogene, NF-kB subunit	Pubchem/TCMSP
572	MOL000422	kaempferol	SIAE	Q9HAT2	sialic acid acetylesterase	pubchem
573	MOL000422	kaempferol	SLC2A1	P11166	solute carrier family 2 member 1	pubchem
574	MOL000422	kaempferol	SMAD2	Q15796	SMAD family member 2	pubchem
575	MOL000422	kaempferol	SMAD3	P84022	SMAD family member 3	pubchem
576	MOL000422	kaempferol	STK16	O75716	serine/threonine kinase 16	pubchem
577	MOL000422	kaempferol	TYR	P14679	Tyrosinase	Pubchem/Swiss Target
578	MOL000422	kaempferol	XDH	P47989	xanthine dehydrogenase	Pubchem/Swiss Target
579	MOL000422	kaempferol	NOS2	P35228	Nitric oxide synthase, inducible	TCMSP
580	MOL000422	kaempferol	PTGS1	P23219	Prostaglandin G/H synthase 1	TCMSP
581	MOL000422	kaempferol	AR	P10275	androgen receptor	Pubchem/TCMSP/Swiss Target
582	MOL000422	kaempferol	PPARG	P37231	Peroxisome proliferator activated receptor gamma	Pubchem/TCMSP/Swiss Target
583	MOL000422	kaempferol	PTGS2	P35354	Prostaglandin G/H synthase 2	Pubchem/TCMSP/Swiss Target
584	MOL000422	kaempferol	NCOA2	Q15596	Nuclear receptor coactivator 2	TCMSP
585	MOL000422	kaempferol	PRSS1	P07477	serine protease 1	Pubchem/TCMSP
586	MOL000422	kaempferol	ACHE	P22303	acetylcholinesterase	Pubchem/TCMSP/Swiss Target
587	MOL000422	kaempferol	SLC6A2	P23975	Norepinephrine transporter	TCMSP/Swiss Target
588	MOL000422	kaempferol	CHRM2	P08172	Muscarinic acetylcholine receptor M2	Pubchem/TCMSP/Swiss Target
589	MOL000422	kaempferol	ADRA1B	P35368	Alpha-1B adrenergic receptor	TCMSP
590	MOL000422	kaempferol	GABRA1	P14867	Gamma-aminobutyric acid receptor subunit alpha-1	TCMSP
591	MOL000422	kaempferol	F7	P08709	Coagulation factor VII	TCMSP
592	MOL000422	kaempferol	IKBKB	O14920	Inhibitor of nuclear factor kappa-B kinase subunit beta	TCMSP
593	MOL000422	kaempferol	AKT1	P31749	AKT serine/threonine kinase 1	Pubchem/TCMSP/Swiss Target
594	MOL000422	kaempferol	BCL2	Q92934	Apoptosis regulator Bcl-2	TCMSP
595	MOL000422	kaempferol	BAX	Q07812	Apoptosis regulator BAX	TCMSP
596	MOL000422	kaempferol	TNFSF15	O95150	Tumor necrosis factor	TCMSP
597	MOL000422	kaempferol	JUN	P05412	Transcription factor AP-1	TCMSP
598	MOL000422	kaempferol	AHSA1	O95433	Activator of 90 kDa heat shock protein ATPase homolog 1	TCMSP
599	MOL000422	kaempferol	CASP3	P42574	Caspase-3	TCMSP
600	MOL000422	kaempferol	MAPK8	P45983	Mitogen-activated protein kinase 8	TCMSP
601	MOL000422	kaempferol	MMP1	P03956	Interstitial collagenase	TCMSP
602	MOL000422	kaempferol	STAT1	P42224	Signal transducer and activator of transcription 1-alpha/beta	TCMSP
603	MOL000422	kaempferol	HMOX1	P09601	Heme oxygenase 1	TCMSP
604	MOL000422	kaempferol	CYP1A2	P05177	cytochrome P450 family 1 subfamily A member 2	Pubchem/TCMSP
605	MOL000422	kaempferol	ICAM1	P05362	Intercellular adhesion molecule 1	TCMSP
606	MOL000422	kaempferol	SELE	P16581	E-selectin	TCMSP
607	MOL000422	kaempferol	VCAM1	P19320	Vascular cell adhesion protein 1	TCMSP
608	MOL000422	kaempferol	ALOX5	P12527	arachidonate 5-lipoxygenase	Pubchem/TCMSP/Swiss Target
609	MOL000422	kaempferol	HAS2	Q92819	Hyaluronan synthase 2	TCMSP
610	MOL000422	kaempferol	GSTP1	P09211	Glutathione S-transferase P	TCMSP
611	MOL000422	kaempferol	AHR	P35869	aryl hydrocarbon receptor	Pubchem/TCMSP/Swiss Target
612	MOL000422	kaempferol	PSMD3	O43242	26S proteasome non-ATPase regulatory subunit 3	TCMSP
613	MOL000422	kaempferol	SLC2A4	Q9NR83	Solute carrier family 2, facilitated glucose transporter member 4	TCMSP
614	MOL000422	kaempferol	INSR	P06213	Insulin receptor	Pubchem/TCMSP/Swiss Target
615	MOL000422	kaempferol	DIO1	P49895	Type I iodothyronine deiodinase	TCMSP
616	MOL000422	kaempferol	PPP3CA	Q08209	Serine/threonine-protein phosphatase 2B catalytic subunit alpha isoform	TCMSP
617	MOL000422	kaempferol	GSTM1	P09488	Glutathione S-transferase Mu 1	TCMSP
618	MOL000422	kaempferol	GSTM2	P28161	Glutathione S-transferase Mu 2	TCMSP
619	MOL000422	kaempferol	AKR1C3	P42330	Aldo-keto-reductase family 1 member C3	TCMSP/Swiss Target
620	MOL000422	kaempferol	SLPI	P03973	Antileukoproteinase	TCMSP
621	MOL000422	kaempferol	AKR1B1	P15121	aldo-keto reductase family 1 member B	Pubchem/TCMSP/Swiss Target
622	MOL000422	kaempferol	CA12	O43570	carbonic anhydrase 12	Pubchem/Swiss Target
623	MOL000422	kaempferol	ABCB1	P08183	ATP binding cassette subfamily B member 1	Pubchem/Swiss Target
624	MOL000422	kaempferol	ABCG2	Q9UNQ0	ATP binding cassette subfamily G member 2	Pubchem/TCMSP/Swiss Target
625	MOL000422	kaempferol	ADORA1	P30542	Adenosine A1 receptor	Swiss Target
626	MOL000422	kaempferol	CA4	P22748	carbonic anhydrase 4	Pubchem/Swiss Target
627	MOL000422	kaempferol	MAOA	P21398	monoamine oxidase A	pubchem
628	MOL000422	kaempferol	SYK	P43405	spleen associated tyrosine kinase	Pubchem/TCMSP
629	MOL000422	kaempferol	MMP9	P14780	matrix metallopeptidase 9	Pubchem/TCMSP/Swiss Target
630	MOL000422	kaempferol	MMP2	P08253	matrix metallopeptidase 2	Pubchem/TCMSP/Swiss Target
631	MOL000422	kaempferol	ALOX15	P12530	arachidonate 15-lipoxygenase	Pubchem/Swiss Target
632	MOL000422	kaempferol	ALOX12	P18054	arachidonate 12-lipoxygenase, 12S type	Pubchem/Swiss Target
633	MOL000422	kaempferol	PTPRS	Q13332	Receptor-type tyrosine-protein phosphatase S	Swiss Target
634	MOL000422	kaempferol	ADORA2A	P29274	Adenosine A2a receptor	Swiss Target
635	MOL000422	kaempferol	CDK5R1	Q15078	cyclin dependent kinase 5 regulatory subunit 1	Pubchem/Swiss Target
636	MOL000422	kaempferol	CDK5	Q00535	cyclin dependent kinase 5	Pubchem/Swiss Target
637	MOL000422	kaempferol	CCNB1	P14635	cyclin B1	Pubchem/TCMSP/Swiss Target
638	MOL000422	kaempferol	CCNB3	Q8WWL7	cyclin B3	Pubchem/Swiss Target
639	MOL000422	kaempferol	ARG1	P05089	Arginase-1	Swiss Target
640	MOL000422	kaempferol	GPR35	Q9HC97	G protein-coupled receptor 35	Pubchem/Swiss Target
641	MOL000422	kaempferol	MPG	P29372	DNA-3-methyladenine glycosylase	Swiss Target
642	MOL000422	kaempferol	SLC22A12	Q96S37	Solute carrier family 22 member 12	Swiss Target
643	MOL000422	kaempferol	CDK6	Q00534	cyclin dependent kinase 6	Pubchem/Swiss Target
644	MOL000422	kaempferol	CDK2	P24941	cyclin dependent kinase 2	Pubchem/Swiss Target
645	MOL000422	kaempferol	TTR	P02766	Transthyretin	Swiss Target
646	MOL000422	kaempferol	AKR1B10	O60218	aldo-keto reductase family 1 member B10	Pubchem/Swiss Target
647	MOL000422	kaempferol	TNKS2	Q9H2K2	Tankyrase-2	Swiss Target
648	MOL000422	kaempferol	TNKS	O95271	Tankyrase-1	Swiss Target
649	MOL000422	kaempferol	EGFR	P35968	epidermal growth factor receptor	Pubchem/TCMSP/Swiss Target
650	MOL000422	kaempferol	AVPR2	P30518	arginine vasopressin receptor 2	Pubchem
651	MOL000422	kaempferol	IGF1R	P08069	insulin like growth factor 1 receptor	Pubchem/Swiss Target
652	MOL000422	kaempferol	F2	P00734	coagulation factor II, thrombin	Pubchem/Swiss Target
653	MOL000422	kaempferol	PIM1	P11309	Pim-1 proto-oncogene, serine/threonine kinase	Pubchem/Swiss Target
654	MOL000422	kaempferol	AURKB	Q96GD4	aurora kinase B	Pubchem/Swiss Target
655	MOL000422	kaempferol	DRD4	P21917	D(4) dopamine receptor	Pubchem/Swiss Target
656	MOL000422	kaempferol	PIK3R1	P27986	phosphoinositide-3-kinase regulatory subunit 1	Pubchem/Swiss Target
657	MOL000422	kaempferol	PYGL	P06737	glycogen phosphorylase L	Pubchem/Swiss Target
658	MOL000422	kaempferol	CA1	P00915	carbonic anhydrase 1	Pubchem/Swiss Target
659	MOL000422	kaempferol	SRC	P12931	SRC proto-oncogene, non-receptor tyrosine kinase	Swiss Target
660	MOL000422	kaempferol	PTK2	Q05397	protein tyrosine kinase 2	Pubchem/Swiss Target
661	MOL000422	kaempferol	KDR	P35968	kinase insert domain receptor	pubchem
662	MOL000422	kaempferol	MMP13	P45452	matrix metallopeptidase 13	Pubchem/Swiss Target
663	MOL000422	kaempferol	MMP3	P08254	matrix metallopeptidase 3	Pubchem/TCMSP/Swiss Target
664	MOL000422	kaempferol	CA3	P07451	carbonic anhydrase 3	Pubchem/Swiss Target
665	MOL000422	kaempferol	PLK1	P53350	polo like kinase 1	Pubchem/Swiss Target
666	MOL000422	kaempferol	CA6	P23280	carbonic anhydrase 6	Pubchem/Swiss Target
667	MOL000422	kaempferol	CDK1	P06493	Cyclin-dependent kinase 1	Pubchem/Swiss Target
668	MOL000422	kaempferol	PKN1	Q16512	protein kinase N1	Pubchem/Swiss Target
669	MOL000422	kaempferol	CA14	Q9ULX7	carbonic anhydrase 14	Pubchem/Swiss Target
670	MOL000422	kaempferol	CA9	Q16790	carbonic anhydrase 9	Pubchem/Swiss Target
671	MOL000422	kaempferol	MET	P08581	MET proto-oncogene, receptor tyrosine kinase	pubchem
672	MOL000422	kaempferol	NEK2	P51955	NIMA related kinase 2	Pubchem/Swiss Target
673	MOL000422	kaempferol	CXCR1	P25024	C-X-C motif chemokine receptor 1	Pubchem/Swiss Target
674	MOL000422	kaempferol	CAMK2B	Q13554	calcium/calmodulin dependent protein kinase II beta	pubchem
675	MOL000422	kaempferol	ALK	Q9UM73	ALK receptor tyrosine kinase	Pubchem/Swiss Target
676	MOL000422	kaempferol	NEK6	Q9HC98	NIMA related kinase 6	Pubchem/Swiss Target
677	MOL000422	kaempferol	PLA2G1B	P04054	phospholipase A2 group IB	Pubchem/Swiss Target
678	MOL000422	kaempferol	CA5A	P35218	carbonic anhydrase 5A	Pubchem/Swiss Target
679	MOL000422	kaempferol	BACE1	P56817	beta-secretase 1	Pubchem/Swiss Target
680	MOL000422	kaempferol	AXL	P30530	AXL receptor tyrosine kinase	Pubchem
681	MOL000422	kaempferol	NUAK1	O60285	NUAK family kinase 1	Pubchem/Swiss Target
682	MOL000422	kaempferol	AKR1C2	P52895	Aldo-keto reductase family 1 member C2	Swiss Target
683	MOL000422	kaempferol	AKR1C1	Q04828	Aldo-keto reductase family 1 member C1	Swiss Target
684	MOL000422	kaempferol	AKR1C4	P17516	Aldo-keto reductase family 1 member C4	Swiss Target
685	MOL000422	kaempferol	CA13	Q8N1Q1	Carbonic anhydrase XIII	Swiss Target
686	MOL000422	kaempferol	AKR1A1	P14550	Aldehyde reductase	Swiss Target
687	MOL000422	kaempferol	PARP1	P09874	Poly [ADP-ribose] polymerase 1	TCMSP
688	MOL000422	kaempferol	MMP12	P39900	matrix metallopeptidase 12	Pubchem/Swiss Target
689	MOL000422	kaempferol	CD38	P28907	CD38 molecule	Pubchem/Swiss Target
690	MOL000422	kaempferol	TOP1	P11387	DNA topoisomerase I	Pubchem/TCMSP/Swiss Target
691	MOL000422	kaempferol	CFTR	P13569	Cystic fibrosis transmembrane conductance regulator	Swiss Target
692	MOL000422	kaempferol	PFKFB3	Q16875	6-phosphofructo-2-kinase/fructose-2,6-bisphosphatase 3	Swiss Target
693	MOL000422	kaempferol	AMY1A	P04745	amylase alpha 1A	Pubchem/Swiss Target
694	MOL000422	kaempferol	GRK6	P43250	G protein-coupled receptor kinase 6	Swiss Target
695	MOL000422	kaempferol	TERT	O14746	Telomerase reverse transcriptase	Swiss Target
696	MOL000449	Stigmasterol	POLB	P06746	DNA polymerase beta	Pubchem/Swiss Target
697	MOL000449	Stigmasterol	PGR	P06401	progesterone receptor	Pubchem/TCMSP
698	MOL000449	Stigmasterol	NR3C2	P08235	Mineralocorticoid receptor	TCMSP
699	MOL000449	Stigmasterol	NCOA2	Q15596	Nuclear receptor coactivator 2	TCMSP
700	MOL000449	Stigmasterol	ADH1C	P00326	Alcohol dehydrogenase 1C	TCMSP
701	MOL000449	Stigmasterol	RXRA	P19793	retinoid X receptor alpha	Pubchem/TCMSP
702	MOL000449	Stigmasterol	NCOA1	Q15788	Nuclear receptor coactivator 1	TCMSP
703	MOL000449	Stigmasterol	PTGS1	P23219	Prostaglandin G/H synthase 1	TCMSP
704	MOL000449	Stigmasterol	PTGS2	P35354	Prostaglandin G/H synthase 2	Pubchem/TCMSP/Swiss Target
705	MOL000449	Stigmasterol	ADRA2A	P08913	Alpha-2A adrenergic receptor	TCMSP
706	MOL000449	Stigmasterol	SLC6A2	P23975	Norepinephrine transporter	TCMSP/Swiss Target
707	MOL000449	Stigmasterol	SLC6A3	Q01959	Sodium-dependent dopamine transporter	TCMSP
708	MOL000449	Stigmasterol	ADRB2	P07550	Beta-2 adrenergic receptor	TCMSP
709	MOL000449	Stigmasterol	AKR1B1	P15121	aldo-keto reductase family 1 member B	Pubchem/TCMSP/Swiss Target
710	MOL000449	Stigmasterol	PLAU	P00749	plasminogen activator, urokinase	Pubchem/TCMSP
711	MOL000449	Stigmasterol	LTA4H	P09960	Leukotriene A-4 hydrolase	TCMSP
712	MOL000449	Stigmasterol	MAOB	P56560	monoamine oxidase B	Pubchem/Swiss Target
713	MOL000449	Stigmasterol	MAOA	P21398	monoamine oxidase A	pubchem
714	MOL000449	Stigmasterol	CTRB1	P17538	Chymotrypsinogen B	TCMSP
715	MOL000449	Stigmasterol	CHRM3	Q9ERZ3	Muscarinic acetylcholine receptor M3	TCMSP
716	MOL000449	Stigmasterol	CHRM1	P11229	cholinergic receptor muscarinic 1	Pubchem/TCMSP
717	MOL000449	Stigmasterol	ADRB1	P08588	Beta-1 adrenergic receptor	TCMSP
718	MOL000449	Stigmasterol	SCN5A	Q14524	Sodium channel protein type 5 subunit alpha	TCMSP
719	MOL000449	Stigmasterol	ADRA1A	P35348	Alpha-1A adrenergic receptor	TCMSP
720	MOL000449	Stigmasterol	CHRM2	P08172	Muscarinic acetylcholine receptor M2	Pubchem/TCMSP/Swiss Target
721	MOL000449	Stigmasterol	ADRA1B	P35368	Alpha-1B adrenergic receptor	TCMSP
722	MOL000449	Stigmasterol	GABRA1	P14867	Gamma-aminobutyric acid receptor subunit alpha-1	TCMSP
723	MOL000449	Stigmasterol	AR	P10275	androgen receptor	Pubchem/TCMSP/Swiss Target
724	MOL000449	Stigmasterol	NPC1L1	Q9UHC9	NPC1-like intracellular cholesterol transporter 1	Swiss Target
725	MOL000449	Stigmasterol	HMGCR	P00347	3-hydroxy-3-methylglutaryl-coenzyme A reductase	Swiss Target
726	MOL000449	Stigmasterol	CYP51A1	Q16850	Lanosterol 14-alpha demethylase	Swiss Target
727	MOL000449	Stigmasterol	CYP19A1	P11511	cytochrome P450 family 19 subfamily A member 1	Pubchem/Swiss Target
728	MOL000449	Stigmasterol	NR1H3	Q13133	Oxysterols receptor LXR-alpha	Swiss Target
729	MOL000449	Stigmasterol	CYP17A1	P05093	Steroid 17-alpha-hydroxylase/17	Swiss Target
730	MOL000449	Stigmasterol	RORC	P51449	Nuclear receptor ROR-gamma	Swiss Target
731	MOL000449	Stigmasterol	ESR1	P03372	Estrogen receptor	Pubchem/TCMSP/Swiss Target
732	MOL000449	Stigmasterol	ESR2	Q92731	Estrogen receptor beta	Pubchem/TCMSP/Swiss Target
733	MOL000449	Stigmasterol	SHBG	P04278	Sex hormone-binding globulin	Swiss Target
734	MOL000449	Stigmasterol	SREBF2	Q12772	Sterol regulatory element-binding protein 2	Swiss Target
735	MOL000449	Stigmasterol	ACHE	P22303	Acetylcholinesterase	Pubchem/TCMSP/Swiss Target
736	MOL000449	Stigmasterol	CYP2C19	P33261	cytochrome P450 family 2 subfamily C member 19	Pubchem/Swiss Target
737	MOL000449	Stigmasterol	PTPN1	P18031	protein tyrosine phosphatase non-receptor type 1	Pubchem/Swiss Target
738	MOL000449	Stigmasterol	BCHE	P06276	Butyrylcholinesterase	Pubchem/Swiss Target
739	MOL000449	Stigmasterol	RORA	P35398	Nuclear receptor ROR-alpha	Swiss Target
740	MOL000449	Stigmasterol	SERPINA6	P08185	Corticosteroid-binding globulin	Swiss Target
741	MOL000449	Stigmasterol	SLC6A4	P31645	Sodium-dependent serotonin transporter	Swiss Target
742	MOL000449	Stigmasterol	G6PD	P11413	Glucose-6-phosphate 1-dehydrogenase	Swiss Target
743	MOL000449	Stigmasterol	VDR	P11473	Vitamin D3 receptor	Swiss Target
744	MOL000449	Stigmasterol	NR1H2	P55055	Oxysterols receptor LXR-beta	Swiss Target
745	MOL000449	Stigmasterol	HSD11B1	P28845	Corticosteroid 11-beta-dehydrogenase isozyme 1	Swiss Target
746	MOL000449	Stigmasterol	PTGER1	P34995	Prostaglandin E2 receptor EP1 subtype	Swiss Target
747	MOL000449	Stigmasterol	PTGER2	P43116	Prostaglandin E2 receptor EP2 subtype	Swiss Target
748	MOL000449	Stigmasterol	CDC25A	P30304	M-phase inducer phosphatase 1	Swiss Target
749	MOL000449	Stigmasterol	GLRA1	P23415	Glycine receptor subunit alpha-1	Swiss Target
750	MOL000449	Stigmasterol	CES2	O00748	Cocaine esterase	Swiss Target
751	MOL000449	Stigmasterol	PTGES	O14684	Prostaglandin E synthase	Swiss Target
752	MOL000449	Stigmasterol	PPARA	Q07869	Peroxisome proliferator-activated receptor alpha	TCMSP/Swiss Target
753	MOL000449	Stigmasterol	PPARD	Q03181	Peroxisome proliferator-activated receptor delta	TCMSP/Swiss Target
754	MOL000449	Stigmasterol	SQLE	Q14534	Squalene monooxygenase	Swiss Target
755	MOL000449	Stigmasterol	DHCR7	Q9UBM7	7-dehydrocholesterol reductase	Swiss Target
756	MOL000449	Stigmasterol	NR1I3	Q14994	Nuclear receptor subfamily 1 group I member 3	Pubchem/TCMSP/Swiss Target
757	MOL000449	Stigmasterol	PTPN6	P29350	Tyrosine-protein phosphatase non-receptor type 6	Swiss Target
758	MOL000449	Stigmasterol	NR3C1	P04150	nuclear receptor subfamily 3 group C member 1	Pubchem/Swiss Target
759	MOL000449	Stigmasterol	CDC25B	P30305	M-phase inducer phosphatase 2	Swiss Target
760	MOL000449	Stigmasterol	NOS2	P35228	Nitric oxide synthase, inducible	TCMSP
761	MOL000449	Stigmasterol	HSD11B2	P80365	Corticosteroid 11-beta-dehydrogenase isozyme 2	Swiss Target
762	MOL000449	Stigmasterol	TBXAS1	P24557	Thromboxane-A synthase	Swiss Target
763	MOL000449	Stigmasterol	PPARG	P37231	Peroxisome proliferator activated receptor gamma	Pubchem/TCMSP/Swiss Target
764	MOL000449	Stigmasterol	UGT2B7	P16662	UDP-glucuronosyltransferase 2B7	Swiss Target
765	MOL005983	Leucodelphinidin	PTGS2	P35354	Prostaglandin G/H synthase 2	Pubchem/TCMSP/Swiss Target
766	MOL005983	Leucodelphinidin	CA2	P00918	Carbonic anhydrase II	Swiss Target
767	MOL005983	Leucodelphinidin	CA12	O43570	Carbonic anhydrase XII	Swiss Target
768	MOL005983	Leucodelphinidin	CA9	Q16790	Carbonic anhydrase IX	Swiss Target
769	MOL005983	Leucodelphinidin	CA7	P43166	Carbonic anhydrase VII	Swiss Target
770	MOL005983	Leucodelphinidin	CA4	P22748	Carbonic anhydrase IV	Swiss Target
771	MOL005983	Leucodelphinidin	CA1	P00915	Carbonic anhydrase I	Swiss Target
772	MOL005983	Leucodelphinidin	BACE1	P56817	Beta-secretase 1	Swiss Target
773	MOL005983	Leucodelphinidin	ABCB1	P08183	P-glycoprotein 1	Swiss Target
774	MOL005983	Leucodelphinidin	MMP2	P08253	Matrix metalloproteinase 2	Swiss Target
775	MOL005983	Leucodelphinidin	PTGS1	P23219	Cyclooxygenase-1	Swiss Target
776	MOL005983	Leucodelphinidin	KIT	P10721	Stem cell growth factor receptor	Swiss Target
777	MOL005983	Leucodelphinidin	SRC	P12931	Tyrosine-protein kinase SRC	Swiss Target
778	MOL005983	Leucodelphinidin	KDR	P35968	Vascular endothelial growth factor receptor 2	Swiss Target
779	MOL005983	Leucodelphinidin	FGFR1	P11362	Fibroblast growth factor receptor 1	Swiss Target
780	MOL005983	Leucodelphinidin	MET	P08581	Hepatocyte growth factor receptor	Swiss Target
781	MOL005983	Leucodelphinidin	CA3	P07451	Carbonic anhydrase III	Swiss Target
782	MOL005983	Leucodelphinidin	CA6	P23280	Carbonic anhydrase VI	Swiss Target
783	MOL005983	Leucodelphinidin	CA5B	Q9Y2D0	Carbonic anhydrase VB	Swiss Target
784	MOL005983	Leucodelphinidin	CA5A	P35218	Carbonic anhydrase VA	Swiss Target
785	MOL005983	Leucodelphinidin	MMP13	P45452	Matrix metalloproteinase 13	Swiss Target
786	MOL005983	Leucodelphinidin	MMP12	P39900	Matrix metalloproteinase 12	Swiss Target
787	MOL005983	Leucodelphinidin	PGF	P49763	Placenta growth factor	Swiss Target
788	MOL005983	Leucodelphinidin	VEGFA	P15692	Vascular endothelial growth factor A	Swiss Target
789	MOL005983	Leucodelphinidin	MMP9	P14780	Matrix metalloproteinase 9	Swiss Target
790	MOL005983	Leucodelphinidin	BCL2	P10415	Apoptosis regulator Bcl-2	Swiss Target
791	MOL005983	Leucodelphinidin	MAPT	P10636	Microtubule-associated protein tau	Swiss Target
792	MOL005983	Leucodelphinidin	DNMT1	P26358	DNA (cytosine-5)-methyltransferase 1	Swiss Target
793	MOL005983	Leucodelphinidin	DYRK1A	Q13627	Dual-specificity tyrosine-phosphorylation regulated kinase 1A	Swiss Target
794	MOL005983	Leucodelphinidin	KCNH2	Q12809	HERG	Swiss Target
795	MOL005983	Leucodelphinidin	APP	P05067	Beta amyloid A4 protein	Swiss Target
796	MOL005983	Leucodelphinidin	MAPK14	Q16539	MAP kinase p38 alpha	Swiss Target
797	MOL005983	Leucodelphinidin	TERT	O14746	Telomerase reverse transcriptase	Swiss Target
798	MOL005983	Leucodelphinidin	PGD	P52209	6-phosphogluconate dehydrogenase	Swiss Target
799	MOL005983	Leucodelphinidin	ST3GAL3	Q11203	CMP-N-acetylneuraminate-beta-1,4-galactoside alpha-2,3-sialyltransferase	Swiss Target
800	MOL005983	Leucodelphinidin	FUT7	Q11130	Alpha-(1,3)-fucosyltransferase 7	Swiss Target
801	MOL005983	Leucodelphinidin	FUT4	P22083	Fucosyltransferase 4	Swiss Target
802	MOL005983	Leucodelphinidin	STAT1	P42224	Signal transducer and activator of transcription 1-alpha/beta	Swiss Target
803	MOL005983	Leucodelphinidin	SQLE	Q14534	Squalene monooxygenase (by homology)	Swiss Target
804	MOL005983	Leucodelphinidin	GABRA1 GABRB2 GABRG2	P14867 P47870 P18507	GABA-A receptor; alpha-1/beta-2/gamma-2	Swiss Target
805	MOL005983	Leucodelphinidin	CA13	Q8N1Q1	Carbonic anhydrase XIII	Swiss Target
806	MOL005983	Leucodelphinidin	HIF1A	Q16665	Hypoxia-inducible factor 1 alpha	Swiss Target
807	MOL005983	Leucodelphinidin	ALOX15	P16050	Arachidonate 15-lipoxygenase	Swiss Target
808	MOL005983	Leucodelphinidin	ALOX12	P18054	Arachidonate 12-lipoxygenase	Swiss Target
809	MOL005983	Leucodelphinidin	CYP1B1	Q16678	Cytochrome P450 1B1	Swiss Target
810	MOL005983	Leucodelphinidin	KLK1	P06870	Kallikrein 1	Swiss Target
811	MOL005983	Leucodelphinidin	KLK2	P20151	Kallikrein 2	Swiss Target
812	MOL010788	Leucopelargonidin	PTGS1	P23219	Prostaglandin G/H synthase 1	TCMSP
813	MOL010788	Leucopelargonidin	ESR1	P03372	Estrogen receptor	TCMSP
814	MOL010788	Leucopelargonidin	PTGS2	P35354	Prostaglandin G/H synthase 2	TCMSP
815	MOL004425	Icariin	PDE5A	O76074	Phosphodiesterase 5A	Pubchem/Swiss Target
816	MOL004425	Icariin	AKR1B1	P15121	Aldose reductase	Swiss Target
817	MOL004425	Icariin	CA4	P22748	Carbonic anhydrase IV	Swiss Target
818	MOL004425	Icariin	CA7	P43166	Carbonic anhydrase VII	Swiss Target
819	MOL004425	Icariin	CA12	O43570	Carbonic anhydrase XII	Swiss Target
820	MOL004425	Icariin	NQO2	P16083	Quinone reductase 2	Swiss Target
821	MOL004425	Icariin	ACHE	P22303	Acetylcholinesterase	Swiss Target
822	MOL004425	Icariin	ADORA1	P30542	Adenosine A1 receptor (by homology)	Swiss Target
823	MOL004425	Icariin	ADRA2C	P18825	Adrenergic receptor alpha-2	Swiss Target
824	MOL004425	Icariin	ADRA2A	P08913	Alpha-2a adrenergic receptor	Swiss Target
825	MOL004425	Icariin	CA2	P00918	Carbonic anhydrase II	Swiss Target
826	MOL004425	Icariin	PTGS2	P35354	Cyclooxygenase-2	Swiss Target
827	MOL004425	Icariin	IL2	P60568	Interleukin-2	Swiss Target
828	MOL004425	Icariin	CD38	P28907	Lymphocyte differentiation antigen CD38	Swiss Target
829	MOL004425	Icariin	NOX4	Q9NPH5	NADPH oxidase 4	Swiss Target
830	MOL004425	Icariin	NMUR2	Q9GZQ4	Neuromedin-U receptor 2	Swiss Target
831	MOL004425	Icariin	RPS6KA3	P51812	Ribosomal protein S6 kinase alpha 3	Swiss Target
832	MOL004425	Icariin	SQLE	Q14534	Squalene monooxygenase (by homology)	Swiss Target
833	MOL004425	Icariin	TNF	P01375	TNF-alpha	Swiss Target
834	MOL004425	Icariin	KDM1A	O60341	lysine demethylase 1A	Pubchem
835	MOL004425	Icariin	GPR151	Q8TDV0	G protein-coupled receptor 151	Pubchem

## Sheet: Table S2
Table S2 Target genes attached to Quercetin, Kaempferol and Isorhamnetin.
Number	Gene name	Uniprot ID	Protein name	Database
1	ABCB1	P08183	ATP binding cassette subfamily B member 1	Pubchem/Swiss Target
2	ABCC1	P33527	ATP binding cassette subfamily C member 1	Pubchem/Swiss Target
3	ABCC4	O15439	ATP binding cassette subfamily C member 4	Pubchem
4	ABCG2	Q9UNQ0	ATP binding cassette subfamily G member 2	Pubchem/TCMSP/Swiss Target
5	ACACA	Q13085	Acetyl-CoA carboxylase 1	TCMSP
6	ACHE	P22303	acetylcholinesterase	Pubchem/TCMSP/Swiss Target
7	ACPP	P15309	Prostatic acid phosphatase	TCMSP
8	ADAM10	O14672	ADAM metallopeptidase domain 10	Pubchem
9	ADAM17	P78536	ADAM metallopeptidase domain 17	Pubchem
10	ADORA1	P30542	Adenosine A1 receptor	Swiss Target
11	ADORA2A	P29274	Adenosine A2a receptor	Swiss Target
12	ADORA3	P0DMS8	adenosine A3 receptor	Pubchem
13	ADRA1B	P35368	Alpha-1B adrenergic receptor	TCMSP
14	ADRB2	P07550	Beta-2 adrenergic receptor	TCMSP
15	AHR	P35869	aryl hydrocarbon receptor	Pubchem/TCMSP/Swiss Target
16	AHSA1	O95433	Activator of 90 kDa heat shock protein ATPase homolog 1	TCMSP
17	AKR1A1	P14550	Aldehyde reductase	Swiss Target
18	AKR1B1	P15121	aldo-keto reductase family 1 member B	Pubchem/TCMSP/Swiss Target
19	AKR1B10	O60218	aldo-keto reductase family 1 member B10	Pubchem/Swiss Target
20	AKR1C1	Q04828	Aldo-keto reductase family 1 member C1	Swiss Target
21	AKR1C2	P52895	Aldo-keto reductase family 1 member C2	Swiss Target
22	AKR1C3	P42330	Aldo-keto-reductase family 1 member C3	TCMSP/Swiss Target
23	AKR1C4	P17516	Aldo-keto reductase family 1 member C4	Swiss Target
24	AKT1	P31749	AKT serine/threonine kinase 1	Pubchem/TCMSP/Swiss Target
25	ALDH1A1	P00352	aldehyde dehydrogenase 1 family member A1	Pubchem
26	ALK	Q9UM73	ALK receptor tyrosine kinase	Pubchem/Swiss Target
27	ALOX12	P18054	arachidonate 12-lipoxygenase, 12S type	Pubchem/Swiss Target
28	ALOX15	P12530	arachidonate 15-lipoxygenase	Pubchem/Swiss Target
29	ALOX15B	O15296	arachidonate 15-lipoxygenase type B	Pubchem
30	ALOX5	P12527	arachidonate 5-lipoxygenase	Pubchem/TCMSP/Swiss Target
31	AMY1A	P04745	amylase alpha 1A	Pubchem/Swiss Target
32	AMY1B	P04745	amylase alpha 1B	Pubchem
33	AMY1C	P04745	amylase alpha 1C	Pubchem
34	APEX1	P27695	DNA-(apurinic or apyrimidinic site) lyase	Swiss Target
35	APP	P05067	amyloid beta precursor protein	Pubchem/Swiss Target
36	AR	P10275	androgen receptor	Pubchem/TCMSP/Swiss Target
37	ARG1	P05089	Arginase-1	Swiss Target
38	ATAD5	Q96QE3	ATPase family AAA domain containing 5	Pubchem
39	AURKB	Q96GD4	aurora kinase B	Pubchem/Swiss Target
40	AVPR2	P30518	arginine vasopressin receptor 2	Pubchem
41	AXL	P30530	AXL receptor tyrosine kinase	Pubchem
42	BACE1	P56817	beta-secretase 1	Pubchem/Swiss Target
43	BAX	Q07812	Apoptosis regulator BAX	TCMSP
44	BCHE	P06276	Butyrylcholinesterase	Pubchem/Swiss Target
45	BCL2	Q92934	Apoptosis regulator Bcl-2	TCMSP
46	BCL2L1	Q07817	Bcl-2-like protein 1	TCMSP
47	BIRC5	O15392	Baculoviral IAP repeat-containing protein 5	TCMSP
48	BLM	P54132	BLM RecQ like helicase	Pubchem
49	BRAF	P15056	B-Raf proto-oncogene, serine/threonine kinase	Pubchem
50	CA1	P00915	carbonic anhydrase 1	Pubchem/Swiss Target
51	CA12	O43570	carbonic anhydrase 12	Pubchem/Swiss Target
52	CA13	Q8N1Q1	Carbonic anhydrase XIII	Swiss Target
53	CA14	Q9ULX7	carbonic anhydrase 14	Pubchem/Swiss Target
54	CA2	P00918	carbonic anhydrase 2	pubchem
55	CA3	P07451	carbonic anhydrase 3	Pubchem/Swiss Target
56	CA4	P22748	carbonic anhydrase 4	Pubchem/Swiss Target
57	CA5A	P35218	carbonic anhydrase 5A	Pubchem/Swiss Target
58	CA5B	Q9Y2D0	carbonic anhydrase 5B	pubchem
59	CA6	P23280	carbonic anhydrase 6	Pubchem/Swiss Target
60	CA7	P43166	carbonic anhydrase 7	Pubchem/Swiss Target
61	CA9	Q16790	carbonic anhydrase 9	Pubchem/Swiss Target
62	CALM1	P0DP23	calmodulin 1	Pubchem
63	CAMK2B	Q13554	calcium/calmodulin dependent protein kinase II beta	Pubchem
64	CASP3	P42574	Caspase-3	TCMSP
65	CASP8	Q14790	Caspase-8	TCMSP
66	CASP9	P55211	Caspase-9	TCMSP
67	CAV1	Q03135	Caveolin-1	TCMSP
68	CCL2	P13500	C-C motif chemokine 2	TCMSP
69	CCNA2	P20248	Cyclin-A2	TCMSP
70	CCNB1	P14635	cyclin B1	Pubchem/TCMSP/Swiss Target
71	CCNB2	O95067	cyclin B2	Pubchem/Swiss Target
72	CCNB3	Q8WWL7	cyclin B3	Pubchem/Swiss Target
73	CCND1	P24385	G1/S-specific cyclin-D1	TCMSP
74	CCR4	P51679	C-C motif chemokine receptor 4	Pubchem
75	CD38	P28907	CD38 molecule	Pubchem/Swiss Target
76	CD40LG	P29965	CD40 ligand	TCMSP
77	CDK1	P06493	Cyclin-dependent kinase 1	Pubchem/Swiss Target
78	CDK12	Q9NYV4	Cyclin-dependent kinase 12	Pubchem/Swiss Target
79	CDK2	P24941	cyclin dependent kinase 2	Pubchem/Swiss Target
80	CDK5	Q00535	cyclin dependent kinase 5	Pubchem/Swiss Target
81	CDK5R1	Q15078	cyclin dependent kinase 5 regulatory subunit 1	Pubchem/Swiss Target
82	CDK6	Q00534	cyclin dependent kinase 6	Pubchem/Swiss Target
83	CDKN1A	P38936	Cyclin-dependent kinase inhibitor 1	TCMSP
84	CFTR	P13569	Cystic fibrosis transmembrane conductance regulator	Swiss Target
85	CHEK1	O14757	Serine/threonine-protein kinase Chk1	TCMSP
86	CHEK2	O96017	Serine/threonine-protein kinase Chk2	TCMSP
87	CHRM1	P11229	cholinergic receptor muscarinic 1	Pubchem/TCMSP
88	CHRM2	P08172	Muscarinic acetylcholine receptor M2	Pubchem/TCMSP/Swiss Target
89	CHUK	O15111	Inhibitor of nuclear factor kappa-B kinase subunit alpha	TCMSP
90	CISD1	Q9NZ45	CDGSH iron sulfur domain 1	Pubchem
91	CLDN4	O14493	Claudin-4	TCMSP
92	CLK1	P49759	CDC like kinase 1	Pubchem
93	CLK3	P49761	CDC like kinase 3	Pubchem
94	COL1A1	P02452	Collagen alpha-1(I) chain	TCMSP
95	COL3A1	P02461	Collagen alpha-1(III) chain	TCMSP
96	CRP	P02741	C-reactive protein	TCMSP
97	CSNK1G1	Q9HCP0	casein kinase 1 gamma 1	Pubchem
98	CSNK1G2	P78368	casein kinase 1 gamma 2	Pubchem
99	CSNK2A1	P68400	casein kinase 2 alpha 1	Pubchem/Swiss Target
100	CSNK2A2	P19784	casein kinase 2 alpha 2	Pubchem
101	CSNK2B	P67870	casein kinase 2 beta	Pubchem
102	CTDSP1	Q9GZU7	CTD small phosphatase 1	Pubchem
103	CTSD	P07339	Cathepsin D	TCMSP
104	CXCL10	P02778	C-X-C motif chemokine 10	TCMSP
105	CXCL11	O14625	C-X-C motif chemokine 11	TCMSP
106	CXCL2	P19875	C-X-C motif chemokine 2	TCMSP
107	CXCL8	P10145	Interleukin-8	TCMSP
108	CXCR1	P25024	C-X-C motif chemokine receptor 1	Pubchem/Swiss Target
109	CYP19A1	P11511	cytochrome P450 family 19 subfamily A member 1	Pubchem/Swiss Target
110	CYP1A1	P04798	cytochrome P450 family 1 subfamily A member 1	Pubchem/TCMSP
111	CYP1A2	P05177	cytochrome P450 family 1 subfamily A member 2	Pubchem/TCMSP
112	CYP1B1	Q16678	cytochrome P450 family 1 subfamily B member 1	Pubchem/TCMSP/Swiss Target
113	CYP2C19	P33261	cytochrome P450 family 2 subfamily C member 19	Pubchem/Swiss Target
114	CYP2C8	P10632	cytochrome P450 family 2 subfamily C member 8	Pubchem
115	CYP2C9	P11712	cytochrome P450 family 2 subfamily C member 9	Pubchem
116	CYP2D6	P10635	cytochrome P450 family 2 subfamily D member 6	Pubchem
117	CYP3A4	P08684	cytochrome P450 family 3 subfamily A member 4	Pubchem/TCMSP
118	DAPK1	P53355	death associated protein kinase 1	Pubchem/Swiss Target
119	DCAF5	Q96JK2	DDB1- and CUL4-associated factor 5	TCMSP
120	DIO1	P49895	Type I iodothyronine deiodinase	TCMSP
121	DIRAS1	O95057	DIRAS family GTPase 1	Pubchem
122	DPP4	P27487	dipeptidyl peptidase 4	Pubchem
123	DRD1	P21728	dopamine receptor D1	Pubchem
124	DUOX2	Q9NRD8	Dual oxidase 2	TCMSP
125	E2F1	Q01094	Transcription factor E2F1	TCMSP
126	E2F2	Q14209	Transcription factor E2F2	TCMSP
127	EGF	P01133	Pro-epidermal growth factor	Pubchem/TCMSP/Swiss Target
128	EGFR	P35968	epidermal growth factor receptor	Pubchem/TCMSP/Swiss Target
129	EIF6	P56537	Eukaryotic translation initiation factor 6	TCMSP
130	ELANE	P08246	elastase, neutrophil expressed	Pubchem
131	ELAVL1	Q15717	ELAV like RNA binding protein 1	Pubchem
132	ELAVL3	Q14576	ELAV like RNA binding protein 3	Pubchem
133	ELK1	P19419	ETS domain-containing protein Elk-1	TCMSP
134	EPHX2	P34913	epoxide hydrolase 2	Pubchem
135	ERBB2	P04626	Receptor tyrosine-protein kinase erbB-2	TCMSP
136	ERBB3	P21860	Receptor tyrosine-protein kinase erbB-3	TCMSP
137	ESR1	P03372	Estrogen receptor	Pubchem/TCMSP/Swiss Target
138	ESR2	Q92731	Estrogen receptor beta	Pubchem/TCMSP/Swiss Target
139	ESRRA	P11474	estrogen related receptor alpha	Pubchem/Swiss Target
140	EZH2	Q15910	enhancer of zeste 2 polycomb repressive complex 2 subunit	Pubchem
141	F2	P00734	coagulation factor II, thrombin	Pubchem/Swiss Target
142	F3	P13726	Tissue factor	TCMSP
143	F7	P08709	Coagulation factor VII	TCMSP
144	FEN1	P39748	flap structure-specific endonuclease 1	Pubchem
145	FLT3	P36888	fms related tyrosine kinase 3	Pubchem
146	FOS	P01100	Proto-oncogene c-Fos	TCMSP
147	GAA	P10253	glucosidase alpha, acid	Pubchem
148	GABRA1	P14867	Gamma-aminobutyric acid receptor subunit alpha-1	TCMSP
149	GALK1	P51570	galactokinase 1	Pubchem
150	GCK	P35557	glucokinase	Pubchem
151	GJA1	P17302	Gap junction alpha-1 protein	TCMSP
152	GLI3	AAI13617	GLI family zinc finger 3	Pubchem
153	GLO1	Q04760	glyoxalase I	Pubchem/Swiss Target
154	GPR35	Q9HC97	G protein-coupled receptor 35	Pubchem/Swiss Target
155	GRIA2	P42262	Glutamate receptor 2	TCMSP
156	GRK6	P43250	G protein-coupled receptor kinase 6	Swiss Target
157	GSK3A	P49840	glycogen synthase kinase 3 alpha	Pubchem
158	GSK3B	P49841	glycogen synthase kinase 3 beta	Pubchem/TCMSP/Swiss Target
159	GSTM1	P09488	Glutathione S-transferase Mu 1	TCMSP
160	GSTM2	P28161	Glutathione S-transferase Mu 2	TCMSP
161	GSTP1	P09211	Glutathione S-transferase P	TCMSP
162	HAS2	Q92819	Hyaluronan synthase 2	TCMSP
163	HDAC9	Q9UKV0	histone deacetylase 9	Pubchem
164	HIF1A	Q16665	hypoxia inducible factor 1 subunit alpha	Pubchem
165	HIF1AN	Q9NWT6	hypoxia inducible factor 1 subunit alpha inhibitor	Pubchem
166	HK2	P52789	Hexokinase-2	TCMSP
167	HMOX1	P09601	Heme oxygenase 1	TCMSP
168	HPGD	P15428	15-hydroxyprostaglandin dehydrogenase	Pubchem
169	HSD17B1	P14061	Estradiol 17-beta-dehydrogenase 1	Pubchem/Swiss Target
170	HSD17B2	P37059	hydroxysteroid 17-beta dehydrogenase 2	Pubchem/Swiss Target
171	HSF1	Q00613	heat shock transcription factor 1	Pubchem/TCMSP
172	HSP90AA1	P07900	heat shock protein 90 alpha family class A member 1	Pubchem
173	HSP90AB1	P08238	heat shock protein 90 alpha family class B member 1	Pubchem
174	HSPB1	P04792	heat shock protein family B (small) member 1	Pubchem/TCMSP
175	ICAM1	P05362	Intercellular adhesion molecule 1	TCMSP
176	IFNG	P01579	interferon gamma	Pubchem
177	IGF1R	P08069	insulin like growth factor 1 receptor	Pubchem/Swiss Target
178	IGF2	P01344	Insulin-like growth factor II	TCMSP
179	IGFBP3	P17936	Insulin-like growth factor-binding protein 3	TCMSP
180	IKBKB	O14920	Inhibitor of nuclear factor kappa-B kinase subunit beta	TCMSP
181	IL10	P22301	Interleukin-10	TCMSP
182	IL1A	P01583	Interleukin-1 alpha	TCMSP
183	IL1B	P01584	Interleukin-1 beta	TCMSP
184	IL2	P60568	Interleukin-2	TCMSP
185	IL6	P08887	Interleukin-6	TCMSP
186	INSR	P06213	Insulin receptor	Pubchem/TCMSP/Swiss Target
187	IRF1	P10914	Interferon regulatory factor 1	TCMSP
188	JUN	P05412	Transcription factor AP-1	TCMSP
189	KCNH2	Q12809	Potassium voltage-gated channel subfamily H member 2	TCMSP
190	KDM4E	B2RXH2	Lysine-specific demethylase 4D-like	Swiss Target
191	KDR	P35968	kinase insert domain receptor	Pubchem
192	LCK	P06239	LCK proto-oncogene, Src family tyrosine kinase	Pubchem
193	MAOA	P21398	monoamine oxidase A	Pubchem
194	MAOB	P56560	monoamine oxidase B	Pubchem/Swiss Target
195	MAP3K5	Q99683	mitogen-activated protein kinase kinase kinase 5	Pubchem
196	MAPK1	P28482	Mitogen-activated protein kinase 1	TCMSP
197	MAPK14	Q16539	Mitogen-activated protein kinase 14	TCMSP
198	MAPK8	P45983	Mitogen-activated protein kinase 8	TCMSP
199	MAPT	P10636	microtubule associated protein tau	Pubchem
200	MCL1	Q07820	Induced myeloid leukemia cell differentiation protein Mcl-1	Swiss Target
201	MET	P08581	MET proto-oncogene, receptor tyrosine kinase	Pubchem
202	MGAM	O43451	maltase-glucoamylase	Pubchem/TCMSP
203	MMP1	P03956	Interstitial collagenase	TCMSP
204	MMP12	P39900	matrix metallopeptidase 12	Pubchem/Swiss Target
205	MMP13	P45452	matrix metallopeptidase 13	Pubchem/Swiss Target
206	MMP2	P08253	matrix metallopeptidase 2	Pubchem/TCMSP/Swiss Target
207	MMP3	P08254	matrix metallopeptidase 3	Pubchem/TCMSP/Swiss Target
208	MMP9	P14780	matrix metallopeptidase 9	Pubchem/TCMSP/Swiss Target
209	MPG	P29372	DNA-3-methyladenine glycosylase	Swiss Target
210	MPHOSPH8	Q99549	M-phase phosphoprotein 8	Pubchem/Swiss Target
211	MPO	P05164	myeloperoxidase	Pubchem/TCMSP/Swiss Target
212	MYC	P01106	Myc proto-oncogene protein	TCMSP
213	MYLK	Q15746	Myosin light chain kinase, smooth muscle	Swiss Target
214	NCF1	P14598	Neutrophil cytosol factor 1	TCMSP
215	NCOA1	Q15788	Nuclear receptor coactivator 1	TCMSP
216	NCOA2	Q15596	Nuclear receptor coactivator 2	TCMSP
217	NEK2	P51955	NIMA related kinase 2	Pubchem/Swiss Target
218	NEK6	Q9HC98	NIMA related kinase 6	Pubchem/Swiss Target
219	NFE2L2	Q16236	Nuclear factor erythroid 2-related factor 2	Pubchem/TCMSP
220	NFKB1	P19838	nuclear factor kappa B subunit 1	Pubchem
221	NFKB2	Q00653	nuclear factor kappa B subunit 2	Pubchem
222	NFKBIA	P25963	NF-kappa-B inhibitor alpha	TCMSP
223	NOS2	P35228	Nitric oxide synthase, inducible	TCMSP
224	NOS3	P29474	Nitric oxide synthase, endothelial	TCMSP
225	NOX4	Q9NPH5	NADPH oxidase 4	Pubchem/Swiss Target
226	NPEPPS	P55786	Puromycin-sensitive aminopeptidase	TCMSP
227	NQO1	P15559	NAD(P)H dehydrogenase [quinone] 1	TCMSP
228	NR1I2	O75469	nuclear receptor subfamily 1 group I member 2	Pubchem
229	NR1I3	Q14994	Nuclear receptor subfamily 1 group I member 3	Pubchem/TCMSP/Swiss Target
230	NR3C1	P04150	nuclear receptor subfamily 3 group C member 1	Pubchem/Swiss Target
231	NUAK1	O60285	NUAK family kinase 1	Pubchem/Swiss Target
232	ODC1	P11926	Ornithine decarboxylase	TCMSP
233	OLR1	P78380	Oxidized low-density lipoprotein receptor 1	TCMSP
234	PAFAH1B3	Q15102	platelet activating factor acetylhydrolase 1b catalytic subunit 3	Pubchem
235	PARP1	P09874	Poly [ADP-ribose] polymerase 1	TCMSP
236	PCOLCE	Q15113	Procollagen C-endopeptidase enhancer 1	TCMSP
237	PFKFB3	Q16875	6-phosphofructo-2-kinase/fructose-2,6-bisphosphatase 3	Swiss Target
238	PGD	P52209	phosphogluconate dehydrogenase	Pubchem
239	PGR	P06401	progesterone receptor	Pubchem/TCMSP
240	PIK3CA	P42336	phosphatidylinositol-4,5-bisphosphate 3-kinase catalytic subunit alpha	Pubchem
241	PIK3CG	P48736	phosphatidylinositol-4,5-bisphosphate 3-kinase catalytic subunit gamma	Pubchem/Swiss Target
242	PIK3R1	P27986	phosphoinositide-3-kinase regulatory subunit 1	Pubchem/Swiss Target
243	PIM1	P11309	Pim-1 proto-oncogene, serine/threonine kinase	Pubchem/Swiss Target
244	PIM2	Q9P1W9	Pim-2 proto-oncogene, serine/threonine kinase	Pubchem
245	PIP4K2A	P48426	phosphatidylinositol-5-phosphate 4-kinase type 2 alpha	Pubchem
246	PKN1	Q16512	protein kinase N1	Pubchem/Swiss Target
247	PLA2G1B	P04054	phospholipase A2 group IB	Pubchem/Swiss Target
248	PLAT	P00750	Tissue-type plasminogen activator	TCMSP
249	PLAU	P00749	plasminogen activator, urokinase	Pubchem/TCMSP
250	PLG	P00747	Plasminogen	Swiss Target
251	PLK1	P53350	polo like kinase 1	Pubchem/Swiss Target
252	POLB	P06746	DNA polymerase beta	Pubchem/Swiss Target
253	POLH	Q9Y253	DNA polymerase eta	Pubchem
254	POLI	Q9UNA4	DNA polymerase iota	Pubchem
255	POLK	Q9UBT6	DNA polymerase kappa	Pubchem
256	PON1	P27169	paraoxonase 1	Pubchem/TCMSP
257	POR	P16435	NADPH--cytochrome P450 reductase	TCMSP
258	PPARA	Q07869	Peroxisome proliferator-activated receptor alpha	TCMSP/Swiss Target
259	PPARD	Q03181	Peroxisome proliferator-activated receptor delta	TCMSP/Swiss Target
260	PPARG	P37231	Peroxisome proliferator activated receptor gamma	Pubchem/TCMSP/Swiss Target
261	PPP3CA	Q08209	Serine/threonine-protein phosphatase 2B catalytic subunit alpha isoform	TCMSP
262	PREP	P48147	prolyl endopeptidase	Pubchem
263	PRKCA	P17252	Protein kinase C alpha type	TCMSP
264	PRKCB	P05771	Protein kinase C beta type	TCMSP
265	PRSS1	P07477	serine protease 1	Pubchem/TCMSP
266	PRSS2	P07478	serine protease 2	Pubchem
267	PRSS3	P35030	serine protease 3	Pubchem
268	PSMD3	O43242	26S proteasome non-ATPase regulatory subunit 3	TCMSP
269	PTGER3	P43115	Prostaglandin E2 receptor EP3 subtype	TCMSP
270	PTGS1	P23219	Prostaglandin G/H synthase 1	TCMSP
271	PTGS2	P35354	Prostaglandin G/H synthase 2	Pubchem/TCMSP/Swiss Target
272	PTK2	Q05397	protein tyrosine kinase 2	Pubchem/Swiss Target
273	PTPN1	P18031	protein tyrosine phosphatase non-receptor type 1	Pubchem/Swiss Target
274	PTPRS	Q13332	Receptor-type tyrosine-protein phosphatase S	Swiss Target
275	PYGL	P06737	glycogen phosphorylase L	Pubchem/Swiss Target
276	PYGM	P11217	Glycogen phosphorylase, muscle form	TCMSP
277	RACGAP1	Q9H0H5	Rac GTPase activating protein 1	Pubchem
278	RAF1	P04049	RAF proto-oncogene serine/threonine-protein kinase	TCMSP
279	RARA	P10276	retinoic acid receptor alpha	Pubchem
280	RASA1	P20936	Ras GTPase-activating protein 1	TCMSP
281	RASSF1	Q9NS23	Ras association domain-containing protein 1	TCMSP
282	RB1	P06400	Retinoblastoma-associated protein	TCMSP
283	RELA	Q04206	RELA proto-oncogene, NF-kB subunit	Pubchem/TCMSP
284	RNASEH1	O60930	ribonuclease H1	Pubchem
285	RUNX1T1	Q06455	Protein CBFA2T1	TCMSP
286	RUNX2	Q13950	Runt-related transcription factor 2	TCMSP
287	RXRA	P19793	retinoid X receptor alpha	Pubchem/TCMSP
288	SCN5A	Q14524	Sodium channel protein type 5 subunit alpha	TCMSP
289	SELE	P16581	E-selectin	TCMSP
290	SERPINE1	P05121	Plasminogen activator inhibitor 1	TCMSP
291	SI	P14410	sucrase-isomaltase	Pubchem
292	SIAE	Q9HAT2	sialic acid acetylesterase	Pubchem
293	SLC22A12	Q96S37	Solute carrier family 22 member 12	Swiss Target
294	SLC2A1	P11166	solute carrier family 2 member 1	Pubchem
295	SLC2A2	P11168	solute carrier family 2 member 2	Pubchem
296	SLC2A4	Q9NR83	Solute carrier family 2, facilitated glucose transporter member 4	TCMSP
297	SLC6A2	P23975	Norepinephrine transporter	TCMSP/Swiss Target
298	SLK	Q9H2G2	STE20 like kinase	Pubchem
299	SLPI	P03973	Antileukoproteinase	TCMSP
300	SMAD2	Q15796	SMAD family member 2	Pubchem
301	SMAD3	P84022	SMAD family member 3	Pubchem
302	SOD1	P00441	Superoxide dismutase [Cu-Zn]	TCMSP
303	SORD	Q00796	sorbitol dehydrogenase	Pubchem
304	SPP1	P10451	Osteopontin	TCMSP
305	SRC	P12931	SRC proto-oncogene, non-receptor tyrosine kinase	Swiss Target
306	STAT1	P42224	Signal transducer and activator of transcription 1-alpha/beta	TCMSP
307	STK16	O75716	serine/threonine kinase 16	Pubchem
308	SULT1E1	P49888	Estrogen sulfotransferase	TCMSP
309	SYK	P43405	spleen associated tyrosine kinase	Pubchem/TCMSP
310	TDP1	Q9NUW8	tyrosyl-DNA phosphodiesterase 1	Pubchem
311	TERT	O14746	Telomerase reverse transcriptase	Swiss Target
312	THBD	P07204	Thrombomodulin	TCMSP
313	TNFSF15	O95150	Tumor necrosis factor	TCMSP
314	TNKS	O95271	Tankyrase-1	Swiss Target
315	TNKS2	Q9H2K2	Tankyrase-2	Swiss Target
316	TOP1	P11387	DNA topoisomerase I	Pubchem/TCMSP/Swiss Target
317	TOP2A	P11388	DNA topoisomerase 2-alpha	Pubchem/TCMSP/Swiss Target
318	TP53	P04637	tumor protein p53	Pubchem
319	TP63	Q9H3D4	Cellular tumor antigen p53	TCMSP
320	TTR	P02766	Transthyretin	Swiss Target
321	TYR	P14679	Tyrosinase	Pubchem/Swiss Target
322	VCAM1	P19320	Vascular cell adhesion protein 1	TCMSP
323	VEGFA	P15692	Vascular endothelial growth factor A	TCMSP
324	XDH	P47989	xanthine dehydrogenase	Pubchem/Swiss Target
325	YES1	P07947	YES proto-oncogene 1, Src family tyrosine kinase	Pubchem
326	YWHAB	P31946	tyrosine 3-monooxygenase/tryptophan 5-monooxygenase activation protein beta	Pubchem
327	AIFM1	O95831	Apoptosis-inducing Factor 1, Mitochondrial	SymMap
328	AK1	P00568	Adenylate Kinase Isoenzyme 1	SymMap

## Sheet: Table S3
Table S3 GSE12288 database
P.Value	logFC	Gene.symbol	Gene.title
1.99e-05	0.24609	PTPN4	protein tyrosine phosphatase, non-receptor type 4
2.02e-05	-0.672974	L3MBTL1	l(3)mbt-like 1 (Drosophila)
3.7e-05	-0.443827	NCAPH	non-SMC condensin I complex subunit H
4.82e-05	-0.518237	TP53I11	tumor protein p53 inducible protein 11
7.95e-05	0.282718	MPZL1	myelin protein zero like 1
8.66e-05	-0.506698	ACSM3	acyl-CoA synthetase medium-chain family member 3
0.0001211	0.54565	KIZ	kizuna centrosomal protein
0.0001287	-0.25961	SEMA3C	semaphorin 3C
0.0001376	-0.217093	CEBPA	CCAAT/enhancer binding protein alpha
0.0001465	-0.525163	CA12	carbonic anhydrase 12
0.0001563	0.187093	RABGAP1L	RAB GTPase activating protein 1 like
0.0002017	0.171996	ZMYND11	zinc finger MYND-type containing 11
0.0002949	-0.63107	IQCK	IQ motif containing K
0.0003088	-0.521771	AP4E1	adaptor related protein complex 4 epsilon 1 subunit
0.0003367	-0.472896	HOXA10	homeobox A10
0.0003448	0.354727	BCLAF1	BCL2 associated transcription factor 1
0.0003626	0.157582	SUZ12	SUZ12 polycomb repressive complex 2 subunit
0.000363	0.531378	ZNF639	zinc finger protein 639
0.0006344	-0.61588	BTNL8	butyrophilin like 8
0.0006653	-0.477171	AZGP1P1	alpha-2-glycoprotein 1, zinc-binding pseudogene 1
0.0006702	0.302298	API5	apoptosis inhibitor 5
0.0007587	-0.417616	AVL9	AVL9 cell migration associated
0.0008092	0.213357	IL27RA	interleukin 27 receptor subunit alpha
0.0008196	-0.136751	ITPK1	inositol-tetrakisphosphate 1-kinase
0.0008634	0.135437	TES	testin LIM domain protein
0.0008939	0.221295	NAA50	N(alpha)-acetyltransferase 50, NatE catalytic subunit
0.0008988	0.158687	TBL1X	transducin (beta)-like 1X-linked
0.0009114	-0.643647	TMEM158	transmembrane protein 158 (gene/pseudogene)
0.0009334	0.426904	APBA2	amyloid beta precursor protein binding family A member 2
0.0009862	0.459729	MAPKBP1	mitogen-activated protein kinase binding protein 1
0.001101	-0.294802	MIR631	microRNA 631
0.001101	-0.294802	NEIL1	nei like DNA glycosylase 1
0.0011745	0.355426	PKIA	protein kinase (cAMP-dependent, catalytic) inhibitor alpha
0.0011914	0.154168	HADHA	hydroxyacyl-CoA dehydrogenase/3-ketoacyl-CoA thiolase/enoyl-CoA hydratase (trifunctional protein), alpha subunit
0.0012416	0.119956	UBE2G1	ubiquitin conjugating enzyme E2 G1
0.0012636	0.184925	HIF1A	hypoxia inducible factor 1 alpha subunit
0.0012682	0.554376	AKR1C3	aldo-keto reductase family 1, member C3
0.0012978	0.308353	SMYD5	SMYD family member 5
0.0013032	0.367042	RIC8B	RIC8 guanine nucleotide exchange factor B
0.0013301	-0.546775	DSC2	desmocollin 2
0.0013819	-0.431059	IGLV1-44	immunoglobulin lambda variable 1-44
0.0013836	0.104281	CCDC28A	coiled-coil domain containing 28A
0.0014038	0.392214	ASUN	asunder, spermatogenesis regulator
0.0014126	0.161459	ARL4C	ADP ribosylation factor like GTPase 4C
0.001415	-0.126941	TUBA1B	tubulin alpha 1b
0.0015757	0.163545	LRRC47	leucine rich repeat containing 47
0.0016028	0.436412	NEFH	neurofilament heavy polypeptide
0.0016288	0.187385	TMED10	transmembrane p24 trafficking protein 10
0.0016408	-0.425854	GPR15	G protein-coupled receptor 15
0.0016758	-0.479737	CDC42	cell division cycle 42
0.0016777	-0.54828	TBX1	T-box 1
0.0017142	-0.371742	MS4A4A	membrane spanning 4-domains A4A
0.0017555	-0.13519	LMF2	lipase maturation factor 2
0.0017779	0.347357	SCRIB	scribbled planar cell polarity protein
0.0018065	-0.287683	NFX1	nuclear transcription factor, X-box binding 1
0.0018122	0.122125	CHMP7	charged multivesicular body protein 7
0.0018306	0.459378	ZNF83	zinc finger protein 83
0.0018333	0.146754	CD6	CD6 molecule
0.0018489	-0.433292	DBF4B	DBF4 zinc finger B
0.0018799	0.273531	ATMIN	ATM interactor
0.0018802	-0.108936	AGPAT1	1-acylglycerol-3-phosphate O-acyltransferase 1
0.0018898	0.468536	PAM	peptidylglycine alpha-amidating monooxygenase
0.001918	0.160294	SARAF	store-operated calcium entry associated regulatory factor
0.0019217	0.504269	PPP1R3A	protein phosphatase 1 regulatory subunit 3A
0.001965	-0.431744	GINS4	GINS complex subunit 4
0.0019658	0.168444	SATB1	SATB homeobox 1
0.002012	-0.370282	PRKAR1B	protein kinase cAMP-dependent type I regulatory subunit beta
0.0020259	-0.390854	CHRNA5	cholinergic receptor nicotinic alpha 5 subunit
0.0020792	0.552206	KLF9	Kruppel like factor 9
0.0021034	-0.465349	CFAP74	cilia and flagella associated protein 74
0.0021184	0.270206	DCK	deoxycytidine kinase
0.0021479	0.146659	SRP72	signal recognition particle 72
0.0021583	0.786759	PSPH	phosphoserine phosphatase
0.0021904	0.151428	PUM2	pumilio RNA binding family member 2
0.0022053	0.320576	MYBL1	MYB proto-oncogene like 1
0.0023469	0.243037	DYRK2	dual specificity tyrosine phosphorylation regulated kinase 2
0.0023815	-0.368678	MEIS1	Meis homeobox 1
0.0023856	-0.207977	CBX5	chromobox 5
0.0023875	-0.265006	YIPF6	Yip1 domain family member 6
0.0024222	-0.428577	CPM	carboxypeptidase M
0.0024291	0.241583	MAF	MAF bZIP transcription factor
0.0024382	-0.573087	ELAVL2	ELAV like neuron-specific RNA binding protein 2
0.0024497	0.586702	KRR1	KRR1, small subunit processome component homolog
0.0024661	-0.120267	PAFAH1B1	platelet activating factor acetylhydrolase 1b regulatory subunit 1
0.0025146	0.365271	LOC101060399	cerebellar degeneration-related protein 2
0.0025146	0.365271	CDR2	cerebellar degeneration related protein 2
0.002545	0.313448	MAGEF1	MAGE family member F1
0.0025629	-0.406434	COL13A1	collagen type XIII alpha 1 chain
0.0025843	0.323578	UPK3B	uroplakin 3B
0.0026872	-0.174404	BCL6	B-cell CLL/lymphoma 6
0.002828	-0.169073	GRHPR	glyoxylate and hydroxypyruvate reductase
0.0028924	0.179356	CYLD	CYLD lysine 63 deubiquitinase
0.0029825	0.161171	PDIA6	protein disulfide isomerase family A member 6
0.0030245	0.159136	PDE4B	phosphodiesterase 4B
0.0030277	0.133518	FAM208A	family with sequence similarity 208 member A
0.0030445	-0.371891	C16orf95	chromosome 16 open reading frame 95
0.0031435	0.24539	MROH7-TTC4	MROH7-TTC4 readthrough (NMD candidate)
0.0031435	0.24539	TTC4	tetratricopeptide repeat domain 4
0.0031977	0.133697	YY1	YY1 transcription factor
0.0032322	0.355305	THADA	THADA, armadillo repeat containing
0.003305	-0.124192	RNF24	ring finger protein 24
0.0033216	0.128105	NDUFS7	NADH:ubiquinone oxidoreductase core subunit S7
0.0033585	0.110984	CECR5	cat eye syndrome chromosome region, candidate 5
0.0033677	0.13431	UBE3A	ubiquitin protein ligase E3A
0.0033836	-0.124423	NLRP1	NLR family pyrin domain containing 1
0.0034888	0.412607	C1orf50	chromosome 1 open reading frame 50
0.0034912	-0.465434	ID4	inhibitor of DNA binding 4, HLH protein
0.0035111	-0.208308	FAM118A	family with sequence similarity 118 member A
0.0035558	-0.152614	GPSM3	G-protein signaling modulator 3
0.0035637	-0.640584	ZNF80	zinc finger protein 80
0.0038087	-0.133695	MTF1	metal regulatory transcription factor 1
0.0038418	0.468952	SYNJ2	synaptojanin 2
0.0039093	-0.161847	ARHGAP4	Rho GTPase activating protein 4
0.0039847	0.172819	MBNL1	muscleblind like splicing regulator 1
0.004001	0.255122	GZMB	granzyme B
0.0040125	0.141237	SCP2	sterol carrier protein 2
0.0040162	0.108753	PAPOLA	poly(A) polymerase alpha
0.0040218	0.288187	PPIG	peptidylprolyl isomerase G
0.0040287	-0.272475	STC2	stanniocalcin 2
0.0040713	0.36287	ITGAV	integrin subunit alpha V
0.0041039	-0.380997	PIP	prolactin induced protein
0.0041145	-0.281325	FUT7	fucosyltransferase 7
0.0041311	0.180781	HSPH1	heat shock protein family H (Hsp110) member 1
0.0041389	0.163772	PTPN11	protein tyrosine phosphatase, non-receptor type 11
0.0041609	0.151413	SYNCRIP	synaptotagmin binding cytoplasmic RNA interacting protein
0.0041718	0.380676	AGPAT4	1-acylglycerol-3-phosphate O-acyltransferase 4
0.0042326	-0.113162	AK2	adenylate kinase 2
0.0042434	0.303103	PRPF4B	pre-mRNA processing factor 4B
0.0042789	-0.212197	PTP4A1	protein tyrosine phosphatase type IVA, member 1
0.0043102	0.315247	RPL13P5	ribosomal protein L13 pseudogene 5
0.0043102	0.315247	LRRC23	leucine rich repeat containing 23
0.0043305	0.180479	HNRNPA0	heterogeneous nuclear ribonucleoprotein A0
0.004349	0.39977	CLSTN3	calsyntenin 3
0.0044069	-0.14431	MGLL	monoglyceride lipase
0.0044191	0.260418	SH3YL1	SH3 and SYLF domain containing 1
0.0045539	-0.131457	MAN2A2	mannosidase alpha class 2A member 2
0.0046084	0.140606	MIR3652	microRNA 3652
0.0046084	0.140606	HSP90B1	heat shock protein 90 beta family member 1
0.0046288	0.136834	RAP1B	RAP1B, member of RAS oncogene family
0.0046354	-0.387819	PVR	poliovirus receptor
0.0046796	-0.157133	NFYC	nuclear transcription factor Y subunit gamma
0.00475	0.17063	PRKACB	protein kinase cAMP-activated catalytic subunit beta
0.0047508	0.129188	FYN	FYN proto-oncogene, Src family tyrosine kinase
0.0047881	0.129537	ACP1	acid phosphatase 1, soluble
0.0048701	-0.521858	SPO11	SPO11, initiator of meiotic double stranded breaks
0.0048854	0.127095	CERK	ceramide kinase
0.0049078	0.436259	GATA3	GATA binding protein 3
0.0049158	-0.277759	VAC14	Vac14, PIKFYVE complex component
0.0049553	0.154875	YWHAQ	tyrosine 3-monooxygenase/tryptophan 5-monooxygenase activation protein theta
0.0049686	-0.132466	SH3TC1	SH3 domain and tetratricopeptide repeats 1
0.0049761	-0.444211	MAOA	monoamine oxidase A
0.0049941	0.335544	CEL	carboxyl ester lipase
0.0050053	-0.250438	FEV	FEV, ETS transcription factor
0.0050504	-0.246251	HIST3H2A	histone cluster 3, H2a
0.0050607	-0.254178	DCAF15	DDB1 and CUL4 associated factor 15
0.0050818	-0.320613	NCOA3	nuclear receptor coactivator 3
0.0051081	0.42959	CAND2	cullin associated and neddylation dissociated 2 (putative)
0.0051507	0.113796	SETSIP	SET-like protein
0.0051507	0.113796	SET	SET nuclear proto-oncogene
0.0051584	0.272223	KLHL3	kelch like family member 3
0.0051863	-0.391229	ERC2-IT1	ERC2 intronic transcript 1
0.0052562	0.363745	TIA1	TIA1 cytotoxic granule-associated RNA binding protein
0.0053249	-0.284855	SYNGR1	synaptogyrin 1
0.0053286	0.154294	RB1CC1	RB1 inducible coiled-coil 1
0.0053811	0.304359	MXRA7	matrix remodeling associated 7
0.0054347	-0.121769	CPSF4	cleavage and polyadenylation specific factor 4
0.0054405	0.295808	AP3D1	adaptor related protein complex 3 delta 1 subunit
0.0054689	0.277865	MRPS31	mitochondrial ribosomal protein S31
0.0054816	-0.3737	ARRB1	arrestin beta 1
0.0055087	-0.189643	USB1	U6 snRNA biogenesis phosphodiesterase 1
0.0055595	-0.143921	ZDHHC18	zinc finger DHHC-type containing 18
0.0055901	-0.313774	STYK1	serine/threonine/tyrosine kinase 1
0.0056651	-0.478017	KRT13	keratin 13
0.0057238	-0.571765	PBRM1	polybromo 1
0.0057523	0.352997	ABCB7	ATP binding cassette subfamily B member 7
0.0057621	0.376076	MINPP1	multiple inositol-polyphosphate phosphatase 1
0.0057918	0.114211	TRIM39-RPP21	TRIM39-RPP21 readthrough
0.0057918	0.114211	RPP21	ribonuclease P/MRP subunit p21
0.0057918	0.114211	TRIM39	tripartite motif containing 39
0.0058332	0.126308	REXO2	RNA exonuclease 2
0.0058637	0.23549	LOC102724250	neuroblastoma breakpoint family member 1
0.0058637	0.23549	NBPF26	neuroblastoma breakpoint family member 26
0.0058637	0.23549	NBPF19	neuroblastoma breakpoint family member 19
0.0058637	0.23549	NBPF10	neuroblastoma breakpoint family member 10
0.0058637	0.23549	NBPF15	neuroblastoma breakpoint family member 15
0.0058637	0.23549	NBPF11	neuroblastoma breakpoint family member 11
0.0058637	0.23549	NBPF1	neuroblastoma breakpoint family member 1
0.0058637	0.23549	NBPF14	neuroblastoma breakpoint family member 14
0.0058925	-0.131469	PLAUR	plasminogen activator, urokinase receptor
0.0059216	0.135287	ATMIN	ATM interactor
0.0059754	0.192826	IL6ST	interleukin 6 signal transducer
0.0060213	0.305216	CLIC3	chloride intracellular channel 3
0.0060358	-0.343145	GEMIN7	gem nuclear organelle associated protein 7
0.0060689	0.149285	KLHL9	kelch like family member 9
0.0060975	-0.284839	FAM65A	family with sequence similarity 65 member A
0.0061043	0.345757	CACNA1C	calcium voltage-gated channel subunit alpha1 C
0.0061537	0.198618	PRKX	protein kinase, X-linked
0.0061618	-0.28779	OAS3	2'-5'-oligoadenylate synthetase 3
0.0061647	0.11468	DYRK1A	dual specificity tyrosine phosphorylation regulated kinase 1A
0.0062357	0.137803	MCM7	minichromosome maintenance complex component 7
0.0062417	0.298576	TSPAN1	tetraspanin 1
0.0062456	-0.313261	RELA	RELA proto-oncogene, NF-kB subunit
0.0062686	-0.514329	CDH11	cadherin 11
0.0062817	0.251975	ZCCHC10	zinc finger CCHC-type containing 10
0.0062972	0.30182	TRPV6	transient receptor potential cation channel subfamily V member 6
0.0063592	0.304188	SPECC1L	sperm antigen with calponin homology and coiled-coil domains 1 like
0.006414	-0.390416	LAMB3	laminin subunit beta 3
0.0064373	-0.127297	FAM214B	family with sequence similarity 214 member B
0.0064709	0.377525	TKTL1	transketolase like 1
0.0065169	0.427888	PDLIM5	PDZ and LIM domain 5
0.0065445	-0.148253	WDR13	WD repeat domain 13
0.0065515	-0.359935	DDC	dopa decarboxylase
0.0065835	-0.420783	RIMBP2	RIMS binding protein 2
0.0066059	-0.095144	BLOC1S1	biogenesis of lysosomal organelles complex 1 subunit 1
0.0066207	-0.173921	AP2A2	adaptor related protein complex 2 alpha 2 subunit
0.006639	0.397559	CCDC7	coiled-coil domain containing 7
0.0066394	0.220471	HNRNPD	heterogeneous nuclear ribonucleoprotein D
0.006686	-0.392916	TM7SF3	transmembrane 7 superfamily member 3
0.0067169	-0.175802	MUT	methylmalonyl-CoA mutase
0.0068216	0.307716	ACOX2	acyl-CoA oxidase 2
0.0069099	-0.272423	HFE	hemochromatosis
0.0069926	-0.116529	CD40	CD40 molecule
0.0070391	0.37334	EHBP1	EH domain binding protein 1
0.0070408	0.118933	RBM8A	RNA binding motif protein 8A
0.0070622	-0.43727	SMAD5	SMAD family member 5
0.0070626	0.126093	GLYR1	glyoxylate reductase 1 homolog
0.0070626	0.126093	SEPT6	septin 6
0.0070824	0.116394	SNORD14D	small nucleolar RNA, C/D box 14D
0.0070824	0.116394	SNORD14C	small nucleolar RNA, C/D box 14C
0.0070824	0.116394	HSPA8	heat shock protein family A (Hsp70) member 8
0.007134	-0.258101	ADM2	adrenomedullin 2
0.0071396	0.411198	POLRMT	RNA polymerase mitochondrial
0.0072074	-0.403891	PRDM10	PR/SET domain 10
0.0072331	-0.34441	KCNJ9	potassium voltage-gated channel subfamily J member 9
0.0072338	0.177272	ZBED5	zinc finger BED-type containing 5
0.0072435	0.131109	CUTA	cutA divalent cation tolerance homolog
0.0072881	-0.414066	PAWR	pro-apoptotic WT1 regulator
0.0073244	0.158398	TCF7	transcription factor 7 (T-cell specific, HMG-box)
0.0073443	0.25947	PPIL2	peptidylprolyl isomerase like 2
0.0073659	0.145704	RPL22	ribosomal protein L22
0.0074167	-0.349095	TBC1D29	TBC1 domain family member 29
0.0074402	-0.384425	PRG3	proteoglycan 3, pro eosinophil major basic protein 2
0.0075146	-0.446631	KRT6A	keratin 6A
0.0075328	-0.148592	CTRL	chymotrypsin like
0.0075347	-0.12667	CLN3	CLN3, battenin
0.0075482	0.171383	CROCCP2	ciliary rootlet coiled-coil, rootletin pseudogene 2
0.007563	-0.325111	TGM5	transglutaminase 5
0.0075733	0.366738	CPM	carboxypeptidase M
0.0076442	-0.392356	PLXNA2	plexin A2
0.0076611	-0.316055	ZNF668	zinc finger protein 668
0.0076814	0.496511	PIBF1	progesterone immunomodulatory binding factor 1
0.0077071	-0.450422	HIST1H2AE	histone cluster 1, H2ae
0.0077722	0.225381	ANXA4	annexin A4
0.0078726	0.384493	ENPP4	ectonucleotide pyrophosphatase/phosphodiesterase 4 (putative)
0.0079542	0.271853	CASP8AP2	caspase 8 associated protein 2
0.0079851	-0.465132	COL4A6	collagen type IV alpha 6 chain
0.0080775	0.338416	KIR3DX1	killer cell immunoglobulin like receptor, three Ig domains X1
0.0081095	0.126416	CALM3	calmodulin 3
0.0081095	0.126416	CALM2	calmodulin 2
0.0081095	0.126416	CALM1	calmodulin 1
0.0081652	0.254584	MVB12B	multivesicular body subunit 12B
0.0081994	0.213171	MDM1	Mdm1 nuclear protein
0.0082845	0.357897	HAUS3	HAUS augmin like complex subunit 3
0.0083104	-0.116727	STXBP2	syntaxin binding protein 2
0.0083868	0.188504	PPP1R2	protein phosphatase 1 regulatory inhibitor subunit 2
0.0084489	-0.296349	CCNA1	cyclin A1
0.0085087	0.483502	ZNF287	zinc finger protein 287
0.0085199	-0.385527	L1CAM	L1 cell adhesion molecule
0.008587	0.210154	TINF2	TERF1 interacting nuclear factor 2
0.0086057	-0.241502	FOLH1B	folate hydrolase 1B
0.0086057	-0.241502	FOLH1	folate hydrolase (prostate-specific membrane antigen) 1
0.0086234	-0.264764	UST	uronyl 2-sulfotransferase
0.0086967	0.134694	PTPRC	protein tyrosine phosphatase, receptor type C
0.0087019	-0.402898	PKP4	plakophilin 4
0.0088018	0.121191	S100A10	S100 calcium binding protein A10
0.0088127	0.0969569	GNAI3	G protein subunit alpha i3
0.0088127	-0.408923	CADM3	cell adhesion molecule 3
0.0088132	-0.170013	PITPNM1	phosphatidylinositol transfer protein membrane associated 1
0.0088445	0.107812	EIF4B	eukaryotic translation initiation factor 4B
0.0089093	0.165078	SLC38A1	solute carrier family 38 member 1
0.0089258	-0.34023	CDRT1	CMT1A duplicated region transcript 1
0.0089634	-0.164894	RNF19B	ring finger protein 19B
0.0089915	-0.358044	POLR2A	RNA polymerase II subunit A
0.0090174	0.302723	PLEKHG3	pleckstrin homology and RhoGEF domain containing G3
0.0090322	0.344292	PIGK	phosphatidylinositol glycan anchor biosynthesis class K
0.009034	-0.227524	RARA	retinoic acid receptor alpha
0.0090806	0.221982	ACBD3	acyl-CoA binding domain containing 3
0.0090951	0.203038	LRPPRC	leucine rich pentatricopeptide repeat containing
0.0091967	-0.160027	RXRA	retinoid X receptor alpha
0.0093471	-0.102326	SH3BP2	SH3 domain binding protein 2
0.0093678	0.163545	PDHB	pyruvate dehydrogenase (lipoamide) beta
0.0093844	0.235324	RBFOX2	RNA binding protein, fox-1 homolog 2
0.0094482	-0.0998671	ZMIZ2	zinc finger MIZ-type containing 2
0.0094703	-0.354996	PTPN21	protein tyrosine phosphatase, non-receptor type 21
0.0095455	-0.3187	MED24	mediator complex subunit 24
0.0096167	0.417403	B3GALT4	beta-1,3-galactosyltransferase 4
0.0096602	0.141009	WBP11	WW domain binding protein 11
0.0096987	-0.407177	MED14	mediator complex subunit 14
0.0097175	0.128017	ARL4C	ADP ribosylation factor like GTPase 4C
0.0097325	-0.391636	UNC5C	unc-5 netrin receptor C
0.0097582	0.290972	LOC101926921	uncharacterized LOC101926921
0.0097582	0.290972	DAB2	DAB2, clathrin adaptor protein
0.0097585	-0.3194	KCNC3	potassium voltage-gated channel subfamily C member 3
0.0098126	0.337433	ZDHHC17	zinc finger DHHC-type containing 17
0.0098857	0.234453	CDK9	cyclin dependent kinase 9
0.0099165	-0.337117	WDFY3	WD repeat and FYVE domain containing 3
0.0099324	-0.264307	CHRM3	cholinergic receptor muscarinic 3
0.0100187	0.229864	RANGRF	RAN guanine nucleotide release factor
0.010072	-0.382332	NT5DC2	5'-nucleotidase domain containing 2
0.010126	0.138566	FOXO1	forkhead box O1
0.0101314	-0.295651	SMUG1	single-strand-selective monofunctional uracil-DNA glycosylase 1
0.0101605	-0.350031	OGDH	oxoglutarate dehydrogenase
0.0101653	-0.163568	SPTAN1	spectrin alpha, non-erythrocytic 1
0.0101975	0.174278	CREB1	cAMP responsive element binding protein 1
0.0102053	-0.527774	FN1	fibronectin 1
0.0102204	-0.214444	SERPINB8	serpin family B member 8
0.0102412	-0.293365	HIST1H2AH	histone cluster 1, H2ah
0.0102412	-0.293365	HIST1H2AG	histone cluster 1, H2ag
0.0102412	-0.293365	HIST1H2AM	histone cluster 1, H2am
0.0102412	-0.293365	HIST1H2AL	histone cluster 1, H2al
0.0102412	-0.293365	HIST1H2AK	histone cluster 1, H2ak
0.0102412	-0.293365	HIST1H2AI	histone cluster 1, H2ai
0.0102465	0.141464	HSP90AA1	heat shock protein 90 alpha family class A member 1
0.0102554	0.170722	CPD	carboxypeptidase D
0.0103047	-0.138243	CRADD	CASP2 and RIPK1 domain containing adaptor with death domain
0.0103072	0.303367	RITA1	RBPJ interacting and tubulin associated 1
0.0103095	0.120253	TNFAIP3	TNF alpha induced protein 3
0.0103176	-0.16451	ARRB2	arrestin beta 2
0.0104056	-0.327479	CAMSAP2	calmodulin regulated spectrin associated protein family member 2
0.010422	0.224085	CACNA1H	calcium voltage-gated channel subunit alpha1 H
0.010426	-0.251893	GLP1R	glucagon like peptide 1 receptor
0.0104527	0.12457	PURA	purine rich element binding protein A
0.0104654	-0.137914	NGLY1	N-glycanase 1
0.0105007	0.450246	CEP57	centrosomal protein 57
0.0105035	0.43307	ATP2C1	ATPase secretory pathway Ca2+ transporting 1
0.0105058	0.281237	GSTA1	glutathione S-transferase alpha 1
0.0105085	0.457905	C12orf29	chromosome 12 open reading frame 29
0.0105261	0.194651	HOPX	HOP homeobox
0.0105406	-0.120712	CPNE1	copine 1
0.0105525	-0.321555	PEX11A	peroxisomal biogenesis factor 11 alpha
0.0106239	0.0973136	USP34	ubiquitin specific peptidase 34
0.0106632	0.0988878	NDUFB8	NADH:ubiquinone oxidoreductase subunit B8
0.0107238	-0.181102	BTRC	beta-transducin repeat containing E3 ubiquitin protein ligase
0.0107256	0.482066	LOC1720	dihydrofolate reductase pseudogene
0.0107276	0.102859	REEP5	receptor accessory protein 5
0.0107382	-0.404427	MMP19	matrix metallopeptidase 19
0.0107575	-0.212575	UBOX5	U-box domain containing 5
0.0108727	0.157081	ERBIN	erbb2 interacting protein
0.0109033	0.206391	ZMYM4	zinc finger MYM-type containing 4
0.0109164	0.39994	GART	phosphoribosylglycinamide formyltransferase, phosphoribosylglycinamide synthetase, phosphoribosylaminoimidazole synthetase
0.0109498	0.137721	SMARCA2	SWI/SNF related, matrix associated, actin dependent regulator of chromatin, subfamily a, member 2
0.0109635	0.169893	TGFBR3	transforming growth factor beta receptor 3
0.0109761	-0.247755	PDPR	pyruvate dehydrogenase phosphatase regulatory subunit
0.0110285	-0.138747	DTX2P1-UPK3BP1-PMS2P11	DTX2P1-UPK3BP1-PMS2P11 readthrough, transcribed pseudogene
0.0111923	-0.463124	ASB4	ankyrin repeat and SOCS box containing 4
0.0112011	-0.440819	PXN	paxillin
0.0112064	-0.349357	HIST1H3D	histone cluster 1, H3d
0.0112064	-0.349357	HIST1H2AD	histone cluster 1, H2ad
0.0112463	0.340813	TBCCD1	TBCC domain containing 1
0.0112757	0.391594	SLC44A1	solute carrier family 44 member 1
0.0114024	0.181396	ELAVL1	ELAV like RNA binding protein 1
0.0114311	-0.285303	FCN2	ficolin 2
0.0114632	-0.420185	CC2D1A	coiled-coil and C2 domain containing 1A
0.0114894	0.227662	PFN2	profilin 2
0.0114931	0.0835913	TMED10	transmembrane p24 trafficking protein 10
0.0115023	-0.41419	ADRA1B	adrenoceptor alpha 1B
0.0115266	0.0835709	FIBP	FGF1 intracellular binding protein
0.0115437	0.194583	LOC101928625	uncharacterized LOC101928625
0.0115437	0.194583	MED21	mediator complex subunit 21
0.0115711	0.173536	TOP3A	topoisomerase (DNA) III alpha
0.0115824	0.0951911	KRT10	keratin 10
0.0115973	-0.442583	PBX1	PBX homeobox 1
0.0116657	-0.473098	SPOCK3	sparc/osteonectin, cwcv and kazal-like domains proteoglycan (testican) 3
0.0116701	0.172998	CBLB	Cbl proto-oncogene B
0.0117175	0.464108	RECK	reversion inducing cysteine rich protein with kazal motifs
0.0117538	-0.389867	GPD2	glycerol-3-phosphate dehydrogenase 2
0.0118077	-0.30906	Igk	immunoglobulin kappa chain complex
0.0118178	-0.265622	TRAF3IP2	TRAF3 interacting protein 2
0.0119065	-0.440036	GPLD1	glycosylphosphatidylinositol specific phospholipase D1
0.0119293	-0.158122	MAP3K5	mitogen-activated protein kinase kinase kinase 5
0.0119303	-0.288808	LOC101928634	uncharacterized LOC101928634
0.0119303	-0.288808	SNORA67	small nucleolar RNA, H/ACA box 67
0.0119303	-0.288808	CD68	CD68 molecule
0.0119594	0.191101	STK17B	serine/threonine kinase 17b
0.0119617	0.481089	TRPC2	transient receptor potential cation channel subfamily C member 2, pseudogene
0.0120157	0.162432	CEPT1	choline/ethanolamine phosphotransferase 1
0.0120518	-0.245932	SPI1	Spi-1 proto-oncogene
0.0120524	-0.364804	STAMBPL1	STAM binding protein like 1
0.0120949	-0.37538	BFSP2	beaded filament structural protein 2
0.0121963	0.138899	SLC25A38	solute carrier family 25 member 38
0.0122334	-0.443638	ARHGDIA	Rho GDP dissociation inhibitor alpha
0.0122513	-0.177545	KCNJ15	potassium voltage-gated channel subfamily J member 15
0.0122543	-0.218424	ALX1	ALX homeobox 1
0.0122814	0.108995	FNBP4	formin binding protein 4
0.0123184	0.155315	PPP2R5C	protein phosphatase 2 regulatory subunit B'gamma
0.01233	0.226386	SMARCA4	SWI/SNF related, matrix associated, actin dependent regulator of chromatin, subfamily a, member 4
0.0123316	0.153102	DDX28	DEAD-box helicase 28
0.01239	-0.428504	HIST2H4B	histone cluster 2, H4b
0.01239	-0.428504	HIST4H4	histone cluster 4, H4
0.01239	-0.428504	HIST2H4A	histone cluster 2, H4a
0.01239	-0.428504	HIST1H4L	histone cluster 1, H4l
0.01239	-0.428504	HIST1H4E	histone cluster 1, H4e
0.01239	-0.428504	HIST1H4B	histone cluster 1, H4b
0.01239	-0.428504	HIST1H4H	histone cluster 1, H4h
0.01239	-0.428504	HIST1H4C	histone cluster 1, H4c
0.01239	-0.428504	HIST1H4J	histone cluster 1, H4j
0.01239	-0.428504	HIST1H4K	histone cluster 1, H4k
0.01239	-0.428504	HIST1H4F	histone cluster 1, H4f
0.01239	-0.428504	HIST1H4D	histone cluster 1, H4d
0.01239	-0.428504	HIST1H4A	histone cluster 1, H4a
0.01239	-0.428504	HIST1H4I	histone cluster 1, H4i
0.0124391	0.289914	PCOLCE	procollagen C-endopeptidase enhancer
0.012451	-0.376574	MRE11A	MRE11 homolog A, double strand break repair nuclease
0.0124586	0.249217	DXO	decapping exoribonuclease
0.0125045	0.327262	LOC202181	SUMO interacting motifs containing 1 pseudogene
0.0125154	0.418555	KNOP1	lysine rich nucleolar protein 1
0.0125154	0.226054	LOC100630923	LOC100289561-PRKRIP1 readthrough
0.0125154	0.226054	LOC100289561	uncharacterized LOC100289561
0.0125154	0.226054	PRKRIP1	PRKR interacting protein 1 (IL11 inducible)
0.0125608	0.11795	BZW1	basic leucine zipper and W2 domains 1
0.0125653	0.120181	SET	SET nuclear proto-oncogene
0.0125848	0.0863002	NCK2	NCK adaptor protein 2
0.0126056	0.506367	ZBTB1	zinc finger and BTB domain containing 1
0.0126504	-0.408945	HIST1H3B	histone cluster 1, H3b
0.0126634	0.172584	TMEM185B	transmembrane protein 185B
0.0126727	0.105738	DUSP11	dual specificity phosphatase 11
0.0127104	0.223059	ZC3H7B	zinc finger CCCH-type containing 7B
0.0127418	-0.23869	LPCAT3	lysophosphatidylcholine acyltransferase 3
0.0127603	0.0943872	CD44	CD44 molecule (Indian blood group)
0.0127862	-0.176674	KIAA0586	KIAA0586
0.0127976	0.138401	ZAP70	zeta chain of T cell receptor associated protein kinase 70
0.0128509	-0.350587	C21orf2	chromosome 21 open reading frame 2
0.0128696	0.125219	EIF3L	eukaryotic translation initiation factor 3 subunit L
0.0128762	0.10469	TMEM35B	transmembrane protein 35B
0.0128762	0.10469	ZMYM6	zinc finger MYM-type containing 6
0.0129333	-0.227321	FKBP8	FK506 binding protein 8
0.0129996	0.201159	PAPOLA	poly(A) polymerase alpha
0.0130292	-0.174264	RMND5A	required for meiotic nuclear division 5 homolog A
0.0130504	-0.252743	OGFR	opioid growth factor receptor
0.0130944	0.225928	PPP3CC	protein phosphatase 3 catalytic subunit gamma
0.0131292	0.325408	SPIN2B	spindlin family member 2B
0.0131292	0.325408	SPIN2A	spindlin family member 2A
0.0131327	0.239121	RAPGEF2	Rap guanine nucleotide exchange factor 2
0.0131808	-0.382494	PPBPP2	pro-platelet basic protein pseudogene 2
0.0131925	-0.112866	NRF1	nuclear respiratory factor 1
0.0132843	-0.451753	GATA6	GATA binding protein 6
0.0133147	0.127605	GCC2	GRIP and coiled-coil domain containing 2
0.0133299	0.2404	RBL2	RB transcriptional corepressor like 2
0.0133397	0.280094	INSL6	insulin like 6
0.0134187	0.198896	PRKD3	protein kinase D3
0.0134557	-0.349674	FGFR1	fibroblast growth factor receptor 1
0.0134559	0.213943	LMO4	LIM domain only 4
0.0135308	0.0888204	DNAJB1	DnaJ heat shock protein family (Hsp40) member B1
0.0135737	0.397527	CD3G	CD3g molecule
0.0135765	0.325292	DLAT	dihydrolipoamide S-acetyltransferase
0.0135836	0.288876	ANKRD46	ankyrin repeat domain 46
0.0136081	0.300159	ARMCX5	armadillo repeat containing, X-linked 5
0.0136094	0.119617	NOL7	nucleolar protein 7
0.0136179	0.307217	SLC25A4	solute carrier family 25 member 4
0.0136447	-0.500212	TFPI	tissue factor pathway inhibitor
0.0137136	0.401879	TLL2	tolloid like 2
0.013723	0.23536	MRPS18B	mitochondrial ribosomal protein S18B
0.0137475	-0.20442	TRIM45	tripartite motif containing 45
0.0137569	-0.323735	DENND1A	DENN domain containing 1A
0.0137872	0.15802	ZNF91	zinc finger protein 91
0.0138171	0.0906999	CS	citrate synthase
0.013844	0.166511	MBNL1	muscleblind like splicing regulator 1
0.0139219	-0.462782	PPP2R3A	protein phosphatase 2 regulatory subunit B''alpha
0.0139457	0.238227	EXD3	exonuclease 3'-5' domain containing 3
0.0140879	-0.39115	TMEM51	transmembrane protein 51
0.014146	0.493681	MPHOSPH9	M-phase phosphoprotein 9
0.0142432	-0.120527	CLTB	clathrin light chain B
0.0142565	0.271922	PAIP1	poly(A) binding protein interacting protein 1
0.0142568	0.34767	FBXL15	F-box and leucine rich repeat protein 15
0.0142576	-0.457682	MRPS18C	mitochondrial ribosomal protein S18C
0.0142927	-0.155829	C12orf4	chromosome 12 open reading frame 4
0.0143356	-0.139209	APOBR	apolipoprotein B receptor
0.0144057	-0.426828	CDKL3	cyclin dependent kinase like 3
0.0144161	0.339847	HCN2	hyperpolarization activated cyclic nucleotide gated potassium channel 2
0.014443	0.136565	BTAF1	B-TFIID TATA-box binding protein associated factor 1
0.0144624	-0.385383	OR12D3	olfactory receptor family 12 subfamily D member 3
0.014532	0.315935	HDLBP	high density lipoprotein binding protein
0.014674	0.150246	STK26	serine/threonine protein kinase 26
0.0146836	0.18814	ANKRD11	ankyrin repeat domain 11
0.0146905	-0.255695	HERC5	HECT and RLD domain containing E3 ubiquitin protein ligase 5
0.0146951	0.130002	ELF1	E74 like ETS transcription factor 1
0.0147217	0.203926	ARRB1	arrestin beta 1
0.0147509	-0.426722	HIST1H2BO	histone cluster 1, H2bo
0.0148336	0.197941	RNF138	ring finger protein 138
0.0148406	-0.378137	TRIO	trio Rho guanine nucleotide exchange factor
0.014877	-0.1799	MYH14	myosin, heavy chain 14, non-muscle
0.0149367	-0.119135	HS1BP3	HCLS1 binding protein 3
0.0149772	-0.287965	TFAP4	transcription factor AP-4
0.015007	-0.28133	DHRS2	dehydrogenase/reductase 2
0.0150453	0.160759	BAG3	BCL2 associated athanogene 3
0.0150515	-0.216575	BMP8A	bone morphogenetic protein 8a
0.0150927	0.236306	PPP1R1A	protein phosphatase 1 regulatory inhibitor subunit 1A
0.0151094	-0.154438	STAU2	staufen double-stranded RNA binding protein 2
0.0151964	-0.360415	PRKAR1AP1	protein kinase cAMP-dependent type I regulatory subunit alpha pseudogene 1
0.0152365	-0.278359	IL22	interleukin 22
0.015291	0.383207	SIGLEC8	sialic acid binding Ig like lectin 8
0.0153631	0.402234	LGALS2	galectin 2
0.0153711	0.155559	FLT3LG	fms related tyrosine kinase 3 ligand
0.0153858	-0.148321	TRIB3	tribbles pseudokinase 3
0.0154003	0.139751	SGK1	serum/glucocorticoid regulated kinase 1
0.0154727	0.104852	RNF38	ring finger protein 38
0.0155225	0.201699	ZFYVE16	zinc finger FYVE-type containing 16
0.015527	0.122955	CHCHD3	coiled-coil-helix-coiled-coil-helix domain containing 3
0.0155441	-0.0742746	SASH3	SAM and SH3 domain containing 3
0.0155457	0.343457	PLPP3	phospholipid phosphatase 3
0.01555	0.190378	HADH	hydroxyacyl-CoA dehydrogenase
0.0156406	0.0811685	EIF5	eukaryotic translation initiation factor 5
0.0156708	-0.298192	ZMYND10	zinc finger MYND-type containing 10
0.0157023	0.12026	PTPRC	protein tyrosine phosphatase, receptor type C
0.0157028	0.131121	TNPO1	transportin 1
0.0157689	0.326388	CHRNE	cholinergic receptor nicotinic epsilon subunit
0.0158558	0.125406	PRMT2	protein arginine methyltransferase 2
0.0158654	-0.355785	CACNA1G	calcium voltage-gated channel subunit alpha1 G
0.0158897	0.132153	RCC1L	RCC1 like
0.015913	0.182239	MAP3K7CL	MAP3K7 C-terminal like
0.0159716	-0.345627	CDH8	cadherin 8
0.0161062	0.119332	CDKN1B	cyclin dependent kinase inhibitor 1B
0.0161144	-0.408785	PRKDC	protein kinase, DNA-activated, catalytic polypeptide
0.0161434	0.374032	TNFRSF4	TNF receptor superfamily member 4
0.0161722	0.148098	GIMAP6	GTPase, IMAP family member 6
0.0161739	-0.34638	NPC1L1	NPC1 like intracellular cholesterol transporter 1
0.0162615	-0.308428	PTK2B	protein tyrosine kinase 2 beta
0.0162618	0.340099	DES	desmin
0.0163047	-0.280005	PSD3	pleckstrin and Sec7 domain containing 3
0.0163379	0.140485	IARS	isoleucyl-tRNA synthetase
0.0163631	-0.346459	EMP1	epithelial membrane protein 1
0.0163644	0.40843	GPRC5B	G protein-coupled receptor class C group 5 member B
0.0163736	-0.293909	MIR6756	microRNA 6756
0.0163736	-0.293909	MCAM	melanoma cell adhesion molecule
0.0164037	0.439688	RAD51	RAD51 recombinase
0.0164394	-0.428915	G6PC	glucose-6-phosphatase catalytic subunit
0.0164416	-0.204501	C1orf61	chromosome 1 open reading frame 61
0.0164592	0.143546	LSM7	LSM7 homolog, U6 small nuclear RNA and mRNA degradation associated
0.0164867	0.294045	SCNN1A	sodium channel epithelial 1 alpha subunit
0.016531	-0.196791	EPHB2	EPH receptor B2
0.0165622	0.170506	CCR7	C-C motif chemokine receptor 7
0.0165627	0.176749	DEXI	Dexi homolog
0.016596	-0.326041	LOC51145	uncharacterized LOC51145
0.0166029	0.129969	RTF1	RTF1 homolog, Paf1/RNA polymerase II complex component
0.016614	0.255497	ATF1	activating transcription factor 1
0.0166584	-0.271311	TDRKH	tudor and KH domain containing
0.0167166	0.166677	RAB33A	RAB33A, member RAS oncogene family
0.0167474	0.112051	SNORD19B	small nucleolar RNA, C/D box 19B
0.0167474	0.112051	GNL3	G protein nucleolar 3
0.0168704	0.231564	RSL1D1	ribosomal L1 domain containing 1
0.0169052	-0.188364	CDK16	cyclin dependent kinase 16
0.0169563	0.180923	THAP12	THAP domain containing 12
0.0170078	0.181277	TACC1	transforming acidic coiled-coil containing protein 1
0.0170291	-0.207457	TCF7L2	transcription factor 7 like 2
0.0172023	-0.241843	OR10H3	olfactory receptor family 10 subfamily H member 3
0.0172079	0.131551	WIPF1	WAS/WASL interacting protein family member 1
0.0172332	0.103046	SERINC1	serine incorporator 1
0.0172652	0.199858	PAM	peptidylglycine alpha-amidating monooxygenase
0.017293	-0.277472	BAHD1	bromo adjacent homology domain containing 1
0.0173021	0.100593	PDIA4	protein disulfide isomerase family A member 4
0.017325	-0.129156	TUBA1C	tubulin alpha 1c
0.0173638	-0.124155	TNFSF12-TNFSF13	TNFSF12-TNFSF13 readthrough
0.0173638	-0.124155	TNFSF13	tumor necrosis factor superfamily member 13
0.0174082	0.122054	SLC38A2	solute carrier family 38 member 2
0.0174261	0.388425	HPN	hepsin
0.0174476	0.104679	HACD2	3-hydroxyacyl-CoA dehydratase 2
0.017459	-0.0869625	CSRP1	cysteine and glycine rich protein 1
0.017492	-0.160059	GGA3	golgi associated, gamma adaptin ear containing, ARF binding protein 3
0.0175906	-0.363984	HSP90B1	heat shock protein 90 beta family member 1
0.0176471	-0.178758	PNPLA2	patatin like phospholipase domain containing 2
0.0176553	0.155919	DDX50	DEAD-box helicase 50
0.0177213	-0.132466	LOC101060835	HLA class II histocompatibility antigen, DQ beta 1 chain-like
0.0177213	-0.132466	LOC100996809	HLA class II histocompatibility antigen, DRB1-10 beta chain-like
0.0177213	-0.132466	HLA-DRB4	major histocompatibility complex, class II, DR beta 4
0.0177213	-0.132466	HLA-DRB3	major histocompatibility complex, class II, DR beta 3
0.0177213	-0.132466	HLA-DRB1	major histocompatibility complex, class II, DR beta 1
0.0177213	-0.132466	HLA-DQB1	major histocompatibility complex, class II, DQ beta 1
0.0177412	-0.149584	PLAUR	plasminogen activator, urokinase receptor
0.0177806	-0.302493	PGBD5	piggyBac transposable element derived 5
0.017801	-0.293783	NKX2-1	NK2 homeobox 1
0.0178305	-0.371766	ESM1	endothelial cell specific molecule 1
0.0178423	0.379025	VRK1	vaccinia related kinase 1
0.0178646	0.149126	RECQL	RecQ like helicase
0.0178897	0.368699	NUP50	nucleoporin 50
0.0179477	-0.379392	ANGEL2	angel homolog 2
0.0180011	0.11119	COPB1	coatomer protein complex subunit beta 1
0.0180014	-0.387463	ABCF2	ATP binding cassette subfamily F member 2
0.0180851	-0.3539	ITGB3	integrin subunit beta 3
0.018165	0.083727	GOLGA7	golgin A7
0.0181897	0.161943	DYNC1LI1	dynein cytoplasmic 1 light intermediate chain 1
0.01819	0.145479	ETF1	eukaryotic translation termination factor 1
0.0182568	0.122153	CUL5	cullin 5
0.0182855	0.109737	SAFB2	scaffold attachment factor B2
0.0182919	-0.16441	DOK3	docking protein 3
0.0184167	0.297468	FUBP1	far upstream element binding protein 1
0.0184255	-0.314718	RNF41	ring finger protein 41
0.0184618	0.365854	RYR2	ryanodine receptor 2
0.018502	0.0934416	HSPD1	heat shock protein family D (Hsp60) member 1
0.0185092	0.278901	ATF6	activating transcription factor 6
0.0185155	0.109171	LOC101928747	uncharacterized LOC101928747
0.0185155	0.109171	RBMX	RNA binding motif protein, X-linked
0.0185155	0.109171	SNORD61	small nucleolar RNA, C/D box 61
0.0185837	-0.393316	VENTXP1	VENT homeobox pseudogene 1
0.018606	-0.215608	ZNF324	zinc finger protein 324
0.0186204	0.407701	HOXA10-HOXA9	HOXA10-HOXA9 readthrough
0.0186204	0.407701	MIR196B	microRNA 196b
0.0186204	0.407701	HOXA9	homeobox A9
0.0186514	0.389863	CNOT4	CCR4-NOT transcription complex subunit 4
0.0186678	-0.365575	FGA	fibrinogen alpha chain
0.0187383	0.163926	DEK	DEK proto-oncogene
0.0187388	0.230669	CDC27	cell division cycle 27
0.0187452	0.223426	LOC101928269	uncharacterized LOC101928269
0.0187452	0.223426	LOC100506403	uncharacterized LOC100506403
0.0187452	0.223426	RUNX1	runt related transcription factor 1
0.0188408	-0.102903	MIIP	migration and invasion inhibitory protein
0.0188583	-0.103403	DCAF8	DDB1 and CUL4 associated factor 8
0.0188673	0.205858	NFATC2IP	nuclear factor of activated T-cells 2 interacting protein
0.0188781	-0.362582	CDC25C	cell division cycle 25C
0.0189168	0.329433	HTR4	5-hydroxytryptamine receptor 4
0.018951	0.290965	SPDEF	SAM pointed domain containing ETS transcription factor
0.0189659	0.155223	PIK3IP1	phosphoinositide-3-kinase interacting protein 1
0.0190197	-0.425285	NOX4	NADPH oxidase 4
0.019061	0.247534	GRM8	glutamate metabotropic receptor 8
0.0190863	-0.28234	ANKRD26	ankyrin repeat domain 26
0.0190985	-0.13454	LILRA2	leukocyte immunoglobulin like receptor A2
0.0191496	0.410989	PHLPP1	PH domain and leucine rich repeat protein phosphatase 1
0.0191539	-0.138466	PDLIM7	PDZ and LIM domain 7
0.0192484	-0.359318	AIF1	allograft inflammatory factor 1
0.0192702	-0.336708	EDN3	endothelin 3
0.0192712	0.117181	BCLAF1	BCL2 associated transcription factor 1
0.0192891	0.250621	ATG2B	autophagy related 2B
0.0192953	0.194608	SLC2A3	solute carrier family 2 member 3
0.019373	-0.297851	ADCY10	adenylate cyclase 10, soluble
0.0193908	0.0883052	LOC441155	zinc finger CCCH-type domain-containing-like
0.0193908	0.0883052	ZC3H11A	zinc finger CCCH-type containing 11A
0.0194282	0.0838654	SUCLG1	succinate-CoA ligase alpha subunit
0.019472	0.172801	FAM208A	family with sequence similarity 208 member A
0.0195067	-0.249838	DCAF8	DDB1 and CUL4 associated factor 8
0.019518	-0.282042	MYBPH	myosin binding protein H
0.019519	-0.409469	KIF24	kinesin family member 24
0.0195299	0.143742	GAS7	growth arrest specific 7
0.0196125	0.125061	RANBP9	RAN binding protein 9
0.0196198	-0.176084	NADK	NAD kinase
0.019625	0.158236	TTC3P1	tetratricopeptide repeat domain 3 pseudogene 1
0.019625	0.158236	TTC3	tetratricopeptide repeat domain 3
0.0197635	-0.299664	RAB11B	RAB11B, member RAS oncogene family
0.0197883	0.130563	TRAM1	translocation associated membrane protein 1
0.0197984	0.170067	GTPBP4	GTP binding protein 4
0.0198311	-0.315173	PON1	paraoxonase 1
0.0199248	-0.402972	GK2	glycerol kinase 2
0.0200535	-0.340037	CHRNA4	cholinergic receptor nicotinic alpha 4 subunit
0.0200624	-0.415269	TMEM100	transmembrane protein 100
0.0200629	0.223855	SAMD14	sterile alpha motif domain containing 14
0.0200859	0.183624	RPL37A	ribosomal protein L37a
0.0201595	0.114417	CDC40	cell division cycle 40
0.020161	0.0885481	MIR3656	microRNA 3656
0.020161	0.0885481	TRAPPC4	trafficking protein particle complex 4
0.020164	-0.293168	MEIS2	Meis homeobox 2
0.020184	-0.237367	SMG6	SMG6, nonsense mediated mRNA decay factor
0.0202394	-0.391924	GALNT3	polypeptide N-acetylgalactosaminyltransferase 3
0.020259	-0.2056	PRR34	proline rich 34
0.020314	-0.101544	ATP2B4	ATPase plasma membrane Ca2+ transporting 4
0.0203556	0.119249	PRPF40A	pre-mRNA processing factor 40 homolog A
0.0204152	-0.359024	FRY	FRY microtubule binding protein
0.0204384	-0.299878	CLPTM1	CLPTM1, transmembrane protein
0.0204784	0.234555	AGGF1	angiogenic factor with G-patch and FHA domains 1
0.0204822	0.235883	MTERF4	mitochondrial transcription termination factor 4
0.0204869	0.123224	RBM39	RNA binding motif protein 39
0.0205015	-0.33738	GREB1L	growth regulation by estrogen in breast cancer 1 like
0.0206717	0.227773	SF1	splicing factor 1
0.020673	0.136025	INTS8	integrator complex subunit 8
0.0207609	-0.233692	GBX1	gastrulation brain homeobox 1
0.0208055	0.142141	LBR	lamin B receptor
0.0208059	0.0920153	CD99	CD99 molecule
0.0208666	0.130759	SLC38A2	solute carrier family 38 member 2
0.0208869	-0.331956	DSC3	desmocollin 3
0.0209595	0.383961	HSD17B2	hydroxysteroid 17-beta dehydrogenase 2
0.0210655	-0.261022	HPS4	HPS4, biogenesis of lysosomal organelles complex 3 subunit 2
0.0210823	0.147821	USP8	ubiquitin specific peptidase 8
0.0211802	-0.297368	NRG2	neuregulin 2
0.0211867	-0.102358	LST1	leukocyte specific transcript 1
0.0212004	0.10389	STAT4	signal transducer and activator of transcription 4
0.0212186	0.10684	KHDRBS1	KH RNA binding domain containing, signal transduction associated 1
0.021222	0.451323	AAMDC	adipogenesis associated Mth938 domain containing
0.0212339	-0.197842	SLN	sarcolipin
0.0212926	-0.444404	CDKAL1	CDK5 regulatory subunit associated protein 1 like 1
0.0213107	0.115397	HSPA9	heat shock protein family A (Hsp70) member 9
0.0213294	0.114955	POLE3	DNA polymerase epsilon 3, accessory subunit
0.0213497	0.21429	GOSR1	golgi SNAP receptor complex member 1
0.0214071	-0.219741	GYPC	glycophorin C (Gerbich blood group)
0.0215256	-0.165858	FFAR2	free fatty acid receptor 2
0.0215474	0.202284	CCDC88C	coiled-coil domain containing 88C
0.0215511	0.203143	ZNF500	zinc finger protein 500
0.0215561	0.136702	SNX10	sorting nexin 10
0.0215983	0.303093	ACACB	acetyl-CoA carboxylase beta
0.0216429	-0.332296	NPBWR2	neuropeptides B/W receptor 2
0.0216798	0.405728	KIAA1024	KIAA1024
0.0216879	0.337454	MUC13	mucin 13, cell surface associated
0.0217839	0.124334	TCEB3	transcription elongation factor B subunit 3
0.021829	0.269808	ADAM22	ADAM metallopeptidase domain 22
0.0219224	-0.242563	ALDH3B2	aldehyde dehydrogenase 3 family member B2
0.0219507	-0.103245	TNFRSF25	TNF receptor superfamily member 25
0.0219556	0.112633	PPP2R5C	protein phosphatase 2 regulatory subunit B'gamma
0.0219604	-0.208896	ACRV1	acrosomal vesicle protein 1
0.0219961	-0.249516	MYH11	myosin heavy chain 11
0.0220016	-0.29299	ZNF518A	zinc finger protein 518A
0.0221187	0.0945384	MIR5047	microRNA 5047
0.0221187	0.0945384	MIR3064	microRNA 3064
0.0221187	0.0945384	DDX5	DEAD-box helicase 5
0.0221415	-0.279916	GNA11	G protein subunit alpha 11
0.0221691	-0.358147	CBX4	chromobox 4
0.0222288	0.0988844	SRSF3	serine and arginine rich splicing factor 3
0.0223426	0.169291	CDK19	cyclin dependent kinase 19
0.0223452	0.0985172	CTCF	CCCTC-binding factor
0.0223683	-0.26071	NRP2	neuropilin 2
0.0223696	-0.239444	MIR6849	microRNA 6849
0.0223696	-0.239444	MIR1234	microRNA 1234
0.0223696	-0.239444	MIR939	microRNA 939
0.0223696	-0.239444	CPSF1	cleavage and polyadenylation specific factor 1
0.0223724	-0.238914	NR0B2	nuclear receptor subfamily 0 group B member 2
0.0224258	-0.232127	ARNT	aryl hydrocarbon receptor nuclear translocator
0.0224339	0.120052	TXNDC15	thioredoxin domain containing 15
0.0224369	-0.244838	HSF1	heat shock transcription factor 1
0.0224949	0.117918	EIF3J	eukaryotic translation initiation factor 3 subunit J
0.0225285	0.146175	SACM1L	SAC1 suppressor of actin mutations 1-like (yeast)
0.0225552	-0.290735	MIR6875	microRNA 6875
0.0225552	-0.290735	TRIP6	thyroid hormone receptor interactor 6
0.0225767	-0.276741	SEC61A2	Sec61 translocon alpha 2 subunit
0.0225919	0.258721	REG1CP	regenerating family member 1 gamma, pseudogene
0.0225944	-0.239249	LINC01260	long intergenic non-protein coding RNA 1260
0.0226602	-0.288394	FUBP1	far upstream element binding protein 1
0.0227106	-0.256972	CNGB3	cyclic nucleotide gated channel beta 3
0.0227609	0.276108	KIR2DS1	killer cell immunoglobulin like receptor, two Ig domains and short cytoplasmic tail 1
0.0227731	0.188089	CLINT1	clathrin interactor 1
0.0228195	0.249892	PRORY	proline rich, Y-linked
0.0228264	0.0758243	ARL6IP5	ADP ribosylation factor like GTPase 6 interacting protein 5
0.0228588	0.301279	LOC101928718	uncharacterized LOC101928718
0.0228588	0.301279	FAM212B	family with sequence similarity 212 member B
0.0228922	0.221405	ATP8A1	ATPase phospholipid transporting 8A1
0.02297	0.351633	ZNF268	zinc finger protein 268
0.0229817	0.122429	CCT6A	chaperonin containing TCP1 subunit 6A
0.0229865	-0.41156	ZC2HC1C	zinc finger C2HC-type containing 1C
0.0230087	0.422222	METTL2A	methyltransferase like 2A
0.0230087	0.422222	METTL2B	methyltransferase like 2B
0.0231073	0.140342	GNE	glucosamine (UDP-N-acetyl)-2-epimerase/N-acetylmannosamine kinase
0.0231645	0.356777	CCDC106	coiled-coil domain containing 106
0.0231782	-0.210802	SLC35E3	solute carrier family 35 member E3
0.0232348	0.245927	TTC37	tetratricopeptide repeat domain 37
0.0232593	0.339991	CDC7	cell division cycle 7
0.0232703	-0.0642708	GRK6	G protein-coupled receptor kinase 6
0.0232731	0.23359	ARL2	ADP ribosylation factor like GTPase 2
0.023363	0.12773	USP1	ubiquitin specific peptidase 1
0.0233666	-0.225903	HSPBP1	HSPA (Hsp70) binding protein 1
0.023541	0.161617	TIA1	TIA1 cytotoxic granule-associated RNA binding protein
0.0235557	0.303318	AKIP1	A-kinase interacting protein 1
0.0236592	-0.184372	FAM3A	family with sequence similarity 3 member A
0.0236887	-0.341842	CMC4	C-X9-C motif containing 4
0.0236887	-0.341842	MTCP1	mature T-cell proliferation 1
0.0237653	-0.0804798	CFL1	cofilin 1
0.0238067	-0.282803	SOX4	SRY-box 4
0.0238242	-0.473145	TMEM144	transmembrane protein 144
0.0238243	0.234599	ATF6B	activating transcription factor 6 beta
0.0238261	-0.332744	ZSWIM8-AS1	ZSWIM8 antisense RNA 1
0.0238261	-0.332744	NDST2	N-deacetylase and N-sulfotransferase 2
0.0238402	-0.1545	44622	membrane associated ring-CH-type finger 2
0.0238501	0.0882872	CIAPIN1	cytokine induced apoptosis inhibitor 1
0.0238815	0.115985	RBM22	RNA binding motif protein 22
0.0238964	-0.261223	MAP4K5	mitogen-activated protein kinase kinase kinase kinase 5
0.0239036	0.171097	TDP1	tyrosyl-DNA phosphodiesterase 1
0.0239066	-0.295324	CHRNA3	cholinergic receptor nicotinic alpha 3 subunit
0.0239326	0.246579	TMED7-TICAM2	TMED7-TICAM2 readthrough
0.0239326	0.246579	TMED7	transmembrane p24 trafficking protein 7
0.0239728	-0.360742	PSG3	pregnancy specific beta-1-glycoprotein 3
0.0239728	-0.360742	PSG11	pregnancy specific beta-1-glycoprotein 11
0.0239995	0.248767	CUL2	cullin 2
0.0240112	0.30876	EPPIN-WFDC6	EPPIN-WFDC6 readthrough
0.0240112	0.30876	EPPIN	epididymal peptidase inhibitor
0.0240216	-0.292986	PHF7	PHD finger protein 7
0.0240899	-0.407245	SIX3	SIX homeobox 3
0.0241193	0.21121	MED14	mediator complex subunit 14
0.0241422	-0.436064	IL2	interleukin 2
0.0241904	0.405247	DMP1	dentin matrix acidic phosphoprotein 1
0.0242328	0.146762	PRKCQ	protein kinase C theta
0.0242433	-0.213239	TMEM104	transmembrane protein 104
0.0242671	-0.420821	PTGER3	prostaglandin E receptor 3
0.0242743	0.119083	YY1	YY1 transcription factor
0.0242916	0.137073	PNRC1	proline rich nuclear receptor coactivator 1
0.0242935	0.397524	CEP162	centrosomal protein 162
0.0243189	0.401612	SLC13A1	solute carrier family 13 member 1
0.0243459	0.0885331	NACAP1	nascent polypeptide associated complex alpha subunit pseudogene 1
0.0243473	0.302514	PNPLA4	patatin like phospholipase domain containing 4
0.0243891	-0.10944	GDE1	glycerophosphodiester phosphodiesterase 1
0.0243979	-0.0930036	JARID2	jumonji and AT-rich interaction domain containing 2
0.0244666	0.370096	EXOC5	exocyst complex component 5
0.0244902	0.114724	SERBP1	SERPINE1 mRNA binding protein 1
0.0245042	-0.276627	MEP1A	meprin A subunit alpha
0.0245071	-0.374179	DCAKD	dephospho-CoA kinase domain containing
0.0245134	-0.215552	G6PC3	glucose-6-phosphatase catalytic subunit 3
0.0245285	0.0876231	TMC6	transmembrane channel like 6
0.0245717	-0.325047	PIGZ	phosphatidylinositol glycan anchor biosynthesis class Z
0.0246258	-0.326672	SYNDIG1	synapse differentiation inducing 1
0.0246315	0.324288	ESR2	estrogen receptor 2
0.0246428	-0.26606	RNF186	ring finger protein 186
0.0246715	-0.312622	FGF5	fibroblast growth factor 5
0.0246802	-0.143825	IL4R	interleukin 4 receptor
0.025025	0.292931	HTR1A	5-hydroxytryptamine receptor 1A
0.0250335	0.173484	ADAM10	ADAM metallopeptidase domain 10
0.0250999	0.085765	MPC2	mitochondrial pyruvate carrier 2
0.0251939	0.107897	RHOQ	ras homolog family member Q
0.0252074	0.129969	CHD1	chromodomain helicase DNA binding protein 1
0.0252103	0.14815	MYZAP	myocardial zonula adherens protein
0.0252103	0.14815	GCOM1	GRINL1A complex locus 1
0.0252103	0.14815	POLR2M	RNA polymerase II subunit M
0.0252251	0.286338	CCL16	C-C motif chemokine ligand 16
0.0252737	-0.114034	POLR3K	RNA polymerase III subunit K
0.0252848	0.15555	S1PR5	sphingosine-1-phosphate receptor 5
0.0252991	0.325806	FGFR3	fibroblast growth factor receptor 3
0.0253144	0.250652	NEK1	NIMA related kinase 1
0.0253187	0.0861781	STK17A	serine/threonine kinase 17a
0.0253794	0.121843	SLC31A2	solute carrier family 31 member 2
0.025407	-0.265988	PPM1B	protein phosphatase, Mg2+/Mn2+ dependent 1B
0.0254108	0.0955041	COPZ1	coatomer protein complex subunit zeta 1
0.0255174	0.248746	FKBP2	FK506 binding protein 2
0.0255199	0.150688	ARGLU1	arginine and glutamate rich 1
0.0255484	0.306424	KLHL25	kelch like family member 25
0.0255622	0.19177	DYRK2	dual specificity tyrosine phosphorylation regulated kinase 2
0.0255661	-0.265803	STARD3	StAR related lipid transfer domain containing 3
0.0256261	-0.101131	TUBA1C	tubulin alpha 1c
0.025648	0.122857	SETSIP	SET-like protein
0.025648	0.122857	SET	SET nuclear proto-oncogene
0.0256566	0.0976022	ADD3	adducin 3
0.0257252	0.135262	HSPA4	heat shock protein family A (Hsp70) member 4
0.0257763	-0.238953	YME1L1	YME1 like 1 ATPase
0.0258361	0.250384	HERC2	HECT and RLD domain containing E3 ubiquitin protein ligase 2
0.0258723	0.106102	MORF4L2	mortality factor 4 like 2
0.025881	-0.191401	MIR4746	microRNA 4746
0.025881	-0.191401	UBXN6	UBX domain protein 6
0.0260246	0.30407	DGCR6L	DiGeorge syndrome critical region gene 6-like
0.0260646	0.208823	ORC4	origin recognition complex subunit 4
0.0261384	0.116183	PPM1D	protein phosphatase, Mg2+/Mn2+ dependent 1D
0.0261443	0.302015	MFSD9	major facilitator superfamily domain containing 9
0.0261462	0.210407	BMS1	BMS1, ribosome biogenesis factor
0.0261544	0.121525	TMEM39B	transmembrane protein 39B
0.0261694	0.0735358	CRKL	CRK like proto-oncogene, adaptor protein
0.0261901	0.252629	IPO5	importin 5
0.026302	-0.0900415	HDAC5	histone deacetylase 5
0.0264804	-0.423409	BCAP29	B-cell receptor-associated protein 29
0.0264964	-0.0827292	KHNYN	KH and NYN domain containing
0.02651	-0.307013	CERS4	ceramide synthase 4
0.0265362	0.453928	PEX1	peroxisomal biogenesis factor 1
0.0265491	-0.269646	PKNOX2	PBX/knotted 1 homeobox 2
0.026566	-0.116815	SORD	sorbitol dehydrogenase
0.0265857	-0.312437	KCNJ13	potassium voltage-gated channel subfamily J member 13
0.0265909	0.263416	TTC1	tetratricopeptide repeat domain 1
0.0267547	-0.188595	PTPA	protein phosphatase 2 phosphatase activator
0.0267581	-0.46161	IRF4	interferon regulatory factor 4
0.0267797	-0.418815	TUSC3	tumor suppressor candidate 3
0.0268575	0.111305	MIR1292	microRNA 1292
0.0268575	0.111305	SNORD110	small nucleolar RNA, C/D box 110
0.0268575	0.111305	SNORD86	small nucleolar RNA, C/D box 86
0.0268575	0.111305	SNORD57	small nucleolar RNA, C/D box 57
0.0268575	0.111305	NOP56	NOP56 ribonucleoprotein
0.0269314	0.134255	KLC1	kinesin light chain 1
0.0271505	0.337599	PIN1	peptidylprolyl cis/trans isomerase, NIMA-interacting 1
0.0271705	0.218383	BDKRB1	bradykinin receptor B1
0.0271789	-0.21977	ACSL6	acyl-CoA synthetase long-chain family member 6
0.0271892	-0.249941	PTPA	protein phosphatase 2 phosphatase activator
0.0272303	-0.315905	TELO2	telomere maintenance 2
0.0273004	0.0818425	SON	SON DNA binding protein
0.0273113	0.388662	GRM1	glutamate metabotropic receptor 1
0.0273398	-0.177742	MYL4	myosin light chain 4
0.0273606	-0.164371	GNL3L	G protein nucleolar 3 like
0.0274044	-0.228922	SIRT5	sirtuin 5
0.0274192	-0.215186	PTGIS	prostaglandin I2 (prostacyclin) synthase
0.0274312	0.122833	SLC35B1	solute carrier family 35 member B1
0.0274828	0.303653	LIN7C	lin-7 homolog C, crumbs cell polarity complex component
0.0274967	-0.101839	LILRB2	leukocyte immunoglobulin like receptor B2
0.0275374	-0.265404	CASQ2	calsequestrin 2
0.0275528	-0.142517	KIF2C	kinesin family member 2C
0.0276096	0.129166	ITK	IL2 inducible T-cell kinase
0.0276147	0.265081	PICALM	phosphatidylinositol binding clathrin assembly protein
0.0276712	0.288481	NRXN2	neurexin 2
0.0277502	0.365408	MTUS2	microtubule associated tumor suppressor candidate 2
0.0277728	0.116228	TPR	translocated promoter region, nuclear basket protein
0.0277961	0.111229	C1orf216	chromosome 1 open reading frame 216
0.0278225	-0.238781	LOC101930322	multidrug resistance-associated protein 6-like
0.0278225	-0.238781	ABCC6P2	ATP binding cassette subfamily C member 6 pseudogene 2
0.0278225	-0.238781	ABCC6P1	ATP binding cassette subfamily C member 6 pseudogene 1
0.0278225	-0.238781	ABCC6	ATP binding cassette subfamily C member 6
0.0278288	-0.113356	P2RX1	purinergic receptor P2X 1
0.0278731	-0.263367	RIMS2	regulating synaptic membrane exocytosis 2
0.0278915	-0.441916	SLC35F5	solute carrier family 35 member F5
0.0279143	0.303529	DLAT	dihydrolipoamide S-acetyltransferase
0.0279231	-0.135344	CD74	CD74 molecule
0.0279386	0.142008	S1PR1	sphingosine-1-phosphate receptor 1
0.0279671	0.258134	MEX3C	mex-3 RNA binding family member C
0.027968	-0.126494	BTN3A1	butyrophilin subfamily 3 member A1
0.0279701	-0.123062	CLEC7A	C-type lectin domain family 7 member A
0.0280441	0.13478	RPL23A	ribosomal protein L23a
0.0280564	0.273479	PTGER3	prostaglandin E receptor 3
0.0281067	-0.111805	CYB561	cytochrome b561
0.0281099	-0.306858	PML	promyelocytic leukemia
0.0281505	0.27094	GPR157	G protein-coupled receptor 157
0.0282011	-0.225486	DNAJA4	DnaJ heat shock protein family (Hsp40) member A4
0.0282394	-0.227368	HLCS	holocarboxylase synthetase
0.0283654	0.122466	EPRS	glutamyl-prolyl-tRNA synthetase
0.0283855	0.100228	STX16	syntaxin 16
0.0285248	0.288753	PDCD5	programmed cell death 5
0.0285348	-0.17213	SLC1A5	solute carrier family 1 member 5
0.0285513	0.196321	MRPS30	mitochondrial ribosomal protein S30
0.028584	0.155996	PAPOLA	poly(A) polymerase alpha
0.0286077	0.213822	JOSD1	Josephin domain containing 1
0.0286687	-0.411069	KRT85	keratin 85
0.028675	-0.115296	MAPK14	mitogen-activated protein kinase 14
0.0287157	-0.28539	RIMS2	regulating synaptic membrane exocytosis 2
0.0287697	-0.462942	COBLL1	cordon-bleu WH2 repeat protein like 1
0.0288443	0.105253	DIMT1	DIM1 dimethyladenosine transferase 1 homolog
0.0288867	0.262324	BBS4	Bardet-Biedl syndrome 4
0.0288953	-0.263958	PLD1	phospholipase D1
0.0289038	-0.101747	ADD1	adducin 1
0.0289122	0.312003	AP4M1	adaptor related protein complex 4 mu 1 subunit
0.028915	-0.246061	MEIS3P1	Meis homeobox 3 pseudogene 1
0.0289178	-0.27995	SV2B	synaptic vesicle glycoprotein 2B
0.0289324	-0.398642	PIR	pirin
0.02902	-0.301701	ORC1	origin recognition complex subunit 1
0.0290201	-0.133691	ARR3	arrestin 3
0.0290201	-0.243174	MECR	mitochondrial trans-2-enoyl-CoA reductase
0.0290956	-0.241736	TSSC4	tumor suppressing subtransferable candidate 4
0.0291185	-0.184482	CDA	cytidine deaminase
0.0291731	0.0841535	CELF1	CUGBP, Elav-like family member 1
0.0291895	-0.125122	SLC39A6	solute carrier family 39 member 6
0.0292014	0.206767	TMEM168	transmembrane protein 168
0.029284	-0.287723	SLC1A3	solute carrier family 1 member 3
0.0292874	-0.18495	PDCL	phosducin like
0.0292933	0.114147	CPD	carboxypeptidase D
0.0294506	0.296627	SLC17A2	solute carrier family 17 member 2
0.0294708	-0.115719	LGALS9	galectin 9
0.0295599	0.171047	YARS2	tyrosyl-tRNA synthetase 2
0.0296009	-0.174045	RET	ret proto-oncogene
0.0296523	0.312343	RWDD3	RWD domain containing 3
0.0296538	-0.269763	C9orf116	chromosome 9 open reading frame 116
0.0296794	0.158667	NRIP1	nuclear receptor interacting protein 1
0.0297342	-0.0903988	JRK	Jrk helix-turn-helix protein
0.0297498	-0.11033	LILRA6	leukocyte immunoglobulin like receptor A6
0.0298175	0.136518	CHD9	chromodomain helicase DNA binding protein 9
0.0298184	0.120099	LOC100508408	uncharacterized LOC100508408
0.0298184	0.120099	SNORD14B	small nucleolar RNA, C/D box 14B
0.0298184	0.120099	RPS13	ibosomal protein S13
0.0298239	-0.187204	CACNB1	calcium voltage-gated channel auxiliary subunit beta 1
0.0298726	-0.129774	NCF4	neutrophil cytosolic factor 4
0.0299125	0.18095	PACS2	phosphofurin acidic cluster sorting protein 2
0.0300017	0.209695	GTF2H2B	general transcription factor IIH subunit 2B (pseudogene)
0.0300264	0.274422	STXBP1	syntaxin binding protein 1
0.0300311	-0.247018	HIST1H4G	histone cluster 1, H4g
0.0301223	0.165275	ESYT1	extended synaptotagmin 1
0.0301311	0.102069	SCAMP1	secretory carrier membrane protein 1
0.0301539	0.121255	FAM13B	family with sequence similarity 13 member B
0.0302032	0.138915	POLR2B	RNA polymerase II subunit B
0.0302301	-0.381522	PTRF	polymerase I and transcript release factor
0.030245	0.182535	GAR1	GAR1 ribonucleoprotein
0.0302949	-0.300441	CA14	carbonic anhydrase 14
0.0303007	0.11364	RPL15	ribosomal protein L15
0.0303063	-0.397825	JAKMIP2	janus kinase and microtubule interacting protein 2
0.0303167	-0.101253	ACTB	actin beta
0.0303439	0.300366	GALNT12	polypeptide N-acetylgalactosaminyltransferase 12
0.0303753	-0.118427	LILRB2	leukocyte immunoglobulin like receptor B2
0.0303945	0.0939957	SLK	STE20 like kinase
0.0304591	-0.279131	ZSCAN12	zinc finger and SCAN domain containing 12
0.0305613	-0.0636733	PEX16	peroxisomal biogenesis factor 16
0.0305772	-0.289095	ATXN3	ataxin 3
0.0305901	0.397689	RNF6	ring finger protein 6
0.0306866	-0.252135	TMEM92-AS1	TMEM92 antisense RNA 1
0.030695	0.219056	ROBO3	roundabout guidance receptor 3
0.0307532	-0.227193	MEF2C	myocyte enhancer factor 2C
0.030764	0.323454	HSPA13	heat shock protein family A (Hsp70) member 13
0.0307903	-0.305231	TNNI3	troponin I3, cardiac type
0.0308443	-0.295776	ABHD8	abhydrolase domain containing 8
0.0308459	-0.120332	C8orf60	chromosome 8 open reading frame 60
0.0308697	0.39357	COL8A1	collagen type VIII alpha 1 chain
0.0308913	0.262064	ZEB2	zinc finger E-box binding homeobox 2
0.0309337	-0.271315	ZFPL1	zinc finger protein like 1
0.0309409	0.121445	ARID4B	AT-rich interaction domain 4B
0.0309409	0.121445	RBM34	RNA binding motif protein 34
0.0310692	-0.205456	HIST1H2AJ	histone cluster 1, H2aj
0.0311296	0.193874	SMARCA5	SWI/SNF related, matrix associated, actin dependent regulator of chromatin, subfamily a, member 5
0.0312829	-0.144417	TNFRSF10C	TNF receptor superfamily member 10c
0.0313049	-0.316357	IL9R	interleukin 9 receptor
0.0314118	0.104485	PCGF3	polycomb group ring finger 3
0.0314281	0.149575	PCNP	PEST proteolytic signal containing nuclear protein
0.0314429	-0.101349	MYO18A	myosin XVIIIA
0.0314429	-0.101349	TIAF1	TGFB1-induced anti-apoptotic factor 1
0.0314541	-0.219359	CYAT1	immunoglobulin lambda light chain-like
0.0314541	-0.219359	IGLV1-44	immunoglobulin lambda variable 1-44
0.0314541	-0.219359	IGLC1	immunoglobulin lambda constant 1
0.0314829	0.338486	PRR5L	proline rich 5 like
0.0314959	-0.10653	PTPN6	protein tyrosine phosphatase, non-receptor type 6
0.0315313	0.170457	LOC101928826	uncharacterized LOC101928826
0.0315313	0.170457	TPT1	tumor protein, translationally-controlled 1
0.0315644	0.0964265	MANF	mesencephalic astrocyte derived neurotrophic factor
0.0315879	0.109636	DIMT1	DIM1 dimethyladenosine transferase 1 homolog
0.0316083	-0.45636	IFI27	interferon alpha inducible protein 27
0.0316181	-0.248769	C16orf72	chromosome 16 open reading frame 72
0.0316241	-0.0918542	FLOT2	flotillin 2
0.0316286	0.0609095	PLA2G4B	phospholipase A2 group IVB
0.0316286	0.0609095	JMJD7-PLA2G4B	JMJD7-PLA2G4B readthrough
0.0317374	0.242945	ZFP64	ZFP64 zinc finger protein
0.0317596	0.285264	LOC100506639	uncharacterized LOC100506639
0.0317596	0.285264	ZNF131	zinc finger protein 131
0.0317959	-0.153163	STX7	syntaxin 7
0.0318572	0.102977	RHOH	ras homolog family member H
0.0318691	-0.307932	TNFSF18	tumor necrosis factor superfamily member 18
0.0319157	-0.0967869	RAB5A	RAB5A, member RAS oncogene family
0.0319324	0.128856	AGTPBP1	ATP/GTP binding protein 1
0.0319414	-0.266912	UBOX5	U-box domain containing 5
0.0319896	-0.162055	TSNAX-DISC1	TSNAX-DISC1 readthrough (NMD candidate)
0.0319896	-0.162055	DISC1	disrupted in schizophrenia 1
0.0320302	-0.359892	PDE3A	phosphodiesterase 3A
0.0320895	0.110085	TRBC1	T cell receptor beta constant 1
0.0321097	0.164686	EXOSC8	exosome component 8
0.032208	-0.371618	PRUNE2	prune homolog 2
0.0322145	-0.368811	TBX6	T-box 6
0.0322319	0.235357	PAM	peptidylglycine alpha-amidating monooxygenase
0.0322589	0.322365	RUFY3	RUN and FYVE domain containing 3
0.0324753	-0.0657678	FTL	ferritin light chain
0.0324846	0.120941	ZNF22	zinc finger protein 22
0.0324991	0.106629	MAN2A1	mannosidase alpha class 2A member 1
0.0325614	-0.152626	CAPN5	calpain 5
0.0326153	-0.213359	WDR41	WD repeat domain 41
0.0326525	-0.490466	ORC5	origin recognition complex subunit 5
0.0326564	0.18292	METAP2	methionyl aminopeptidase 2
0.0326691	-0.352542	ARHGEF9	Cdc42 guanine nucleotide exchange factor 9
0.0326781	-0.12928	CTSA	cathepsin A
0.0327175	0.263489	PRELID3B	PRELI domain containing 3B
0.032751	0.0800277	KLF2	Kruppel like factor 2
0.0328387	0.370447	RUFY3	RUN and FYVE domain containing 3
0.0328472	-0.254123	SERHL2	serine hydrolase-like 2
0.0328613	0.172844	DNAJC24	DnaJ heat shock protein family (Hsp40) member C24
0.0329244	-0.143268	TBC1D9	TBC1 domain family member 9
0.0329388	-0.242161	AHDC1	AT-hook DNA binding motif containing 1
0.0329882	-0.174457	KCNJ15	potassium voltage-gated channel subfamily J member 15
0.033081	-0.402765	ASCL1	achaete-scute family bHLH transcription factor 1
0.0331032	-0.124785	PARP2	poly(ADP-ribose) polymerase 2
0.03313	-0.145656	GJB3	gap junction protein beta 3
0.0331368	0.102498	NAA40	N(alpha)-acetyltransferase 40, NatD catalytic subunit
0.0331954	0.1642	PBX3	PBX homeobox 3
0.0331977	-0.357124	TRMT44	tRNA methyltransferase 44 homolog (S. cerevisiae)
0.0332352	-0.124951	ZYX	zyxin
0.0332382	-0.352746	HIST1H2BN	histone cluster 1, H2bn
0.0332702	-0.168084	SLC4A4	solute carrier family 4 member 4
0.0333128	-0.260987	LMAN1L	lectin, mannose binding 1 like
0.0333272	0.100378	CAPN2	calpain 2
0.0333464	-0.252943	DENND6B	DENN domain containing 6B
0.0333878	0.0816301	H2AFV	H2A histone family member V
0.0334107	-0.366928	BRCA1	BRCA1, DNA repair associated
0.0334898	-0.23387	PPP2R5B	protein phosphatase 2 regulatory subunit B'beta
0.0335679	-0.257857	GPR161	G protein-coupled receptor 161
0.033574	-0.118606	FANCC	Fanconi anemia complementation group C
0.0337975	-0.326635	NPR3	natriuretic peptide receptor 3
0.033834	-0.258061	MAP7	microtubule associated protein 7
0.0338439	0.113624	LDHB	lactate dehydrogenase B
0.0339028	0.148175	SUCLG2	succinate-CoA ligase GDP-forming beta subunit
0.0339269	0.299732	DLG1	discs large MAGUK scaffold protein 1
0.0339724	0.138275	RBM3	RNA binding motif (RNP1, RRM) protein 3
0.0339823	0.151387	POLDIP3	DNA polymerase delta interacting protein 3
0.0340414	-0.324917	PLAA	phospholipase A2 activating protein
0.0340718	-0.363977	SH3TC2	SH3 domain and tetratricopeptide repeats 2
0.0340776	0.20014	TARP	TCR gamma alternate reading frame protein
0.0340776	0.20014	TRGV9	T cell receptor gamma variable 9
0.0340776	0.20014	TRGC2	T cell receptor gamma constant 2
0.0340932	-0.347744	HTR1F	5-hydroxytryptamine receptor 1F
0.0341162	-0.0782694	CDK5RAP3	CDK5 regulatory subunit associated protein 3
0.0341571	-0.152782	HK3	hexokinase 3
0.0343458	-0.359063	TMEM231	transmembrane protein 231
0.0343667	0.184606	RPS6KC1	ribosomal protein S6 kinase C1
0.0343738	-0.177833	LOXL1	lysyl oxidase like 1
0.0344473	0.388403	TET1	tet methylcytosine dioxygenase 1
0.0344546	0.154968	CMPK1	cytidine/uridine monophosphate kinase 1
0.034472	0.150011	PPFIA1	PTPRF interacting protein alpha 1
0.0344752	-0.18286	DSTYK	dual serine/threonine and tyrosine protein kinase
0.0344833	0.118702	SYPL1	synaptophysin like 1
0.0345237	0.0953702	MTDH	metadherin
0.0345261	0.229878	MPHOSPH10	M-phase phosphoprotein 10
0.0345463	0.122681	CD2	CD2 molecule
0.0345537	0.250781	URB2	URB2 ribosome biogenesis 2 homolog (S. cerevisiae)
0.0346256	-0.358094	EIF4E	eukaryotic translation initiation factor 4E
0.0346287	0.368691	F13B	coagulation factor XIII B chain
0.0347681	-0.331917	LOC100506718	uncharacterized LOC100506718
0.0347681	-0.331917	FLRT2	fibronectin leucine rich transmembrane protein 2
0.0347792	0.0877749	LOC101927733	uncharacterized LOC101927733
0.0347792	0.0877749	HMGN1	high mobility group nucleosome binding domain 1
0.0348099	-0.319884	LOC101928269	uncharacterized LOC101928269
0.0348099	-0.319884	LOC100506403	uncharacterized LOC100506403
0.0348099	-0.319884	RUNX1	runt related transcription factor 1
0.0348418	0.149111	MAP3K7	mitogen-activated protein kinase kinase kinase 7
0.0349023	-0.339246	LY6G6E	lymphocyte antigen 6 complex, locus G6E
0.0350233	0.0810515	DHX16	DEAH-box helicase 16
0.0350234	-0.350653	NUP160	nucleoporin 160
0.035059	0.110106	IQGAP1	IQ motif containing GTPase activating protein 1
0.0351574	-0.104892	ACOT8	acyl-CoA thioesterase 8
0.0352046	-0.323762	TNKS	tankyrase
0.0352123	-0.309641	EPB41L4B	erythrocyte membrane protein band 4.1 like 4B
0.0352262	0.185065	BAIAP2	BAI1 associated protein 2
0.0352355	0.0780985	VKORC1	vitamin K epoxide reductase complex subunit 1
0.0352734	0.130516	C1QBP	complement C1q binding protein
0.0352741	-0.182148	GDPD5	glycerophosphodiester phosphodiesterase domain containing 5
0.0353807	-0.246915	SARDH	sarcosine dehydrogenase
0.035383	0.0764031	SEC31A	SEC31 homolog A, COPII coat complex component
0.0353977	0.108337	LDLRAP1	low density lipoprotein receptor adaptor protein 1
0.0354091	-0.459113	SKA1	spindle and kinetochore associated complex subunit 1
0.0354153	0.328009	ARHGAP26	Rho GTPase activating protein 26
0.035423	-0.343583	ATP8A2	ATPase phospholipid transporting 8A2
0.0354632	-0.323316	STX2	syntaxin 2
0.0355049	-0.261404	QPRT	quinolinate phosphoribosyltransferase
0.0355052	-0.274853	PTPRU	protein tyrosine phosphatase, receptor type U
0.0355152	-0.254244	HIST1H3F	histone cluster 1, H3f
0.0355152	-0.254244	HIST1H3B	histone cluster 1, H3b
0.0355152	-0.254244	HIST1H3H	histone cluster 1, H3h
0.0355152	-0.254244	HIST1H3J	histone cluster 1, H3j
0.0355152	-0.254244	HIST1H3G	histone cluster 1, H3g
0.0355152	-0.254244	HIST1H3I	histone cluster 1, H3i
0.0355152	-0.254244	HIST1H3E	histone cluster 1, H3e
0.0355152	-0.254244	HIST1H3C	histone cluster 1, H3c
0.0355152	-0.254244	HIST1H3D	histone cluster 1, H3d
0.0355152	-0.254244	HIST1H3A	histone cluster 1, H3a
0.0355152	-0.254244	HIST1H2AD	histone cluster 1, H2ad
0.0355312	0.119897	TRBC1	T cell receptor beta constant 1
0.0355463	-0.244869	DAAM2	dishevelled associated activator of morphogenesis 2
0.0355769	-0.299599	SRD5A2	steroid 5 alpha-reductase 2
0.0355932	-0.278325	PLAC4	placenta specific 4
0.0356022	-0.169403	HCRP1	hepatocellular carcinoma-related HCRP1
0.0356226	-0.334906	S100A7	S100 calcium binding protein A7
0.0356554	0.226909	ENOPH1	enolase-phosphatase 1
0.0356599	0.0965838	DNAJA3	DnaJ heat shock protein family (Hsp40) member A3
0.0357131	0.106222	DPAGT1	dolichyl-phosphate N-acetylglucosaminephosphotransferase 1
0.0357279	0.0923624	PPP2CB	protein phosphatase 2 catalytic subunit beta
0.035733	-0.278245	ZNF222	zinc finger protein 222
0.0357481	0.141941	CLPP	caseinolytic mitochondrial matrix peptidase proteolytic subunit
0.0357485	-0.275335	GPR17	G protein-coupled receptor 17
0.0357711	-0.280711	BRINP1	BMP/retinoic acid inducible neural specific 1
0.0358614	0.1115	NDUFB8	NADH:ubiquinone oxidoreductase subunit B8
0.0358981	0.0835689	TCF25	transcription factor 25
0.0359078	0.224525	PRELP	proline and arginine rich end leucine rich repeat protein
0.0359743	0.128984	PIGP	phosphatidylinositol glycan anchor biosynthesis class P
0.0359844	0.296978	CLEC11A	C-type lectin domain family 11 member A
0.0359932	-0.179503	IFIT2	interferon induced protein with tetratricopeptide repeats 2
0.0360047	0.271275	MBNL2	muscleblind like splicing regulator 2
0.0360331	0.396216	LOC105373738	uncharacterized LOC105373738
0.0360565	-0.415359	PTPRR	protein tyrosine phosphatase, receptor type R
0.0361206	-0.327218	RBBP9	RB binding protein 9, serine hydrolase
0.0361391	-0.247396	SRRT	serrate, RNA effector molecule
0.0361424	0.138213	SNHG4	small nucleolar RNA host gene 4
0.0361424	0.138213	MATR3	matrin 3
0.0361684	-0.119419	MLH3	mutL homolog 3
0.0361693	-0.199363	SLC6A8	solute carrier family 6 member 8
0.0361837	0.17074	PRF1	perforin 1
0.0362036	0.298021	LRIG1	leucine rich repeats and immunoglobulin like domains 1
0.0362262	0.273781	DYRK2	dual specificity tyrosine phosphorylation regulated kinase 2
0.0362349	-0.230787	IRF4	interferon regulatory factor 4
0.0362545	-0.142542	IFNAR1	interferon alpha and beta receptor subunit 1
0.0362602	-0.173547	ZNF236	zinc finger protein 236
0.0363294	-0.0886198	PRR14	proline rich 14
0.0363474	-0.343998	ATG5	autophagy related 5
0.0363688	0.307506	KCNJ4	potassium voltage-gated channel subfamily J member 4
0.0363688	0.238467	PMM1	phosphomannomutase 1
0.0364042	0.142737	CCSER2	coiled-coil serine rich protein 2
0.0364336	-0.261014	OR7A17	olfactory receptor family 7 subfamily A member 17
0.0364511	0.116843	CCNG1	cyclin G1
0.0364537	0.155461	ZNF217	zinc finger protein 217
0.0364734	-0.397677	PTPRD	protein tyrosine phosphatase, receptor type D
0.0364959	0.131128	TAX1BP1	Tax1 binding protein 1
0.0365129	0.274115	HOXD9	homeobox D9
0.0365861	-0.117594	RHBDF2	rhomboid 5 homolog 2
0.0366076	0.27312	ZNF512B	zinc finger protein 512B
0.0366448	0.238598	TIMM44	translocase of inner mitochondrial membrane 44
0.0366888	-0.234497	PLPP3	phospholipid phosphatase 3
0.0367305	0.0793926	PSMD2	proteasome 26S subunit, non-ATPase 2
0.0367656	0.125265	ARCN1	archain 1
0.0367692	0.296349	RBM10	RNA binding motif protein 10
0.036899	0.0915116	ATRX	ATRX, chromatin remodeler
0.0369077	-0.235529	PLAU	plasminogen activator, urokinase
0.0370213	-0.212704	EMX1	empty spiracles homeobox 1
0.0370488	-0.128253	KPNA6	karyopherin subunit alpha 6
0.0370495	-0.200362	TMX2-CTNND1	TMX2-CTNND1 readthrough (NMD candidate)
0.0370495	-0.200362	CTNND1	catenin delta 1
0.0370534	0.281985	PPFIA3	PTPRF interacting protein alpha 3
0.0371066	0.221868	BCAT2	branched chain amino acid transaminase 2
0.0371311	-0.141603	UNC45A	unc-45 myosin chaperone A
0.0371812	-0.10132	KDELR2	KDEL endoplasmic reticulum protein retention receptor 2
0.0372073	-0.149703	CTNNA1	catenin alpha 1
0.0372364	-0.112923	KLF3	Kruppel like factor 3
0.0372419	-0.260583	RNF39	ring finger protein 39
0.0372713	-0.130987	UBE2J1	ubiquitin conjugating enzyme E2 J1
0.03728	-0.294063	LILRA5	leukocyte immunoglobulin like receptor A5
0.0375371	0.111832	ADH5	alcohol dehydrogenase 5 (class III), chi polypeptide
0.0375442	-0.0842489	HLA-E	major histocompatibility complex, class I, E
0.0376426	0.352907	SYCE1L	synaptonemal complex central element protein 1 like
0.0376744	0.155976	FYCO1	FYVE and coiled-coil domain containing 1
0.037701	-0.44386	LAMA2	laminin subunit alpha 2
0.0377279	-0.111422	PARP12	poly(ADP-ribose) polymerase family member 12
0.0378081	0.0947857	SCAF11	SR-related CTD associated factor 11
0.0378109	-0.127829	IFITM3	interferon induced transmembrane protein 3
0.0378251	-0.289655	HBP1	HMG-box transcription factor 1
0.037897	0.217526	MLC1	megalencephalic leukoencephalopathy with subcortical cysts 1
0.0379016	-0.236402	GRIA3	glutamate ionotropic receptor AMPA type subunit 3
0.0379166	0.225516	EVC	EvC ciliary complex subunit 1
0.0379697	0.324035	PDE4DIP	phosphodiesterase 4D interacting protein
0.0380158	-0.271412	PROSC	proline synthetase cotranscribed homolog (bacterial)
0.038036	0.10035	SNX5	sorting nexin 5
0.0381459	-0.124884	SLC2A1	solute carrier family 2 member 1
0.0381644	-0.303515	ZNF117	zinc finger protein 117
0.0381653	0.104753	SEC31A	SEC31 homolog A, COPII coat complex component
0.0383556	-0.301781	GFM1	G elongation factor mitochondrial 1
0.0383837	0.185731	PREP	prolyl endopeptidase
0.0384284	-0.349446	TP53AIP1	tumor protein p53 regulated apoptosis inducing protein 1
0.0384287	0.0587507	CHFR	checkpoint with forkhead and ring finger domains, E3 ubiquitin protein ligase
0.0384342	-0.424043	KIF18A	kinesin family member 18A
0.0384616	0.09218	TRAPPC8	trafficking protein particle complex 8
0.0384805	0.08645	SHC1	SHC adaptor protein 1
0.0384894	0.155711	ABLIM1	actin binding LIM protein 1
0.0385386	0.235143	PODXL	podocalyxin like
0.0385566	0.0994642	EXOC1	exocyst complex component 1
0.0385933	0.108335	LAT	linker for activation of T-cells
0.0386397	0.168991	HIST1H2BC	histone cluster 1, H2bc
0.0386397	0.168991	HIST1H2BI	histone cluster 1, H2bi
0.0386397	0.168991	HIST1H2BE	histone cluster 1, H2be
0.0386397	0.168991	HIST1H2BF	histone cluster 1, H2bf
0.0386397	0.168991	HIST1H2BG	histone cluster 1, H2bg
0.0386414	0.168009	ALDH4A1	aldehyde dehydrogenase 4 family member A1
0.0386639	0.0941778	TBC1D15	TBC1 domain family member 15
0.0386947	-0.327743	ERBB4	erb-b2 receptor tyrosine kinase 4
0.0387151	-0.215315	SKP2	S-phase kinase-associated protein 2, E3 ubiquitin protein ligase
0.0387168	0.107882	CASP8	caspase 8
0.0388765	0.123354	ANP32E	acidic nuclear phosphoprotein 32 family member E
0.0388864	0.113572	HIPK1	homeodomain interacting protein kinase 1
0.0390233	-0.163932	HHIPL2	HHIP like 2
0.0390498	-0.288028	OBSL1	obscurin like 1
0.0391089	0.151826	SUPT6H	SPT6 homolog, histone chaperone
0.0391359	-0.329737	PGAP1	post-GPI attachment to proteins 1
0.0392677	0.090888	SYF2	SYF2 pre-mRNA splicing factor
0.0392726	-0.32425	HSPB7	heat shock protein family B (small) member 7
0.0392732	-0.265903	CCHCR1	coiled-coil alpha-helical rod protein 1
0.039341	-0.232503	CA4	carbonic anhydrase 4
0.0393973	-0.315629	FOXG1	forkhead box G1
0.0394387	0.253125	RNASE4	ribonuclease A family member 4
0.0394919	0.191404	RPS29	ribosomal protein S29
0.0395154	0.103925	PLIN2	perilipin 2
0.039556	0.231378	HMGCS1	3-hydroxy-3-methylglutaryl-CoA synthase 1
0.0395793	-0.219973	CNTN1	contactin 1
0.0396176	0.21983	TBC1D22A	TBC1 domain family member 22A
0.0396292	0.143219	CAPZA2	capping actin protein of muscle Z-line alpha subunit 2
0.0396354	0.107329	DENND2D	DENN domain containing 2D
0.0396531	-0.274271	TRMT2A	tRNA methyltransferase 2 homolog A
0.0396533	-0.163268	DTX4	deltex E3 ubiquitin ligase 4
0.0396544	0.140934	THUMPD2	THUMP domain containing 2
0.0396827	0.157145	UBA2	ubiquitin like modifier activating enzyme 2
0.0397128	0.134086	KCTD12	potassium channel tetramerization domain containing 12
0.0397849	-0.297175	LOC101928278	uncharacterized LOC101928278
0.0398347	-0.192415	LMOD1	leiomodin 1
0.0398887	0.323869	ZNF559-ZNF177	ZNF559-ZNF177 readthrough
0.0398887	0.323869	ZNF177	zinc finger protein 177
0.0399087	-0.297547	MT1M	metallothionein 1M
0.0399366	0.0834045	RHOF	ras homolog family member F, filopodia associated
0.0399434	-0.296062	CST5	cystatin D
0.0399461	0.154451	FLNB	filamin B
0.040014	0.158249	ACAT1	acetyl-CoA acetyltransferase 1
0.0400231	-0.163516	TEC	tec protein tyrosine kinase
0.0400882	0.0828446	USP14	ubiquitin specific peptidase 14
0.0400905	0.0824195	TTC17	tetratricopeptide repeat domain 17
0.0402155	0.111114	ARIH2	ariadne RBR E3 ubiquitin protein ligase 2
0.0402232	-0.0749842	CLN3	CLN3, battenin
0.04024	-0.365457	ITGA2B	integrin subunit alpha 2b
0.0402663	0.103016	MAP4	microtubule associated protein 4
0.0402962	-0.249964	C22orf31	chromosome 22 open reading frame 31
0.0403046	0.0918359	TMX4	thioredoxin related transmembrane protein 4
0.040329	-0.349302	NT5M	5',3'-nucleotidase, mitochondrial
0.0403946	-0.292891	MXRA5	matrix remodeling associated 5
0.0404085	-0.338057	KDELR3	KDEL endoplasmic reticulum protein retention receptor 3
0.0404305	0.34143	ELK4	ELK4, ETS transcription factor
0.0405184	-0.289411	DCT	dopachrome tautomerase
0.0405311	-0.181902	PBX2	PBX homeobox 2
0.0405615	0.292697	TMEM259	transmembrane protein 259
0.0406023	0.173858	VARS	valyl-tRNA synthetase
0.0406153	-0.153436	STAT1	signal transducer and activator of transcription 1
0.0406799	-0.305295	P3H2	prolyl 3-hydroxylase 2
0.040696	-0.317431	ZWILCH	zwilch kinetochore protein
0.0407751	-0.234588	DHPS	deoxyhypusine synthase
0.0408022	-0.345805	GRIA1	glutamate ionotropic receptor AMPA type subunit 1
0.0408513	0.1397	UBE2G1	ubiquitin conjugating enzyme E2 G1
0.0410173	-0.222929	RECQL5	RecQ like helicase 5
0.041071	0.28704	PRSS23	protease, serine 23
0.0411252	-0.130227	LOC101929368	uncharacterized LOC101929368
0.0411252	-0.130227	FKBP1A	FK506 binding protein 1A
0.0411545	0.230124	IQCC	IQ motif containing C
0.0412493	0.102382	DEGS1	delta 4-desaturase, sphingolipid 1
0.041262	0.093411	XPO6	exportin 6
0.0413345	0.145443	LGALS8	galectin 8
0.0413464	0.103945	RNF139	ring finger protein 139
0.0413502	-0.340575	ZNF41	zinc finger protein 41
0.0413509	0.107055	IPO5	importin 5
0.0413538	0.148185	GPR171	G protein-coupled receptor 171
0.0413647	0.0959617	SH3BGRL	SH3 domain binding glutamate rich protein like
0.0414237	-0.271153	SLC45A2	solute carrier family 45 member 2
0.0414669	-0.324852	NF2	neurofibromin 2
0.0415079	-0.291034	WARS2	tryptophanyl tRNA synthetase 2, mitochondrial
0.0415113	0.243206	DVL3	dishevelled segment polarity protein 3
0.0415752	0.149348	PAIP1	poly(A) binding protein interacting protein 1
0.0416339	-0.464208	CLCA3P	chloride channel accessory 3, pseudogene
0.0416384	-0.266257	SMR3B	submaxillary gland androgen regulated protein 3B
0.0416398	-0.207023	COG4	component of oligomeric golgi complex 4
0.0416523	-0.181919	MIR3190	microRNA 3190
0.0416523	-0.181919	MIR3191	microRNA 3191
0.0416523	-0.181919	BBC3	BCL2 binding component 3
0.0416693	-0.0955316	RUBCN	RUN and cysteine rich domain containing beclin 1 interacting protein
0.041756	-0.314911	NOVA1	NOVA alternative splicing regulator 1
0.0417912	-0.269663	PLGLB1	plasminogen-like B1
0.0417912	-0.269663	PLGLB2	plasminogen-like B2
0.0418173	-0.345892	LOC100506558	uncharacterized LOC100506558
0.0418173	-0.345892	MATN2	matrilin 2
0.0418182	0.156092	ZBTB11	zinc finger and BTB domain containing 11
0.0418403	-0.198012	FER1L4	fer-1 like family member 4, pseudogene
0.0418503	-0.198644	TEP1	telomerase associated protein 1
0.0419352	-0.118583	PARVB	parvin beta
0.0419399	0.106726	TNFRSF10B	TNF receptor superfamily member 10b
0.0420361	-0.224724	SLC7A1	solute carrier family 7 member 1
0.0421085	-0.16963	ERVH-4	endogenous retrovirus group H member 4
0.04214	-0.154008	CD79A	CD79a molecule
0.0421468	-0.27423	ZNF3	zinc finger protein 3
0.0422306	0.144032	TBP	TATA-box binding protein
0.0422441	0.130104	RASGRP1	RAS guanyl releasing protein 1
0.0424169	-0.350221	SMPX	small muscle protein, X-linked
0.0424187	0.144123	GPR183	G protein-coupled receptor 183
0.0424385	0.110888	PIGB	phosphatidylinositol glycan anchor biosynthesis class B
0.0424731	0.295665	CKAP2	cytoskeleton associated protein 2
0.0424731	0.295665	IGLC1	immunoglobulin lambda constant 1
0.0424875	0.0931037	RLIM///PABPC1	ring finger protein, LIM domain interacting///poly(A) binding protein cytoplasmic 1
0.0425298	-0.263589	TAB1	TGF-beta activated kinase 1 (MAP3K7) binding protein 1
0.0425707	0.183705	IL18RAP	interleukin 18 receptor accessory protein
0.0425722	0.0758944	EIF4G2	eukaryotic translation initiation factor 4 gamma 2
0.0426188	-0.134247	HCRT	hypocretin neuropeptide precursor
0.0427065	0.0946912	NDRG3	NDRG family member 3
0.0427378	-0.393873	MTHFD2L	methylenetetrahydrofolate dehydrogenase (NADP+ dependent) 2-like
0.042755	-0.316028	LOC102725526	uncharacterized LOC102725526
0.042755	-0.316028	IGHV4-31	immunoglobulin heavy variable 4-31
0.042755	-0.316028	IGHM	immunoglobulin heavy constant mu
0.042755	-0.316028	IGHG3	immunoglobulin heavy constant gamma 3 (G3m marker)
0.042755	-0.316028	IGHG2	immunoglobulin heavy constant gamma 2 (G2m marker)
0.042755	-0.316028	IGHG1	immunoglobulin heavy constant gamma 1 (G1m marker)
0.042755	-0.316028	IGHA2	immunoglobulin heavy constant alpha 2 (A2m marker)
0.042755	-0.316028	IGHA1	immunoglobulin heavy constant alpha 1
0.042755	-0.316028	IGH	immunoglobulin heavy locus
0.0428033	0.153123	LTN1	listerin E3 ubiquitin protein ligase 1
0.0428046	0.277502	GP2	glycoprotein 2
0.0428444	0.231163	ELP4	elongator acetyltransferase complex subunit 4
0.0428725	-0.134728	TFB2M	transcription factor B2, mitochondrial
0.0428888	0.157822	TBC1D9	TBC1 domain family member 9
0.042913	0.169322	COX11	COX11, cytochrome c oxidase copper chaperone
0.0429225	0.121327	PKN2	protein kinase N2
0.0429754	-0.0819802	TNIP1	TNFAIP3 interacting protein 1
0.0429862	-0.145299	CTSD	cathepsin D
0.0430015	-0.193226	VAMP5	vesicle associated membrane protein 5
0.0430556	-0.312056	CDC6	cell division cycle 6
0.0430953	-0.309612	GABRA2	gamma-aminobutyric acid type A receptor alpha2 subunit
0.0431812	-0.281089	CDK18	cyclin dependent kinase 18
0.0432089	-0.278102	NRIP2	nuclear receptor interacting protein 2
0.0432119	-0.111847	VAMP2	vesicle associated membrane protein 2
0.0433575	0.103934	RPA3	replication protein A3
0.0433822	0.155123	PTBP3	polypyrimidine tract binding protein 3
0.0434076	0.207296	NPDC1	neural proliferation, differentiation and control 1
0.0434798	-0.26318	CCL7	C-C motif chemokine ligand 7
0.0435127	-0.119359	PRKDC	protein kinase, DNA-activated, catalytic polypeptide
0.0435936	-0.0885526	SAP25///LRCH4	Sin3A associated protein 25///leucine rich repeats and calponin homology domain containing 4
0.0436133	-0.234578	CLN8	ceroid-lipofuscinosis, neuronal 8
0.0436331	-0.290677	KLK3	kallikrein related peptidase 3
0.0436377	-0.247601	CDKN2A	cyclin dependent kinase inhibitor 2A
0.0436701	-0.132935	BTN2A1	butyrophilin subfamily 2 member A1
0.0436774	-0.272432	OPCML	opioid binding protein/cell adhesion molecule like
0.0438311	-0.24065	NF1P9	neurofibromin 1 pseudogene 9
0.0438311	-0.24065	NF1	neurofibromin 1
0.0438508	-0.313406	MLANA	melan-A
0.0438585	0.117953	IDH3B	isocitrate dehydrogenase 3 (NAD(+)) beta
0.0439236	-0.158297	SLPI	secretory leukocyte peptidase inhibitor
0.0439295	0.123381	UBE2V2	ubiquitin conjugating enzyme E2 V2
0.0439675	0.208223	ERP44	endoplasmic reticulum protein 44
0.0440641	-0.190301	HAL	histidine ammonia-lyase
0.0440757	-0.362077	GAS2	growth arrest specific 2
0.0442782	-0.376092	ZNF254	zinc finger protein 254
0.0442851	-0.283282	SULT1C2	sulfotransferase family 1C member 2
0.044301	0.0754768	ATP5SL	ATP5S like
0.0443433	0.262713	TMEM92-AS1	TMEM92 antisense RNA 1
0.0444586	-0.142943	MBOAT2	membrane bound O-acyltransferase domain containing 2
0.0446473	-0.178795	TRAPPC3	trafficking protein particle complex 3
0.0446779	-0.221001	MAP3K12	mitogen-activated protein kinase kinase kinase 12
0.0447077	-0.123968	MLPH	melanophilin
0.0447167	0.0987562	PSMG2	proteasome assembly chaperone 2
0.0447407	-0.138593	WTAP	Wilms tumor 1 associated protein
0.0447955	0.276794	RASAL1	RAS protein activator like 1
0.044819	0.266093	MGA	MGA, MAX dimerization protein
0.0448443	-0.13116	LILRB4	leukocyte immunoglobulin like receptor B4
0.0448898	0.110235	KDM4C	lysine demethylase 4C
0.044947	0.123282	RRP1B	ribosomal RNA processing 1B
0.0449573	0.138473	ABCE1	ATP binding cassette subfamily E member 1
0.0449704	0.080088	HNRNPA3	heterogeneous nuclear ribonucleoprotein A3
0.0449704	0.080088	HNRNPA3P1	heterogeneous nuclear ribonucleoprotein A3 pseudogene 1
0.0449765	0.123969	C11orf58	chromosome 11 open reading frame 58
0.0449981	0.0999494	PTP4A2	protein tyrosine phosphatase type IVA, member 2
0.0450056	-0.204008	ELK1	ELK1, ETS transcription factor
0.0450316	-0.227607	CETP	cholesteryl ester transfer protein
0.045066	-0.0896031	SNW1	SNW domain containing 1
0.045074	-0.315106	BUB1	BUB1 mitotic checkpoint serine/threonine kinase
0.04512	0.153365	PMS2P3	PMS1 homolog 2, mismatch repair system component pseudogene 3
0.0451269	0.095446	SNRPB	small nuclear ribonucleoprotein polypeptides B and B1
0.0451492	-0.188861	LINC01314	long intergenic non-protein coding RNA 1314
0.0451872	0.428459	FOLR3	folate receptor 3
0.0452203	0.40702	MS4A3	membrane spanning 4-domains A3
0.0452208	0.111787	DUT	deoxyuridine triphosphatase
0.0452231	-0.104835	PEA15	phosphoprotein enriched in astrocytes 15
0.0452385	-0.192335	GFAP	glial fibrillary acidic protein
0.0452528	-0.203768	LOC101929726	uncharacterized LOC101929726
0.0452721	-0.112577	YIPF3	Yip1 domain family member 3
0.0452994	-0.254294	SLC35A3	solute carrier family 35 member A3
0.0453109	-0.316473	TNC	tenascin C
0.04539	0.377622	TTC3P1	tetratricopeptide repeat domain 3 pseudogene 1
0.04539	0.377622	TTC3	tetratricopeptide repeat domain 3
0.0454105	-0.104889	ZNF692	zinc finger protein 692
0.0454476	0.299159	MTAP	methylthioadenosine phosphorylase
0.0454784	0.266626	TGM4	transglutaminase 4
0.0454968	-0.348567	ABCD2	ATP binding cassette subfamily D member 2
0.0456272	0.0863657	RBM14-RBM4///RBM4	RBM14-RBM4 readthrough///RNA binding motif protein 4
0.0456494	0.111396	PA2G4	proliferation-associated 2G4
0.0456885	0.107479	TIMM23B///TIMM23	translocase of inner mitochondrial membrane 23 homolog B///translocase of inner mitochondrial membrane 23
0.0457047	-0.459954	AFAP1	actin filament associated protein 1
0.0457118	0.178494	ZNHIT3	zinc finger HIT-type containing 3
0.0457283	-0.336039	MGAT4C	MGAT4 family member C
0.0457474	-0.296318	ANKRD6	ankyrin repeat domain 6
0.0457782	0.104626	ZNF544	zinc finger protein 544
0.0458543	0.317567	ZNF10	zinc finger protein 10
0.0458993	-0.0964119	GRHPR	glyoxylate and hydroxypyruvate reductase
0.0459654	0.114754	PTPRA	protein tyrosine phosphatase, receptor type A
0.0459657	0.24549	NGDN	neuroguidin
0.0460662	0.0973645	WIPF2	WAS/WASL interacting protein family member 2
0.0461009	-0.246411	VEGFA	vascular endothelial growth factor A
0.0461163	-0.330761	RHD	Rh blood group D antigen
0.0461554	0.143473	ETV6	ETS variant 6
0.0461573	-0.374365	FAM149B1	family with sequence similarity 149 member B1
0.0461769	0.279304	LIPE	lipase E, hormone sensitive type
0.0461926	0.146023	ATM	ATM serine/threonine kinase
0.0462212	0.129234	MPZL1	myelin protein zero like 1
0.0463804	0.149095	CACTIN	cactin, spliceosome C complex subunit
0.0464178	-0.179885	EGR4	early growth response 4
0.0464515	-0.259062	EPPK1	epiplakin 1
0.0465404	0.124605	RNASET2	ribonuclease T2
0.0465668	0.163513	SYNJ1	synaptojanin 1
0.0465999	-0.0804431	LST1	leukocyte specific transcript 1
0.0466367	-0.266289	KCNA4	potassium voltage-gated channel subfamily A member 4
0.0467105	-0.0810405	MIR5193///UBA7	microRNA 5193///ubiquitin like modifier activating enzyme 7
0.0467299	-0.250007	RAB11FIP3	RAB11 family interacting protein 3
0.0467304	-0.1417	HNRNPUL1	heterogeneous nuclear ribonucleoprotein U like 1
0.0467409	0.175846	KANSL2	KAT8 regulatory NSL complex subunit 2
0.046772	-0.112972	CD84	CD84 molecule
0.0468289	-0.187671	LRP1	LDL receptor related protein 1
0.0468348	0.25792	FAM134B	family with sequence similarity 134 member B
0.0469023	0.145061	RPL10A	ribosomal protein L10a
0.0470185	0.118815	HNRNPA1P33///HNRNPA1P10///HNRNPA1L2///HNRNPA1	heterogeneous nuclear ribonucleoprotein A1 pseudogene 33///heterogeneous nuclear ribonucleoprotein A1 pseudogene 10///heterogeneous nuclear ribonucleoprotein A1-like 2///heterogeneous nuclear ribonucleoprotein A1
0.047055	-0.125299	FMNL1	formin like 1
0.0472004	0.106963	ATXN1	ataxin 1
0.0472262	0.119817	FKBP11	FK506 binding protein 11
0.0472896	-0.285118	CYR61	cysteine rich angiogenic inducer 61
0.0472974	-0.370061	RGS12	regulator of G-protein signaling 12
0.0473546	-0.314396	FAM86C1	family with sequence similarity 86 member C1
0.0473727	-0.341713	EPHA2	EPH receptor A2
0.0473821	0.102086	EIF3M	eukaryotic translation initiation factor 3 subunit M
0.0474059	0.220642	ID3	inhibitor of DNA binding 3, HLH protein
0.0474129	-0.0941358	BRF2	BRF2, RNA polymerase III transcription initiation factor 50 kDa subunit
0.0474307	0.0952931	NDUFAB1	NADH:ubiquinone oxidoreductase subunit AB1
0.0474842	-0.1489	ALCAM	activated leukocyte cell adhesion molecule
0.0475448	-0.144725	GTDC1	glycosyltransferase like domain containing 1
0.0475513	-0.220565	PTPRF	protein tyrosine phosphatase, receptor type F
0.0475837	-0.393505	KCNJ13	potassium voltage-gated channel subfamily J member 13
0.0475873	0.125873	TAF4	TATA-box binding protein associated factor 4
0.0476139	-0.344525	CKM	creatine kinase, M-type
0.0476446	0.0922578	CYTIP	cytohesin 1 interacting protein
0.0476571	0.243271	TROVE2	TROVE domain family member 2
0.0476663	0.295812	LZTFL1	leucine zipper transcription factor like 1
0.0476894	0.258351	PRLR	prolactin receptor
0.0478078	0.0884132	WDR1	WD repeat domain 1
0.0478165	0.331148	RRN3	RRN3 homolog, RNA polymerase I transcription factor
0.0478569	0.111751	USP9X	ubiquitin specific peptidase 9, X-linked
0.0478808	0.0902433	KXD1	KxDL motif containing 1
0.0478953	-0.31092	ABCA6	ATP binding cassette subfamily A member 6
0.048023	0.258359	SART3	squamous cell carcinoma antigen recognized by T-cells 3
0.0480329	0.125779	ZC3H15	zinc finger CCCH-type containing 15
0.0480938	-0.0857254	AGPAT1	1-acylglycerol-3-phosphate O-acyltransferase 1
0.0481152	0.130044	SMURF2	SMAD specific E3 ubiquitin protein ligase 2
0.0481395	0.133299	PATZ1	POZ/BTB and AT hook containing zinc finger 1
0.0481477	0.173773	PRDM4	PR/SET domain 4
0.0481576	-0.18758	ROM1	retinal outer segment membrane protein 1
0.0481635	0.296852	POLR2K	RNA polymerase II subunit K
0.0481822	-0.21496	WASF3	WAS protein family member 3
0.0482416	-0.313085	SSX4B///SSX4	SSX family member 4B///SSX family member 4
0.048262	-0.397752	IFIH1	interferon induced with helicase C domain 1
0.0482759	0.10842	SERP1	stress-associated endoplasmic reticulum protein 1
0.0483084	-0.312464	ALB	albumin
0.0483638	0.296081	FOXB1	forkhead box B1
0.0484035	-0.225342	LINC00950	long intergenic non-protein coding RNA 950
0.0484131	0.191634	TRAT1	T cell receptor associated transmembrane adaptor 1
0.0484964	-0.165026	FOXL1	forkhead box L1
0.0486642	-0.242871	SIRT6	sirtuin 6
0.0486821	-0.332084	ITGB8	integrin subunit beta 8
0.0487975	-0.121601	PKM	pyruvate kinase, muscle
0.0488781	-0.150667	TBC1D2B	TBC1 domain family member 2B
0.0489102	-0.356957	GULP1	GULP, engulfment adaptor PTB domain containing 1
0.0489651	0.090269	IQGAP2	IQ motif containing GTPase activating protein 2
0.0489786	-0.241398	CD300A	CD300a molecule
0.0490047	-0.0950672	SULT1A2	sulfotransferase family 1A member 2
0.049012	-0.318664	POP1	POP1 homolog, ribonuclease P/MRP subunit
0.0490652	0.279485	GIN1	gypsy retrotransposon integrase 1
0.0490875	0.237133	OSMR	oncostatin M receptor
0.0490952	-0.168686	NOTCH2	notch 2
0.0491029	0.143601	ELK3	ELK3, ETS transcription factor
0.0493118	0.0826714	NDUFB6	NADH:ubiquinone oxidoreductase subunit B6
0.0493685	-0.131412	DENND3	DENN domain containing 3
0.0494129	-0.068468	STAT5A	signal transducer and activator of transcription 5A
0.0494586	-0.276397	BEAN1	brain expressed, associated with NEDD4, 1
0.0495413	-0.212072	PPP1R2P9	protein phosphatase 1 regulatory inhibitor subunit 2 pseudogene 9
0.0495538	0.11574	G3BP2	G3BP stress granule assembly factor 2
0.0495577	-0.167536	VCAN	versican
0.0496028	-0.348877	LOC100507472///PCSK6	uncharacterized LOC100507472///proprotein convertase subtilisin/kexin type 6
0.049651	-0.245318	ISG15	ISG15 ubiquitin-like modifier
0.0496741	-0.301873	WWOX	WW domain containing oxidoreductase
0.0496888	0.273136	LHX1	LIM homeobox 1
0.0497412	0.168205	EPS15L1	epidermal growth factor receptor pathway substrate 15 like 1
0.0497648	-0.29584	ATP8A1	ATPase phospholipid transporting 8A1
0.0497678	0.0992805	SRPK2	SRSF protein kinase 2
0.0498015	-0.201705	TNFAIP6	TNF alpha induced protein 6
0.0498181	0.348374	SNTB1	syntrophin beta 1
0.0498439	-0.115066	OTUD4	OTU deubiquitinase 4
0.049851	0.185408	SSPN	sarcospan
0.0498876	0.176837	CASP6	caspase 6
0.0499058	-0.159595	RFC3	replication factor C subunit 3
0.0499193	0.124865	DDIT4	DNA damage inducible transcript 4
0.0499425	0.136321	PTP4A3	protein tyrosine phosphatase type IVA, member 3
0.0499506	-0.361277	SMIM14	small integral membrane protein 14
0.0499946	0.179861	AKIRIN1	akirin 1

## Sheet: Table S4
Table S4 177 CHD targets were selected from Genecard, Disgenet, Drugbank, OMIM gene database and GSE12288 database
Number	Gene name	Uniprot ID	Protein name	Database
1	CYP2C9	P11712	cytochrome P450 family 2 subfamily C member 9	Genecard/Drugbank
2	CYP1A2	P05177	cytochrome P450 family 1 subfamily A member 2	Genecard/Drugbank
3	CYP3A4	P08684	cytochrome P450 family 3 subfamily A member 4	Genecard/Drugbank
4	CYP1A1	P04798	cytochrome P450 family 1 subfamily A member 1	Genecard/Drugbank
5	CYP2B6	P20813	Cytochrome P450 2B6	Genecard/Drugbank
6	HDAC2	Q92769	Histone deacetylase 2	Genecard/Drugbank
7	ITGAL	P20701	Integrin alpha-L	Genecard/Drugbank
8	PON3	Q15166	Serum paraoxonase/lactonase 3	Genecard/Drugbank
9	ABCG2	Q9UNQ0	ATP binding cassette subfamily G member 2	Genecard/Drugbank
10	APOE	P02649	Apolipoprotein E	Genecard/Disgenet
11	APOB	P04114	Apolipoprotein B-100	Genecard/Disgenet
12	LDLR	P01130	Low-density lipoprotein receptor	Genecard/Disgenet
13	PLA2G7	Q13093	Platelet-activating factor acetylhydrolase	Genecard/Disgenet
14	HNF1A	P20823	Hepatocyte nuclear factor 1-alpha	Genecard/Disgenet
15	TCF7L2	Q9NQB0	Transcription factor 7-like 2	Genecard/Disgenet
16	ABCG5	Q9H222	ATP-binding cassette sub-family G member 5	Genecard/Disgenet
17	ACE	P12821	Angiotensin-converting enzyme	Genecard/Disgenet
18	LPL	P06858	Lipoprotein lipase	Genecard/Disgenet
19	MMP3	P08254	matrix metallopeptidase 3	Genecard/Disgenet
20	VKORC1	Q9BQB6	Vitamin K epoxide reductase complex subunit 1	Genecard/Disgenet
21	CCDC92	Q53HC0	Coiled-coil domain-containing protein 92	Genecard/Disgenet
22	PLAU	P00749	plasminogen activator, urokinase	Genecard/Disgenet
23	ESR2	Q92731	Estrogen receptor beta	Genecard/Disgenet
24	MMP9	P14780	matrix metallopeptidase 9	Genecard/Disgenet
25	CCL2	P13500	C-C motif chemokine 2	Genecard/Disgenet
26	EDN1	P05305	Endothelin-1	Genecard/Disgenet
27	CCR5	P51681	C-C chemokine receptor type 5	Genecard/Disgenet
28	CD40LG	P29965	CD40 ligand	Genecard/Disgenet
29	MIF	P14174	Macrophage migration inhibitory factor	Genecard/Disgenet
30	CETP	P11597	Cholesteryl ester transfer protein	Genecard/Disgenet
31	PHACTR1	Q9C0D0	Phosphatase and actin regulator 1	Genecard/Disgenet
32	ALDH2	P05091	Aldehyde dehydrogenase, mitochondrial	Genecard/Disgenet
33	LIPC	P11150	Hepatic triacylglycerol lipase	Genecard/Disgenet
34	ABO	P16442	Histo-blood group ABO system transferase	Genecard/Disgenet
35	LOX	P28300	Protein-lysine 6-oxidase, EC 1.4.3.13	Genecard/Disgenet
36	TCF21	O43680	Transcription factor 21	Genecard/Disgenet
37	ALOX5	P12527	arachidonate 5-lipoxygenase	Genecard/Disgenet
38	IL6R	P08887	Interleukin-6 receptor subunit alpha	Genecard/Disgenet
39	ADAMTS7	Q9UKP4	A disintegrin and metalloproteinase with thrombospondin motifs 7	Genecard/Disgenet
40	SCARB1	Q8WTV0	Scavenger receptor class B member 1	Genecard/Disgenet
41	PECAM1	P16284	Platelet endothelial cell adhesion molecule	Genecard/Disgenet
42	LIPA	P38571	Lysosomal acid lipase/cholesteryl ester hydrolase, Acid cholesteryl ester hydrolase, LAL	Genecard/Disgenet
43	LPAL2	Q16609	Putative apolipoprotein(a)-like protein 2	Genecard/Disgenet
44	MIA3	Q5JRA6	Transport and Golgi organization protein 1 homolog	Genecard/Disgenet
45	COL4A2	P08572	Collagen alpha-2(IV) chain	Genecard/Disgenet
46	FADS2	O95864	Acyl-CoA 6-desaturase	Genecard/Disgenet
47	NR1H3	Q13133	Oxysterols receptor LXR-alpha	Genecard/Disgenet
48	ZPR1	O75312	Zinc finger protein ZPR1	Genecard/Disgenet
49	SMAD3	P84022	SMAD family member 3	Genecard/Disgenet
50	AR	P10275	androgen receptor	Genecard/Disgenet
51	ADTRP	Q96IZ2	Androgen-dependent TFPI-regulating protein	Genecard/Disgenet
52	FTO	Q9C0B1	Alpha-ketoglutarate-dependent dioxygenase FTO	Genecard/Disgenet
53	GCKR	Q14397	Glucokinase regulatory protein	Genecard/Disgenet
54	BRAP	Q7Z569	BRCA1-associated protein, EC 2.3.2.27	Genecard/Disgenet
55	PROCR	Q9UNN8	Endothelial protein C receptor	Genecard/Disgenet
56	GALNT2	Q10471	Polypeptide N-acetylgalactosaminyltransferase 2	Genecard/Disgenet
57	ZFHX3	Q15911	Zinc finger homeobox protein 3	Genecard/Disgenet
58	ATP2B1	P20020	Plasma membrane calcium-transporting ATPase 1	Genecard/Disgenet
59	FLT1	P17948	Vascular endothelial growth factor receptor 1, VEGFR-1	Genecard/Disgenet
60	ANKS1A	Q92625	Ankyrin repeat and SAM domain-containing protein 1A	Genecard/Disgenet
61	CRP	P02741	C-reactive protein	Genecard/Disgenet
62	ADIPOQ	Q15848	Adiponectin	Genecard/Disgenet
63	APOA1	P02647	Apolipoprotein A-I	Genecard/Disgenet
64	TNF	P01375	Tumor necrosis factor	Genecard/Disgenet
65	AGT	P01019	Angiotensinogen	Genecard/Disgenet
66	VEGFA	P15692	Vascular endothelial growth factor A	Genecard/Disgenet
67	SERPINE1	P05121	Plasminogen activator inhibitor 1	Genecard/Disgenet
68	REN	P00797	Renin	Genecard/Disgenet
69	APOC3	P02656	Apolipoprotein C-III	Genecard/Disgenet
70	PPARG	P37231	Peroxisome proliferator activated receptor gamma	Genecard/Disgenet
71	AGTR1	P30556	Type-1 angiotensin II receptor	Genecard/Disgenet
72	CYBA	P13498	Cytochrome b-245 light chain	Genecard/Disgenet
73	ESR1	P03372	Estrogen receptor	Genecard/Disgenet
74	MPO	P05164	myeloperoxidase	Genecard/Disgenet
75	CD14	P08571	Monocyte differentiation antigen CD14	Genecard/Disgenet
76	HP	P00738	Haptoglobin	Genecard/Disgenet
77	AGER	Q15109	Advanced glycosylation end product-specific receptor	Genecard/Disgenet
78	GSTM1	P09488	Glutathione S-transferase Mu 1	Genecard/Disgenet
79	IL18	Q14116	Interleukin-18	Genecard/Disgenet
80	TLR4	O00206	Toll-like receptor 4	Genecard/Disgenet
81	HMOX1	P09601	Heme oxygenase 1	Genecard/Disgenet
82	ICAM1	P05362	Intercellular adhesion molecule 1	Genecard/Disgenet
83	LEP	P41159	Leptin	Genecard/Disgenet
84	TGFB1	P01137	Transforming growth factor beta-1 proprotein	Genecard/Disgenet
85	IL1B	P01584	Interleukin-1 beta	Genecard/Disgenet
86	MEF2A	Q02078	Myocyte-specific enhancer factor 2A	Genecard/Disgenet
87	OLR1	P78380	Oxidized low-density lipoprotein receptor 1	Genecard/Disgenet
88	F2	P00734	coagulation factor II, thrombin	Genecard/Disgenet
89	GSTT1	P30711	Glutathione S-transferase theta-1	Genecard/Disgenet
90	PTGS2	P35354	Prostaglandin G/H synthase 2	Genecard/Disgenet
91	CXCL12	P48061	Stromal cell-derived factor 1	Genecard/Disgenet
92	SERPINA5	P05154	Plasma serine protease inhibitor	Genecard/Disgenet
93	PLA2G2A	P14555	Phospholipase A2	Genecard/Disgenet
94	SELP	P16109	P-selectin	Genecard/Disgenet
95	VDR	P11473	Vitamin D3 receptor	Genecard/Disgenet
96	SIRT1	Q96EB6	NAD-dependent protein deacetylase sirtuin-1	Genecard/Disgenet
97	ANGPTL3	Q9Y5C1	Angiopoietin-related protein 3	Genecard/Disgenet
98	LTA	P01374	Lymphotoxin-alpha	Genecard/Disgenet
99	SELE	P16581	E-selectin	Genecard/Disgenet
100	VWF	P04275	von Willebrand factor	Genecard/Disgenet
101	RETN	Q9HD89	Resistin	Genecard/Disgenet
102	THBD	P07204	Thrombomodulin	Genecard/Disgenet
103	LIPG	Q9Y5X9	Endothelial lipase	Genecard/Disgenet
104	CST3	P01034	Cystatin-C	Genecard/Disgenet
105	IL1RN	P18510	Interleukin-1 receptor antagonist protein	Genecard/Disgenet
106	CXCL8	P10145	Interleukin-8	Genecard/Disgenet
107	ITGB3	P05106	Integrin beta-3	Genecard/Disgenet
108	MTR	Q99707	Methionine synthase	Genecard/Disgenet
109	PLA2G6	O60733	85/88 kDa calcium-independent phospholipase A2	Genecard/Disgenet
110	KL	Q9UEF7	Klotho	Genecard/Disgenet
111	CDKN2A	P42771	Cyclin-dependent kinase inhibitor 2A	Genecard/Disgenet
112	CDKN2B	P42772	Cyclin-dependent kinase 4 inhibitor B	Genecard/Disgenet
113	APOA4	P06727	Apolipoprotein A-IV	Genecard/Disgenet
114	IL17A	Q16552	Interleukin-17A	Genecard/Disgenet
115	MMP1	P03956	Interstitial collagenase	Genecard/Disgenet
116	MMP2	P08253	matrix metallopeptidase 2	Genecard/Disgenet
117	NFKB1	P19838	nuclear factor kappa B subunit 1	Genecard/Disgenet
118	ANGPTL4	Q9BY76	Angiopoietin-related protein 4	Genecard/Disgenet
119	BDNF	P23560	Brain-derived neurotrophic factor	Genecard/Disgenet
120	SORT1	Q99523	Sortilin	Genecard/Disgenet
121	SHBG	P04278	Sex hormone-binding globulin	Genecard/Disgenet
122	SLC17A4	Q9Y2C5	Probable small intestine urate exporter	Genecard/Disgenet
123	CSK	P41240	Tyrosine-protein kinase CSK	Genecard/Disgenet
124	DNM2	P50570	Dynamin-2	Genecard/Disgenet
125	HLA-A	P04439	HLA class I histocompatibility antigen	Genecard/Disgenet
126	HNF4A	P41235	Hepatocyte nuclear factor 4-alpha	Genecard/Disgenet
127	SKIV2L	Q15477	Helicase SKI2W	Genecard/Disgenet
128	TSPAN8	P19075	Tetraspanin-8	Genecard/Disgenet
129	F7	P08709	Coagulation factor VII	Genecard/Disgenet
130	MFN2	O95140	Mitofusin-2	Genecard/OMIM
131	PINK1	Q9BXM7	Serine/threonine-protein kinase PINK1	Genecard/OMIM
132	ECE1	P42892	Endothelin-converting enzyme 1	Genecard/OMIM
133	LMNA	P02545	Prelamin-A/C	Genecard/OMIM
134	NCF2	P19878	Neutrophil cytosol factor 2	Genecard/OMIM
135	ADAM17	P78536	ADAM metallopeptidase domain 17	Genecard/OMIM
136	HTRA2	O43464	Serine protease HTRA2	Genecard/OMIM
137	BMPR2	Q13873	Bone morphogenetic protein receptor type-2	Genecard/OMIM
138	ATG16L1	Q676U5	Autophagy-related protein 16-1	Genecard/OMIM
139	PDCD1	Q9NZQ7	Programmed cell death 1 ligand 1	Genecard/OMIM
140	TKT	Q16832	Discoidin domain-containing receptor 2	Genecard/OMIM
141	MME	P08473	Neprilysin	Genecard/OMIM
142	PROM1	O43490	Prominin-1	Genecard/OMIM
143	PKD2	Q13563	Polycystin-2, PC2	Genecard/OMIM
144	ADH1C	P00326	Alcohol dehydrogenase 1C	Genecard/OMIM
145	GDNF	O00451	GDNF family receptor alpha-2	Genecard/OMIM
146	SQSTM1	Q13501	Sequestosome-1	Genecard/OMIM
147	FLT4	P35916	Vascular endothelial growth factor receptor 3	Genecard/OMIM
148	HLA-DQA1	P01909	HLA class II histocompatibility antigen	Genecard/OMIM
149	HLA-DQB1	P01920	HLA class II histocompatibility antigen	Genecard/OMIM
150	SLC17A5	Q9NRA2	Sialin	Genecard/OMIM
151	GJA1	P17302	Gap junction alpha-1 protein	Genecard/OMIM
152	ENPP1	P22413	Ectonucleotide pyrophosphatase/phosphodiesterase family member 1	Genecard/OMIM
153	EGFR	P35968	epidermal growth factor receptor	Genecard/OMIM
154	NCF1	P14598	Neutrophil cytosol factor 1	Genecard/OMIM
155	HSPB1	P04792	heat shock protein family B (small) member 1	Genecard/OMIM
156	IRF5	Q13568	Interferon regulatory factor 5	Genecard/OMIM
157	NOTCH1	P46531	Neurogenic locus notch homolog protein 1	Genecard/OMIM
158	PARK7	Q99497	Parkinson disease protein 7	Genecard/OMIM
159	SMAD1	Q15797	Mothers against decapentaplegic homolog 1	Genecard/OMIM
160	HGF	P08581	Hepatocyte growth factor receptor	Genecard/OMIM
161	LPA	Q9HBW0	Lysophosphatidic acid receptor 2	Genecard/OMIM/Disgenet
162	MTHFR	P42898	Methylenetetrahydrofolate reductase	Genecard/OMIM/Disgenet
163	PON1	P27169	paraoxonase 1	Genecard/OMIM/Disgenet
164	CD36	P16671	Platelet glycoprotein 4	Genecard/OMIM/Disgenet
165	CX3CR1	P49238	CX3C chemokine receptor 1	Genecard/OMIM/Disgenet
166	IRS1	P35568	Insulin receptor substrate 1	Genecard/OMIM/Disgenet
167	ABCA1	O95477	Phospholipid-transporting ATPase ABCA1	Genecard/OMIM/Disgenet
168	NOS3	P29474	Nitric oxide synthase, endothelial	Genecard/OMIM/Disgenet
169	IL6	P08887	Interleukin-6	Genecard/OMIM/Disgenet
170	NKX2-5	P52952	Homeobox protein Nkx-2.5	Genecard/OMIM/Disgenet
171	IL10	P22301	Interleukin-10	Genecard/OMIM/Disgenet
172	TNFRSF11B	O00300	Tumor necrosis factor receptor superfamily member 11B	Genecard/OMIM/Disgenet
173	PON2	Q15165	Serum paraoxonase/arylesterase 2	Genecard/OMIM/Disgenet
174	HFE	Q30201	Hereditary hemochromatosis protein	Genecard/OMIM/Disgenet
175	ABL1	P00519	Tyrosine-protein kinase ABL1	Genecard/OMIM/Disgenet
176	ABCB1	P08183	ATP binding cassette subfamily B member 1	Genecard/OMIM/Disgenet
177	GATA4	P43694	Transcription factor GATA-4	OMIM/Disgenet

## Sheet: Table S5
Table S5 Information for overlapped targets after PPI analysis.
Number	Name	Protein name	Degree	BetweennessCentrality	ClosenessCentrality
1	IL6	Interleukin-6	39	0.0690151	0.914894
2	VEGFA	Vascular endothelial growth factor A	35	0.0464089	0.843137
3	IL1B	Interleukin-1 beta	34	0.028356	0.826923
4	MMP9	matrix metallopeptidase 9	33	0.0237333	0.811321
5	CXCL8	Interleukin-8	33	0.0248764	0.811321
6	CCL2	C-C motif chemokine 2	32	0.0211279	0.796296
7	PTGS2	Prostaglandin G/H synthase 2	32	0.0313182	0.796296
8	IL10	Interleukin-10	29	0.0115727	0.754386
9	ESR1	Estrogen receptor	29	0.0572737	0.754386
10	EGFR	epidermal growth factor receptor	29	0.0279481	0.754386
11	MMP2	matrix metallopeptidase 2	28	0.012442	0.741379
12	CRP	C-reactive protein	27	0.0165823	0.728814
13	SERPINE1	Plasminogen activator inhibitor 1	27	0.0141932	0.728814
14	ICAM1	Intercellular adhesion molecule 1	27	0.00871772	0.716667
15	NOS3	Nitric oxide synthase, endothelial	26	0.0133847	0.716667
16	MPO	myeloperoxidase	26	0.0209275	0.716667
17	PPARG	Peroxisome proliferator activated receptor gamma	25	0.012298	0.704918
18	HMOX1	Heme oxygenase 1	24	0.0151835	0.693548
19	SELE	SELE	23	0.00332181	0.671875
20	MMP1	Interstitial collagenase	21	0.00236392	0.661538
21	MMP3	matrix metallopeptidase 3	21	0.00236392	0.661538
22	F2	coagulation factor II, thrombin	18	0.00924855	0.632353
23	THBD	Thrombomodulin	17	0.00361308	0.614286
24	SMAD3	SMAD family member 3	17	0.00212558	0.623188
25	CD40LG	CD40 ligand	16	0.00106305	0.605634
26	PLAU	plasminogen activator, urokinase	16	0.00122256	0.614286
27	NCF1	Neutrophil cytosol factor 1	16	0.000965	0.605634
28	CYP1A1	cytochrome P450 family 1 subfamily A member 1	16	0.0143798	0.614286
29	CYP3A4	cytochrome P450 family 3 subfamily A member 4	15	0.0106851	0.605634
30	OLR1	Oxidized low-density lipoprotein receptor 1	14	0.00121224	0.589041
31	ALOX5	arachidonate 5-lipoxygenase	14	0.00247719	0.597222
32	PON1	paraoxonase 1	14	0.0122863	0.597222
33	NFKB1	nuclear factor kappa B subunit 1	13	0.000773	0.589041
34	AR	androgen receptor	13	0.00356847	0.589041
35	CYP2C9	cytochrome P450 family 2 subfamily C member 9	13	0.0147904	0.581081
36	ADAM17	ADAM metallopeptidase domain 17	12	0	0.558442
37	ABCB1	ATP binding cassette subfamily B member 1	12	0.00468837	0.581081
38	ESR2	Estrogen receptor beta	11	0.00113918	0.573333
39	HSPB1	heat shock protein family B (small) member 1	11	0.000962	0.573333
40	GJA1	Gap junction alpha-1 protein	11	0.00159756	0.573333
41	ABCG2	ATP binding cassette subfamily G member 2	10	0.00375842	0.558442
42	GSTM1	Glutathione S-transferase Mu 1	9	0.00258645	0.551282
43	CYP1A2	cytochrome P450 family 1 subfamily A member 2	8	0.000527	0.511905
44	F7	Coagulation factor VII	6	0.00106144	0.5375

## Sheet: Table S6
Table S6 The details of the enrichment results of target genes
Category	Term	Count	Ratio	PValue	Genes
KEGG_PATHWAY	hsa05200:Pathways in cancer	12	27.2727	1.22527e-05	AR, IL6, CXCL8, SMAD3, MMP1, MMP2, PPARG, PTGS2, MMP9, EGFR, NFKB1, VEGFA
KEGG_PATHWAY	hsa04668:TNF signaling pathway	9	20.4545	1.64372e-07	IL6, IL1B, MMP3, CCL2, PTGS2, SELE, MMP9, NFKB1, ICAM1
KEGG_PATHWAY	hsa05144:Malaria	8	18.1818	1.11603e-08	IL10, IL6, CXCL8, CD40LG, IL1B, CCL2, SELE, ICAM1
KEGG_PATHWAY	hsa05323:Rheumatoid arthritis	8	18.1818	6.95976e-07	IL6, CXCL8, MMP1, IL1B, MMP3, CCL2, ICAM1, VEGFA
KEGG_PATHWAY	hsa05142:Chagas disease (American trypanosomiasis)	8	18.1818	2.17199e-06	IL10, IL6, CXCL8, SMAD3, IL1B, SERPINE1, CCL2, NFKB1
KEGG_PATHWAY	hsa05202:Transcriptional misregulation in cancer	8	18.1818	4.91283e-05	IL6, CXCL8, PLAU, MMP3, PPARG, MPO, MMP9, NFKB1
KEGG_PATHWAY	hsa05206:MicroRNAs in cancer	8	18.1818	0.00132835	ABCB1, PLAU, HMOX1, PTGS2, MMP9, EGFR, NFKB1, VEGFA
KEGG_PATHWAY	hsa04064:NF-kappa B signaling pathway	7	15.9091	1.08437e-05	CXCL8, CD40LG, PLAU, IL1B, PTGS2, NFKB1, ICAM1
KEGG_PATHWAY	hsa04066:HIF-1 signaling pathway	7	15.9091	1.91365e-05	IL6, NOS3, SERPINE1, HMOX1, EGFR, NFKB1, VEGFA
KEGG_PATHWAY	hsa05219:Bladder cancer	6	13.6364	3.7431e-06	CXCL8, MMP1, MMP2, MMP9, EGFR, VEGFA
KEGG_PATHWAY	hsa05204:Chemical carcinogenesis	6	13.6364	0.00010125	CYP2C9, GSTM1, CYP1A2, CYP1A1, CYP3A4, PTGS2
KEGG_PATHWAY	hsa04915:Estrogen signaling pathway	6	13.6364	0.000277228	NOS3, MMP2, ESR1, MMP9, EGFR, ESR2
KEGG_PATHWAY	hsa05146:Amoebiasis	6	13.6364	0.000380969	IL10, IL6, CXCL8, IL1B, HSPB1, NFKB1
KEGG_PATHWAY	hsa05164:Influenza A	6	13.6364	0.00350381	IL6, CXCL8, IL1B, CCL2, NFKB1, ICAM1
KEGG_PATHWAY	hsa05205:Proteoglycans in cancer	6	13.6364	0.00632416	PLAU, MMP2, ESR1, MMP9, EGFR, VEGFA
KEGG_PATHWAY	hsa04060:Cytokine-cytokine receptor interaction	6	13.6364	0.0140105	IL10, IL6, CXCL8, CD40LG, IL1B, CCL2
KEGG_PATHWAY	hsa05143:African trypanosomiasis	5	11.3636	3.92292e-05	IL10, IL6, IL1B, SELE, ICAM1
KEGG_PATHWAY	hsa04621:NOD-like receptor signaling pathway	5	11.3636	0.00031893	IL6, CXCL8, IL1B, CCL2, NFKB1
KEGG_PATHWAY	hsa05321:Inflammatory bowel disease (IBD)	5	11.3636	0.000533066	IL10, IL6, SMAD3, IL1B, NFKB1
KEGG_PATHWAY	hsa04610:Complement and coagulation cascades	5	11.3636	0.00070988	THBD, F7, PLAU, SERPINE1, F2
KEGG_PATHWAY	hsa05140:Leishmaniasis	5	11.3636	0.000791027	IL10, NCF1, IL1B, PTGS2, NFKB1
KEGG_PATHWAY	hsa00980:Metabolism of xenobiotics by cytochrome P450	5	11.3636	0.000924755	CYP2C9, GSTM1, CYP1A2, CYP1A1, CYP3A4
KEGG_PATHWAY	hsa05133:Pertussis	5	11.3636	0.000972669	IL10, IL6, CXCL8, IL1B, NFKB1
KEGG_PATHWAY	hsa05134:Legionellosis	4	9.09091	0.00394853	IL6, CXCL8, IL1B, NFKB1
KEGG_PATHWAY	hsa04370:VEGF signaling pathway	4	9.09091	0.00556654	NOS3, HSPB1, PTGS2, VEGFA
KEGG_PATHWAY	hsa00830:Retinol metabolism	4	9.09091	0.00636515	CYP2C9, CYP1A2, CYP1A1, CYP3A4
KEGG_PATHWAY	hsa05212:Pancreatic cancer	4	9.09091	0.00664577	SMAD3, EGFR, NFKB1, VEGFA
KEGG_PATHWAY	hsa05120:Epithelial cell signaling in Helicobacter pylori infection	4	9.09091	0.00722895	ADAM17, CXCL8, EGFR, NFKB1
KEGG_PATHWAY	hsa00982:Drug metabolism - cytochrome P450	4	9.09091	0.0075316	CYP2C9, GSTM1, CYP1A2, CYP3A4
KEGG_PATHWAY	hsa05132:Salmonella infection	4	9.09091	0.0129844	IL6, CXCL8, IL1B, NFKB1
KEGG_PATHWAY	hsa00591:Linoleic acid metabolism	3	6.81818	0.012711	CYP2C9, CYP1A2, CYP3A4
GO_BP	GO:0007165~signal transduction	12	27.2727	0.000120953	THBD, AR, GJA1, CXCL8, PLAU, IL1B, CCL2, PPARG, ESR1, EGFR, ESR2, NFKB1
GO_BP	GO:0006954~inflammatory response	11	25	3.00896e-08	IL10, CRP, IL6, CXCL8, CD40LG, IL1B, CCL2, OLR1, PTGS2, SELE, NFKB1
GO_BP	GO:0045944~positive regulation of transcription from RNA polymerase II promoter	11	25	0.000144832	IL10, AR, IL6, SMAD3, IL1B, SERPINE1, PPARG, ESR1, EGFR, NFKB1, VEGFA
GO_BP	GO:0043066~negative regulation of apoptotic process	10	22.7273	1.80934e-06	IL10, IL6, SMAD3, CD40LG, HSPB1, MPO, MMP9, EGFR, NFKB1, VEGFA
GO_BP	GO:0001666~response to hypoxia	9	20.4545	1.09979e-08	F7, ADAM17, SMAD3, PLAU, MMP2, CYP1A1, HMOX1, CCL2, VEGFA
GO_BP	GO:0042493~response to drug	9	20.4545	8.79844e-07	IL10, IL6, ADAM17, ABCB1, CYP1A1, PPARG, PTGS2, ABCG2, ICAM1
GO_BP	GO:0045893~positive regulation of transcription, DNA-templated	9	20.4545	4.17364e-05	IL10, AR, IL6, SMAD3, IL1B, PPARG, ESR1, ESR2, NFKB1
GO_BP	GO:0055114~oxidation-reduction process	9	20.4545	0.000110852	CYP2C9, NCF1, NOS3, ALOX5, CYP1A2, CYP1A1, CYP3A4, PTGS2, MPO
GO_BP	GO:0001525~angiogenesis	8	18.1818	1.42301e-06	CXCL8, NOS3, MMP2, SERPINE1, HMOX1, CCL2, PTGS2, VEGFA
GO_BP	GO:0006508~proteolysis	8	18.1818	0.000253061	ADAM17, PLAU, MMP1, MMP2, MMP3, OLR1, F2, MMP9
GO_BP	GO:0045429~positive regulation of nitric oxide biosynthetic process	7	15.9091	1.11395e-09	IL6, SMAD3, IL1B, PTGS2, ESR1, EGFR, ICAM1
GO_BP	GO:0071222~cellular response to lipopolysaccharide	7	15.9091	4.04369e-07	IL10, IL6, CXCL8, SERPINE1, CCL2, NFKB1, ICAM1
GO_BP	GO:0045766~positive regulation of angiogenesis	7	15.9091	4.48627e-07	CXCL8, NOS3, IL1B, SERPINE1, HSPB1, HMOX1, VEGFA
GO_BP	GO:0050900~leukocyte migration	7	15.9091	6.35998e-07	THBD, MMP1, OLR1, F2, SELE, MMP9, ICAM1
GO_BP	GO:0032496~response to lipopolysaccharide	7	15.9091	3.57978e-06	THBD, ADAM17, CYP1A2, CYP1A1, PTGS2, MPO, SELE
GO_BP	GO:0010628~positive regulation of gene expression	7	15.9091	5.11765e-05	CRP, AR, IL6, GJA1, SMAD3, IL1B, VEGFA
GO_BP	GO:0008285~negative regulation of cell proliferation	7	15.9091	0.000482573	IL10, AR, IL6, CXCL8, NOS3, IL1B, PTGS2
GO_BP	GO:0006955~immune response	7	15.9091	0.000665991	IL10, IL6, CXCL8, SMAD3, CD40LG, IL1B, CCL2
GO_BP	GO:0051091~positive regulation of sequence-specific DNA binding transcription factor activity	6	13.6364	6.92129e-06	IL10, IL6, IL1B, PPARG, ESR1, ESR2
GO_BP	GO:0001934~positive regulation of protein phosphorylation	6	13.6364	1.74818e-05	ADAM17, IL1B, F2, MMP9, EGFR, VEGFA
GO_BP	GO:0051092~positive regulation of NF-kappaB transcription factor activity	6	13.6364	2.18518e-05	AR, IL6, CD40LG, IL1B, NFKB1, ICAM1
GO_BP	GO:0030335~positive regulation of cell migration	6	13.6364	0.000102745	F7, ADAM17, SMAD3, PLAU, EGFR, VEGFA
GO_BP	GO:0008284~positive regulation of cell proliferation	6	13.6364	0.00650765	AR, IL6, ADAM17, F2, EGFR, VEGFA
GO_BP	GO:0071260~cellular response to mechanical stimulus	5	11.3636	3.19694e-05	GJA1, IL1B, PTGS2, EGFR, NFKB1
GO_BP	GO:0071347~cellular response to interleukin-1	5	11.3636	3.19694e-05	IL6, CXCL8, CCL2, NFKB1, ICAM1
GO_BP	GO:0008360~regulation of cell shape	5	11.3636	0.000443803	IL6, CCL2, F2, ICAM1, VEGFA
GO_BP	GO:0007568~aging	5	11.3636	0.000822954	IL10, IL6, CYP1A1, CCL2, MPO
GO_BP	GO:0070374~positive regulation of ERK1 and ERK2 cascade	5	11.3636	0.0010244	IL6, CCL2, EGFR, ICAM1, VEGFA
GO_BP	GO:0001701~in utero embryonic development	5	11.3636	0.00130922	AR, GJA1, SMAD3, NOS3, VEGFA
GO_BP	GO:0007267~cell-cell signaling	5	11.3636	0.00397153	IL10, AR, GJA1, IL1B, ESR2
GO_BP	GO:0006810~transport	5	11.3636	0.0118464	AR, GJA1, SMAD3, ABCB1, ABCG2
GO_BP	GO:0017144~drug metabolic process	4	9.09091	4.383e-05	CYP2C9, CYP1A2, CYP1A1, CYP3A4
GO_BP	GO:0045909~positive regulation of vasodilation	4	9.09091	5.45587e-05	GJA1, NOS3, HMOX1, EGFR
GO_BP	GO:0071392~cellular response to estradiol stimulus	4	9.09091	6.68766e-05	IL10, IL6, ESR1, EGFR
GO_BP	GO:0045907~positive regulation of vasoconstriction	4	9.09091	7.36633e-05	GJA1, PTGS2, EGFR, ICAM1
GO_BP	GO:1902042~negative regulation of extrinsic apoptotic signaling pathway via death domain receptors	4	9.09091	8.08852e-05	NOS3, SERPINE1, HMOX1, ICAM1
GO_BP	GO:0007566~embryo implantation	4	9.09091	0.00016748	IL1B, MMP2, PTGS2, MMP9
GO_BP	GO:0048661~positive regulation of smooth muscle cell proliferation	4	9.09091	0.000483469	IL6, HMOX1, PTGS2, EGFR
GO_BP	GO:0030574~collagen catabolic process	4	9.09091	0.000584462	MMP1, MMP2, MMP3, MMP9
GO_BP	GO:0043627~response to estrogen	4	9.09091	0.000611653	F7, HMOX1, PPARG, ESR1
GO_BP	GO:0008217~regulation of blood pressure	4	9.09091	0.000611653	NOS3, HMOX1, PPARG, PTGS2
GO_BP	GO:0048010~vascular endothelial growth factor receptor signaling pathway	4	9.09091	0.000824801	NCF1, HSPB1, CCL2, VEGFA
GO_BP	GO:0030324~lung development	4	9.09091	0.000965331	NOS3, CYP1A2, EGFR, VEGFA
GO_BP	GO:0022617~extracellular matrix disassembly	4	9.09091	0.000965331	MMP1, MMP2, MMP3, MMP9
GO_BP	GO:0032355~response to estradiol	4	9.09091	0.00162428	F7, CYP1A2, PTGS2, ESR1
GO_BP	GO:0071456~cellular response to hypoxia	4	9.09091	0.00189345	HMOX1, PTGS2, ICAM1, VEGFA
GO_BP	GO:0006979~response to oxidative stress	4	9.09091	0.00278985	HMOX1, PTGS2, MPO, EGFR
GO_BP	GO:0071356~cellular response to tumor necrosis factor	4	9.09091	0.00278985	IL6, CXCL8, CCL2, ICAM1
GO_BP	GO:0030308~negative regulation of cell growth	4	9.09091	0.00365073	GJA1, SMAD3, PPARG, ESR2
GO_BP	GO:0006367~transcription initiation from RNA polymerase II promoter	4	9.09091	0.00688565	AR, PPARG, ESR1, ESR2
GO_BP	GO:0007596~blood coagulation	4	9.09091	0.0115834	THBD, F7, PLAU, F2
GO_BP	GO:0016098~monoterpenoid metabolic process	3	6.81818	9.54554e-05	CYP2C9, CYP1A2, CYP3A4
GO_BP	GO:0042737~drug catabolic process	3	6.81818	9.54554e-05	CYP2C9, CYP1A2, CYP3A4
GO_BP	GO:0010544~negative regulation of platelet activation	3	6.81818	0.000177604	THBD, NOS3, F2
GO_BP	GO:0097267~omega-hydroxylase P450 pathway	3	6.81818	0.000227977	CYP2C9, CYP1A2, CYP1A1
GO_BP	GO:0051918~negative regulation of fibrinolysis	3	6.81818	0.000284508	THBD, SERPINE1, F2
GO_BP	GO:0061045~negative regulation of wound healing	3	6.81818	0.000347166	GJA1, SMAD3, SERPINE1
GO_BP	GO:0050927~positive regulation of positive chemotaxis	3	6.81818	0.000347166	F7, SMAD3, VEGFA
GO_BP	GO:0070989~oxidative demethylation	3	6.81818	0.000415922	CYP2C9, CYP1A2, CYP3A4
GO_BP	GO:0042738~exogenous drug catabolic process	3	6.81818	0.000415922	CYP2C9, CYP1A2, CYP3A4
GO_BP	GO:0051926~negative regulation of calcium ion transport	3	6.81818	0.000490745	NOS3, PTGS2, ICAM1
GO_BP	GO:0030194~positive regulation of blood coagulation	3	6.81818	0.000571606	F7, SERPINE1, F2
GO_BP	GO:1904707~positive regulation of vascular smooth muscle cell proliferation	3	6.81818	0.000658473	IL10, MMP2, MMP9
GO_BP	GO:0060749~mammary gland alveolus development	3	6.81818	0.000850111	AR, ESR1, VEGFA
GO_BP	GO:0019373~epoxygenase P450 pathway	3	6.81818	0.000954822	CYP2C9, CYP1A2, CYP1A1
GO_BP	GO:0002690~positive regulation of leukocyte chemotaxis	3	6.81818	0.000954822	F7, IL6, ADAM17
GO_BP	GO:0042730~fibrinolysis	3	6.81818	0.00130417	PLAU, SERPINE1, F2
GO_BP	GO:0035902~response to immobilization stress	3	6.81818	0.00130417	CYP1A2, CYP1A1, PPARG
GO_BP	GO:0007159~leukocyte cell-cell adhesion	3	6.81818	0.00185103	CD40LG, SELE, ICAM1
GO_BP	GO:0050999~regulation of nitric-oxide synthase activity	3	6.81818	0.00200203	NOS3, IL1B, EGFR
GO_BP	GO:0045930~negative regulation of mitotic cell cycle	3	6.81818	0.00200203	IL10, SMAD3, EGFR
GO_BP	GO:2000352~negative regulation of endothelial cell apoptotic process	3	6.81818	0.00232097	IL10, SERPINE1, ICAM1
GO_BP	GO:0097421~liver regeneration	3	6.81818	0.00248886	IL10, HMOX1, EGFR
GO_BP	GO:0071549~cellular response to dexamethasone stimulus	3	6.81818	0.00248886	IL6, CCL2, EGFR
GO_BP	GO:0043200~response to amino acid	3	6.81818	0.0028413	IL6, CCL2, ICAM1
GO_BP	GO:0031663~lipopolysaccharide-mediated signaling pathway	3	6.81818	0.00302581	NOS3, IL1B, CCL2
GO_BP	GO:0046677~response to antibiotic	3	6.81818	0.00302581	IL6, CYP1A1, CCL2
GO_BP	GO:0006953~acute-phase response	3	6.81818	0.00446943	CRP, IL6, F2
GO_BP	GO:0008202~steroid metabolic process	3	6.81818	0.00541139	CYP2C9, CYP1A1, CYP3A4
GO_BP	GO:0031100~organ regeneration	3	6.81818	0.00643629	F7, CCL2, PPARG
GO_BP	GO:0009408~response to heat	3	6.81818	0.00670528	IL6, NOS3, CCL2
GO_BP	GO:0071407~cellular response to organic cyclic compound	3	6.81818	0.00999168	IL1B, CYP1A1, CCL2
GO_BP	GO:0009612~response to mechanical stimulus	3	6.81818	0.00999168	CCL2, PPARG, MPO
GO_BP	GO:0042102~positive regulation of T cell proliferation	3	6.81818	0.0103195	IL6, CD40LG, IL1B
GO_BP	GO:0050679~positive regulation of epithelial cell proliferation	3	6.81818	0.0103195	IL6, EGFR, VEGFA
GO_BP	GO:0009611~response to wounding	3	6.81818	0.0113315	CYP1A1, CCL2, F2
GO_BP	GO:0050727~regulation of inflammatory response	3	6.81818	0.0113315	PTGS2, SELE, ESR1
GO_BP	GO:0051384~response to glucocorticoid	3	6.81818	0.0120295	IL10, IL6, PTGS2
GO_BP	GO:0030183~B cell differentiation	3	6.81818	0.0123854	IL10, ADAM17, CD40LG
GO_BP	GO:0030593~neutrophil chemotaxis	3	6.81818	0.0123854	CXCL8, IL1B, CCL2
GO_BP	GO:0035690~cellular response to drug	3	6.81818	0.0134807	IL1B, CCL2, EGFR
GO_BP	GO:0050729~positive regulation of inflammatory response	3	6.81818	0.0150041	SERPINE1, CCL2, EGFR
GO_BP	GO:0007623~circadian rhythm	3	6.81818	0.0157924	F7, SERPINE1, EGFR
GO_BP	GO:0045454~cell redox homeostasis	3	6.81818	0.0165982	IL6, NCF1, NOS3
GO_BP	GO:0006805~xenobiotic metabolic process	3	6.81818	0.0170076	CYP2C9, CYP1A2, CYP3A4
GO_BP	GO:0042060~wound healing	3	6.81818	0.0178393	IL6, SMAD3, EGFR
GO_BP	GO:0050731~positive regulation of peptidyl-tyrosine phosphorylation	3	6.81818	0.018688	IL6, ICAM1, VEGFA
GO_BP	GO:0030307~positive regulation of cell growth	3	6.81818	0.0195535	ADAM17, F2, EGFR
GO_BP	GO:0051897~positive regulation of protein kinase B signaling	3	6.81818	0.0195535	F7, IL6, EGFR
GO_BP	GO:0050830~defense response to Gram-positive bacterium	3	6.81818	0.0199925	CRP, IL6, ADAM17
GO_BP	GO:0014806~smooth muscle hyperplasia	2	4.54545	0.00511508	NOS3, HMOX1
GO_BP	GO:0032787~monocarboxylic acid metabolic process	2	4.54545	0.00766303	CYP2C9, CYP1A2
GO_BP	GO:0002693~positive regulation of cellular extravasation	2	4.54545	0.00766303	CCL2, ICAM1
GO_BP	GO:0006778~porphyrin-containing compound metabolic process	2	4.54545	0.0102046	CYP1A2, CYP1A1
GO_BP	GO:0010574~regulation of vascular endothelial growth factor production	2	4.54545	0.0102046	IL6, CCL2
GO_BP	GO:0060571~morphogenesis of an epithelial fold	2	4.54545	0.0102046	AR, EGFR
GO_BP	GO:0038033~positive regulation of endothelial cell chemotaxis by VEGF-activated vascular endothelial growth factor receptor signaling pathway	2	4.54545	0.0127398	HSPB1, VEGFA
GO_BP	GO:0006706~steroid catabolic process	2	4.54545	0.0127398	CYP1A2, CYP3A4
GO_BP	GO:0031622~positive regulation of fever generation	2	4.54545	0.0127398	IL1B, PTGS2
GO_BP	GO:0060137~maternal process involved in parturition	2	4.54545	0.0152687	CYP1A1, CCL2
GO_BP	GO:0046483~heterocycle metabolic process	2	4.54545	0.0152687	CYP1A2, CYP3A4
GO_BP	GO:0002933~lipid hydroxylation	2	4.54545	0.0152687	CYP1A1, CYP3A4
GO_BP	GO:0042908~xenobiotic transport	2	4.54545	0.0177912	ABCB1, ABCG2
GO_BP	GO:0090050~positive regulation of cell migration involved in sprouting angiogenesis	2	4.54545	0.0177912	PTGS2, VEGFA
GO_BP	GO:0032731~positive regulation of interleukin-1 beta production	2	4.54545	0.0203075	SMAD3, HSPB1
GO_CC	GO:0005615~extracellular space	24	54.5455	1.81249e-15	IL10, CRP, CXCL8, MMP2, PON1, MMP3, SERPINE1, HSPB1, F2, MPO, SELE, MMP9, EGFR, ICAM1, VEGFA, F7, THBD, IL6, CD40LG, PLAU, IL1B, ALOX5, CCL2, HMOX1
GO_CC	GO:0005886~plasma membrane	21	47.7273	0.000459587	SMAD3, ABCB1, NOS3, MMP2, SERPINE1, HSPB1, F2, SELE, ESR1, EGFR, ICAM1, F7, AR, THBD, GJA1, ADAM17, CD40LG, PLAU, OLR1, HMOX1, ABCG2
GO_CC	GO:0005576~extracellular region	17	38.6364	3.37651e-07	IL10, CRP, CXCL8, MMP1, MMP2, PON1, MMP3, SERPINE1, F2, MMP9, ESR2, VEGFA, F7, IL6, PLAU, IL1B, CCL2
GO_CC	GO:0009986~cell surface	8	18.1818	0.000251825	THBD, ADAM17, ABCB1, CD40LG, PLAU, EGFR, ICAM1, VEGFA
GO_CC	GO:0005789~endoplasmic reticulum membrane	8	18.1818	0.00375501	CYP2C9, GJA1, CYP1A2, CYP1A1, HMOX1, CYP3A4, PTGS2, EGFR
GO_CC	GO:0043231~intracellular membrane-bounded organelle	7	15.9091	0.0018664	CYP2C9, PON1, CYP1A2, CYP1A1, OLR1, PPARG, CYP3A4
GO_CC	GO:0045121~membrane raft	6	13.6364	0.000119337	ADAM17, GJA1, OLR1, SELE, EGFR, ICAM1
GO_CC	GO:0005925~focal adhesion	6	13.6364	0.0021823	ADAM17, GJA1, PLAU, HSPB1, EGFR, ICAM1
GO_CC	GO:0031090~organelle membrane	5	11.3636	5.18709e-05	CYP2C9, CYP1A2, CYP1A1, CYP3A4, PTGS2
GO_CC	GO:0005578~proteinaceous extracellular matrix	5	11.3636	0.00359705	MMP1, MMP2, MMP3, MMP9, VEGFA
GO_CC	GO:0005901~caveola	4	9.09091	0.000482666	NOS3, HMOX1, PTGS2, SELE
GO_CC	GO:0030141~secretory granule	3	6.81818	0.0131913	IL1B, MPO, VEGFA
GO_MF	GO:0005515~protein binding	35	79.5455	0.000230311	CRP, CXCL8, ABCB1, NCF1, SERPINE1, HSPB1, PTGS2, EGFR, ICAM1, THBD, GJA1, PLAU, ALOX5, HMOX1, OLR1, IL10, SMAD3, NOS3, MMP2, MMP3, F2, SELE, MMP9, ESR1, ESR2, NFKB1, VEGFA, F7, AR, ADAM17, IL6, CD40LG, CYP1A1, PPARG, ABCG2
GO_MF	GO:0019899~enzyme binding	11	25	8.39115e-09	AR, GSTM1, CYP1A2, CYP1A1, HMOX1, PPARG, CYP3A4, PTGS2, ESR1, EGFR, ESR2
GO_MF	GO:0008270~zinc ion binding	9	20.4545	0.00851597	AR, SMAD3, MMP1, MMP2, MMP3, PPARG, ESR1, MMP9, ESR2
GO_MF	GO:0020037~heme binding	8	18.1818	5.01976e-08	CYP2C9, NOS3, CYP1A2, CYP1A1, HMOX1, CYP3A4, PTGS2, MPO
GO_MF	GO:0042803~protein homodimerization activity	8	18.1818	0.00227411	GSTM1, SMAD3, PON1, HMOX1, PTGS2, NFKB1, ABCG2, VEGFA
GO_MF	GO:0042802~identical protein binding	8	18.1818	0.00262801	SMAD3, HSPB1, PPARG, ESR1, MMP9, EGFR, NFKB1, VEGFA
GO_MF	GO:0004252~serine-type endopeptidase activity	7	15.9091	4.27446e-05	F7, PLAU, MMP1, MMP2, MMP3, F2, MMP9
GO_MF	GO:0005509~calcium ion binding	7	15.9091	0.00917636	CRP, THBD, F7, MMP1, PON1, MMP3, F2
GO_MF	GO:0005506~iron ion binding	6	13.6364	4.17655e-05	CYP2C9, NOS3, ALOX5, CYP1A2, CYP1A1, CYP3A4
GO_MF	GO:0005102~receptor binding	6	13.6364	0.00194845	F7, AR, GJA1, SERPINE1, CCL2, F2
GO_MF	GO:0003682~chromatin binding	6	13.6364	0.00303395	AR, PPARG, MPO, ESR1, EGFR, NFKB1
GO_MF	GO:0004222~metalloendopeptidase activity	5	11.3636	0.000192075	ADAM17, MMP1, MMP2, MMP3, MMP9
GO_MF	GO:0005125~cytokine activity	5	11.3636	0.00102612	IL10, IL6, CD40LG, IL1B, VEGFA
GO_MF	GO:0016491~oxidoreductase activity	5	11.3636	0.00164397	CYP2C9, NOS3, CYP1A2, CYP1A1, CYP3A4
GO_MF	GO:0008134~transcription factor binding	5	11.3636	0.00578059	AR, SMAD3, PPARG, ESR1, NFKB1
GO_MF	GO:0005496~steroid binding	4	9.09091	4.31502e-05	AR, CYP3A4, ESR1, ESR2
GO_MF	GO:0004879~RNA polymerase II transcription factor activity, ligand-activated sequence-specific DNA binding	4	9.09091	0.000103661	AR, PPARG, ESR1, ESR2
GO_MF	GO:0019825~oxygen binding	4	9.09091	0.000230865	CYP2C9, CYP1A2, CYP1A1, CYP3A4
GO_MF	GO:0003707~steroid hormone receptor activity	4	9.09091	0.000388423	AR, PPARG, ESR1, ESR2
GO_MF	GO:0004497~monooxygenase activity	4	9.09091	0.000430837	CYP2C9, CYP1A2, CYP1A1, CYP3A4
GO_MF	GO:0008237~metallopeptidase activity	4	9.09091	0.00114377	ADAM17, MMP2, MMP3, MMP9
GO_MF	GO:0008083~growth factor activity	4	9.09091	0.00808305	IL10, IL6, F2, VEGFA
GO_MF	GO:0044212~transcription regulatory region DNA binding	4	9.09091	0.0168762	AR, SMAD3, PPARG, NFKB1
GO_MF	GO:0004888~transmembrane signaling receptor activity	4	9.09091	0.0170862	THBD, SELE, EGFR, ICAM1
GO_MF	GO:0034875~caffeine oxidase activity	3	6.81818	3.79045e-05	CYP2C9, CYP1A2, CYP3A4
GO_MF	GO:0016712~oxidoreductase activity, acting on paired donors, with incorporation or reduction of molecular oxygen, reduced flavin or flavoprotein as one donor, and incorporation of one atom of oxygen	3	6.81818	0.000651621	CYP1A2, CYP1A1, CYP3A4
GO_MF	GO:0008395~steroid hydroxylase activity	3	6.81818	0.00198139	CYP2C9, CYP1A1, CYP3A4
GO_MF	GO:0070330~aromatase activity	3	6.81818	0.00213644	CYP1A2, CYP1A1, CYP3A4
GO_MF	GO:0001046~core promoter sequence-specific DNA binding	3	6.81818	0.00535635	PPARG, ESR1, ESR2
GO_MF	GO:0004175~endopeptidase activity	3	6.81818	0.00833942	MMP1, MMP3, MMP9
GO_MF	GO:0008013~beta-catenin binding	3	6.81818	0.018504	AR, SMAD3, ESR1
GO_MF	GO:0070576~vitamin D 24-hydroxylase activity	2	4.54545	0.00508815	CYP1A1, CYP3A4
GO_MF	GO:0038052~RNA polymerase II transcription factor activity, estrogen-activated sequence-specific DNA binding	2	4.54545	0.00508815	ESR1, ESR2
GO_MF	GO:0034056~estrogen response element binding	2	4.54545	0.010151	ESR1, ESR2
GO_MF	GO:0032451~demethylase activity	2	4.54545	0.012673	CYP1A2, CYP1A1
GO_MF	GO:0008559~xenobiotic-transporting ATPase activity	2	4.54545	0.012673	ABCB1, ABCG2
GO_MF	GO:0030284~estrogen receptor activity	2	4.54545	0.012673	ESR1, ESR2
GO_MF	GO:0005138~interleukin-6 receptor binding	2	4.54545	0.0176981	IL6, ADAM17
GO_MF	GO:0030235~nitric-oxide synthase regulator activity	2	4.54545	0.0202013	ESR1, EGFR

## Sheet: Table S7
Table S7 Docking scores of the active compounds of hawthorn leaves with their potential targets
Compounds	Pubchem ID	Targets	PDB Code	Docking Score (kcal/mol)
Quercetin	5280343	PTGS2	5ikq	-8.2
Isorhamnetin	5281654	PTGS2	5ikq	-8.5
Kaempferol	5280863	PTGS2	5ikq	-7.2
Quercetin	5280343	IL-10	2ilk	-6.5
Kaempferol	5280863	ICAM	5MZA	-7.3
Quercetin	5280343	ICAM	5MZA	-7.4
Kaempferol	5280863	EGFR	5CAP	-7.7
Isorhamnetin	5281654	EGFR	5CAP	-7.8
Quercetin	5280343	EGFR	5CAP	-8
Quercetin	5280343	MMP2	1eak	-8.3
Isorhamnetin	5281654	MMP2	1eak	-7.9
Kaempferol	5280863	MMP2	1eak	-7.9
Quercetin	5280343	IL-6	4cni	-5.5
Quercetin	5280343	MMP9	1L6J	-5.8
Kaempferol	5280863	MMP9	1L6J	-5.2
Isorhamnetin	5281654	MMP9	1L6J	-5.3
Kaempferol	5280863	ESR1	1hcq	-5.6
Isorhamnetin	5281654	ESR1	1hcq	-5.5
Quercetin	5280343	ESR1	1hcq	-5.5
Quercetin	5280343	CRP	3PVN	-5.2
Quercetin	5280343	CXCL8	6WZM	-5.4
Quercetin	5280343	IL-1B	4DEP	-5.7
Quercetin	5280343	CCL2	4zk9	-3.8
Quercetin	5280343	SERPINE1	4AQH	-5.3
Quercetin	5280343	VEGFA	3bdy	-4.8
